# Supplementary material for: Biofilm and Pathogenesis-Related Proteins in the Foodborne P. fluorescens ITEM 17298 With Distinctive Phenotypes During Cold Storage
Source: Front Microbiol. 2020 May 28;11:991. doi: 10.3389/fmicb.2020.00991 (PMC7326052; doi:10.3389/fmicb.2020.00991)
Supplement: TABLE S3 — Quantitative proteome data MM, based on NSAF. [file Data_Sheet_3.xlsx]

## Sheet: all
Supplementary Table S3. Quantitative proteome data MM, based on NSAF						NSAF
						T	T	T	UT	UT	UT	average	average	ratio	sign.	repcount	repcount	MeV
Accession Number	main role (TIRGRFAMS)	subrole (TIGRFAMS)	description (TIGRFAMS)	description (database header)	Molecular Weight	TA	TB	TC	UTA	UTB	UTC	T	UT	T/UT	t test p0.01	T	UT
PROKKA_03985	Amino acid biosynthesis	Aromatic amino acid family	3-phosphoshikimate 1-carboxyvinyltransferase	3-phosphoshikimate 1-carboxyvinyltransferase	44 kDa	0.00019434						0.00019434			0	1	off	false
PROKKA_04081	Amino acid biosynthesis	Glutamate family	-	Glutamate synthase [NADPH] large chain	59 kDa	0.00015071						0.00015071			0	1	off	false
PROKKA_01092	Amino acid biosynthesis	Serine family	phosphoglycerate dehydrogenase	Glycerate dehydrogenase	34 kDa		0.00033871					0.00033871			0	1	off	false
PROKKA_03906	Amino acid biosynthesis	Aromatic amino acid family	3-deoxy-7-phosphoheptulonate synthase	Phospho-2-dehydro-3-deoxyheptonate aldolase	50 kDa		0.00016129					0.00016129			0	1	off	false
PROKKA_04491	Amino acid biosynthesis	Aromatic amino acid family	chorismate mutase	Prephenate dehydratase	40 kDa		0.00019851					0.00019851			0	1	off	false
PROKKA_00203	Amino acid biosynthesis	Aspartate family	O-succinylhomoserine (thiol)-lyase	Cystathionine beta-lyase	42 kDa					0.00025578			0.00025578		0	off	1	false
PROKKA_03462	Amino acid biosynthesis	Glutamate family	glutamine synthetase, type I	Gamma-glutamylputrescine synthetase PuuA	51 kDa						0.00019726		0.00019726		0	off	1	false
PROKKA_04990	Amino acid biosynthesis	Serine family	phosphoglycerate dehydrogenase	Homoserine dehydrogenase	46 kDa						0.00013696		0.00013696		0	off	1	false
PROKKA_02987	Amino acid biosynthesis	Histidine family	imidazole glycerol phosphate synthase, glutamine amidotransferase subunit	Imidazole glycerol phosphate synthase subunit HisH 1	23 kDa						0.00028038		0.00028038		0	off	1	false
PROKKA_01487	Amino acid biosynthesis	Histidine family	histidinol-phosphatase	Inositol-1-monophosphatase	30 kDa						0.00021933		0.00021933		0	off	1	false
PROKKA_03045	Amino acid biosynthesis	Histidine family	phosphoribosyl-ATP diphosphatase	Phosphoribosyl-ATP pyrophosphatase	12 kDa					0.00067665			0.00067665		0	off	1	false
PROKKA_04991	Amino acid biosynthesis	Aspartate family	threonine synthase	Threonine synthase	52 kDa					0.0002116			0.0002116		0	off	1	false
PROKKA_00904	Amino acid biosynthesis	Aromatic amino acid family	tryptophan synthase, beta subunit	Tryptophan synthase beta chain	67 kDa						9.4649e-05		9.4649e-05		0	off	1	false
PROKKA_03726	Amino acid biosynthesis	Aspartate family	4-hydroxy-tetrahydrodipicolinate reductase	4-hydroxy-tetrahydrodipicolinate reductase	28 kDa		0.00026962		0.00032221			0.00026962	0.00032221	0.836783	0	1	1	false
PROKKA_03376	Amino acid biosynthesis	Aspartate family	diaminopimelate epimerase	Diaminopimelate epimerase	30 kDa	0.00029432				0.00035957		0.00029432	0.00035957	0.818533	0	1	1	false
PROKKA_03460	Amino acid biosynthesis	Glutamate family	glutamine synthetase, type I	Gamma-glutamylputrescine synthetase PuuA	51 kDa	0.00017737				0.00048754		0.00017737	0.00048754	0.363806	0	1	1	false
PROKKA_03488	Amino acid biosynthesis	Pyruvate family	threonine ammonia-lyase, biosynthetic	L-threonine dehydratase biosynthetic IlvA	55 kDa	0.00016118				9.8455e-05		0.00016118	9.8455e-05	1.63709	0	1	1	false
PROKKA_04780	Amino acid biosynthesis	Aspartate family	succinyl-diaminopimelate desuccinylase	Succinyl-diaminopimelate desuccinylase	41 kDa		0.00028299			0.00019434		0.00028299	0.00019434	1.45616	0	1	1	false
PROKKA_01072	Amino acid biosynthesis	Histidine family	histidinol dehydrogenase	Histidinol dehydrogenase	47 kDa	0.00018546	0.00041243			0.00016994		0.000298945	0.00016994	1.75912	0	2	1	false
PROKKA_04043	Amino acid biosynthesis	Glutamate family	ornithine carbamoyltransferase	Ornithine carbamoyltransferase 1, phaseolotoxin-sensitive	34 kDa	0.00052921	0.00035305				0.00019361	0.00044113	0.00019361	2.27845	0	2	1	false
PROKKA_04034	Amino acid biosynthesis	Glutamate family	argininosuccinate synthase	Argininosuccinate synthase	45 kDa	0.00040115	0.00026762	0.0014883		0.00042882		0.000719023	0.00042882	1.67675	0	3	1	false
PROKKA_05356	Amino acid biosynthesis	Aromatic amino acid family	3-deoxy-7-phosphoheptulonate synthase	Phospho-2-dehydro-3-deoxyheptonate aldolase, Tyr-sensitive	39 kDa	0.0015884	0.0019174	0.0016837		0.00041582		0.00172983	0.00041582	4.16005	0	3	1	false
PROKKA_03771	Amino acid biosynthesis	Pyruvate family	acetolactate synthase, small subunit	Acetolactate synthase isozyme 3 small subunit	18 kDa				0.00052977	0.00030442			0.000417095	on UT	0	off	2	false
PROKKA_02986	Amino acid biosynthesis	Histidine family	-	Imidazoleglycerol-phosphate dehydratase	22 kDa					0.00050377	0.00045259		0.00047818	on UT	0	off	2	false
PROKKA_02503	Amino acid biosynthesis	Pyruvate family	alanine dehydrogenase	L-lysine cyclodeaminase	38 kDa					0.00014259	0.0001708		0.000156695	on UT	0	off	2	false
PROKKA_01540	Amino acid biosynthesis	Serine family	sulfite reductase [NADPH] flavoprotein, alpha-component	Sulfite reductase [NADPH] flavoprotein alpha-component	16 kDa					0.00032862	0.00039364		0.00036113	on UT	0	off	2	false
PROKKA_00484	Amino acid biosynthesis	Aspartate family	methylenetetrahydrofolate reductase [NAD(P)H]	5,10-methylenetetrahydrofolate reductase	31 kDa		0.00025714		0.0003073	0.00026488		0.00025714	0.00028609	0.898808	0	1	2	false
PROKKA_04707	Amino acid biosynthesis	Aromatic amino acid family	anthranilate synthase component I	Anthranilate synthase component 1	54 kDa		0.00014657			0.00035228	0.00018085	0.00014657	0.000266565	0.549847	0	1	2	false
PROKKA_00412	Amino acid biosynthesis	Pyruvate family	dihydroxy-acid dehydratase	Dihydroxy-acid dehydratase	66 kDa	0.00026504				0.00024284	0.00014545	0.00026504	0.000194145	1.36517	0	1	2	false
PROKKA_04397	Amino acid biosynthesis	Aromatic amino acid family	shikimate dehydrogenase	Shikimate 5-dehydrogenase-like protein	29 kDa	0.00029865				0.00036486	0.00032779	0.00029865	0.000346325	0.86234	0	1	2	false
PROKKA_01465	Amino acid biosynthesis	Pyruvate family	2-isopropylmalate synthase	2-isopropylmalate synthase	62 kDa	0.0003633	0.00051705			0.0002663	0.00010633	0.000440175	0.000186315	2.36253	1	2	2	true
PROKKA_01071	Amino acid biosynthesis	Histidine family	ATP phosphoribosyltransferase	ATP phosphoribosyltransferase	23 kDa	0.00154	0.00051368			0.00094069	0.00070426	0.00102684	0.000822475	1.24848	0	2	2	true
PROKKA_03180	Amino acid biosynthesis	Histidine family	ATP phosphoribosyltransferase, regulatory subunit	ATP phosphoribosyltransferase regulatory subunit	43 kDa	0.00092544	0.001189			0.0013819	0.00067716	0.00105722	0.00102953	1.0269	0	2	2	true
PROKKA_02265	Amino acid biosynthesis	Serine family	cysteine synthase A	Cysteine synthase A	34 kDa	0.00037608	0.00022302			0.00015315	0.00027518	0.00029955	0.000214165	1.39869	0	2	2	true
PROKKA_03077	Amino acid biosynthesis	Glutamate family	formylmethanofuran dehydrogenase subunit C	Glutamate synthase [NADPH] large chain precursor	162 kDa	0.0003291	4.879e-05			0.00016753	0.00022074	0.000188945	0.000194135	0.973266	0	2	2	true
PROKKA_04180	Amino acid biosynthesis	Aspartate family	methionine synthase	Methionine synthase	136 kDa	0.00023003	8.7691e-05			0.00010037	7.2136e-05	0.00015886	8.6253e-05	1.8418	0	2	2	true
PROKKA_05541	Amino acid biosynthesis	Aspartate family	O-succinylhomoserine sulfhydrylase	O-succinylhomoserine sulfhydrylase	43 kDa	0.00060471	0.00026895		0.00042855	0.00024626		0.00043683	0.000337405	1.29468	0	2	2	true
PROKKA_04490	Amino acid biosynthesis	Serine family	phosphoserine transaminase	Phosphoserine aminotransferase	36 kDa	0.00087752	0.00066905			0.00076576	0.001009	0.000773285	0.00088738	0.871425	0	2	2	true
PROKKA_03160	Amino acid biosynthesis	Serine family	phosphoserine phosphatase SerB	Phosphoserine phosphatase	44 kDa	0.00040214	0.00035771		0.00032062	0.00024565		0.000379925	0.000283135	1.34185	1	2	2	true
PROKKA_00590	Amino acid biosynthesis	Aromatic amino acid family	shikimate dehydrogenase	Shikimate dehydrogenase	29 kDa	0.0005973	0.00053131		0.00031747		0.00021853	0.000564305	0.000268	2.10562	1	2	2	true
PROKKA_02343	Amino acid biosynthesis	Aspartate family	4-hydroxy-tetrahydrodipicolinate synthase	4-hydroxy-tetrahydrodipicolinate synthase	31 kDa	0.0011128	0.00061864	0.0020643		0.00067974	0.00091602	0.00126525	0.00079788	1.58576	0	3	2	true
PROKKA_03075	Amino acid biosynthesis	Aromatic amino acid family	3-dehydroquinate synthase	3-dehydroquinate synthase	40 kDa				0.00047187	0.00040673	0.0001624		0.000347	on UT	0	off	3	false
PROKKA_01520	Amino acid biosynthesis	Histidine family	histidinol-phosphate transaminase	Histidinol-phosphate aminotransferase 2	39 kDa				0.00071961	0.0013094	0.00090811		0.00097904	on UT	0	off	3	false
PROKKA_02584	Amino acid biosynthesis	Aspartate family	homocitrate synthase	Hydroxymethylglutaryl-CoA lyase YngG	31 kDa				0.00028784	0.00049621	0.00039626		0.000393437	on UT	0	off	3	false
PROKKA_05654	Amino acid biosynthesis	Glutamate family	2-dehydro-3-deoxyphosphogluconate aldolase/4-hydroxy-2-oxoglutarate aldolase	2-dehydro-3-deoxy-phosphogluconate aldolase	23 kDa		0.0021252		0.0019537	0.0023576	0.0028241	0.0021252	0.00237847	0.893517	0	1	3	false
PROKKA_03335	Amino acid biosynthesis	Glutamate family	acetylglutamate kinase	Acetylglutamate kinase	32 kDa	0.00053976			0.00043033	0.00041214	0.00039495	0.00053976	0.000412473	1.30859	0	1	3	false
PROKKA_00905	Amino acid biosynthesis	Aromatic amino acid family	tryptophan synthase, alpha subunit	Tryptophan synthase alpha chain	28 kDa		0.00040747		0.0024348	0.0022385	0.0018994	0.00040747	0.0021909	0.185983	0	1	3	false
PROKKA_02989	Amino acid biosynthesis	Histidine family	1-(5-phosphoribosyl)-5-[(5-phosphoribosylamino)methylideneamino]imidazole-4-carboxamide isomerase	1-(5-phosphoribosyl)-5-[(5-phosphoribosylamino)methylideneamino] imidazole-4-carboxamide isomerase	26 kDa	0.00049735	0.0014746		0.00052869	0.00060761	0.00072783	0.000985975	0.000621377	1.58676	0	2	3	true
PROKKA_03386	Amino acid biosynthesis	Glutamate family	argininosuccinate lyase	Argininosuccinate lyase 1	52 kDa	0.00035014		0.0019486	0.00037221	0.0016041	0.0019856	0.00114937	0.00132064	0.870315	0	2	3	true
PROKKA_05531	Amino acid biosynthesis	Aspartate family	aspartate-semialdehyde dehydrogenase	Aspartate-semialdehyde dehydrogenase	41 kDa	0.0013173	0.0010741		0.00070016	0.0014752	0.00096389	0.0011957	0.00104642	1.14266	0	2	3	true
PROKKA_02506	Amino acid biosynthesis	Pyruvate family	branched-chain amino acid aminotransferase	Branched-chain-amino-acid aminotransferase	37 kDa	0.0023963	0.0021315		0.0019105	0.0040985	0.0029807	0.0022639	0.00299657	0.755498	0	2	3	true
PROKKA_04321	Amino acid biosynthesis	Aromatic amino acid family	shikimate dehydrogenase	Carboxynorspermidine synthase	48 kDa	0.00092944	0.0006614		0.0001976	0.00079485	0.0007481	0.00079542	0.000580183	1.37098	0	2	3	true
PROKKA_04721	Amino acid biosynthesis	Glutamate family	N-acetyl-gamma-glutamyl-phosphate reductase	N-acetyl-gamma-glutamyl-phosphate reductase	37 kDa	0.0015349	0.0015754		0.0015062	0.0012261	0.0015551	0.00155515	0.00142913	1.08818	0	2	3	true
PROKKA_00578	Amino acid biosynthesis	Aromatic amino acid family	tryptophan synthase, beta subunit	Tryptophan synthase beta chain	44 kDa	0.0014933	0.00088551		0.00052912	0.0015811	0.00065558	0.0011894	0.000921933	1.29012	0	2	3	true
PROKKA_01326	Amino acid biosynthesis	Histidine family	histidinol-phosphate transaminase	Aromatic-amino-acid aminotransferase	43 kDa	0.002041	0.00090776	0.0022717	0.0006509	0.0021195	0.0018668	0.00174015	0.00154573	1.12578	0	3	3	true
PROKKA_01890	Amino acid biosynthesis	Aspartate family	aspartate kinase	Aspartokinase	44 kDa	0.0011801	0.0012247	0.002919	0.00094089	0.0013817	0.0015112	0.0017746	0.00127793	1.38865	0	3	3	true
PROKKA_03481	Amino acid biosynthesis	Serine family	phosphoglycerate dehydrogenase	D-3-phosphoglycerate dehydrogenase	44 kDa	0.0027806	0.00371	0.0073688	0.001689	0.0029118	0.0024706	0.0046198	0.00235713	1.95992	0	3	3	true
PROKKA_03377	Amino acid biosynthesis	Aspartate family	diaminopimelate decarboxylase	Diaminopimelate decarboxylase	45 kDa	0.0012723	0.00095763	0.0014524	0.00041616	0.00035871	0.00035807	0.00122744	0.000377647	3.25024	1	3	3	true
PROKKA_03005	Amino acid biosynthesis	Glutamate family	glutamine synthetase, type I	Glutamine synthetase	52 kDa	0.0013886	0.00046319	0.0032199	0.00046129	0.0024917	0.0012701	0.00169056	0.0014077	1.20094	0	3	3	true
PROKKA_03772	Amino acid biosynthesis	Pyruvate family	ketol-acid reductoisomerase	Ketol-acid reductoisomerase	36 kDa	0.0060084	0.0042756	0.002675	0.0033213	0.004184	0.0040447	0.00431967	0.00385	1.12199	0	3	3	true
PROKKA_05608	Amino acid biosynthesis	Glutamate family	ornithine carbamoyltransferase	Ornithine carbamoyltransferase, catabolic	38 kDa	0.0094289	0.0045161	0.0089697	0.003598	0.0035444	0.0034496	0.00763823	0.00353067	2.1634	1	3	3	true
PROKKA_00579	Amino acid biosynthesis	Aromatic amino acid family	tryptophan synthase, alpha subunit	Tryptophan synthase alpha chain	28 kDa	0.0010569	0.0010745	0.0022408	0.00080253	0.0010146	0.0012153	0.0014574	0.00101081	1.44181	0	3	3	true
PROKKA_01482	Biosynthesis of cofactors, prosthetic groups, and carriers	Other	FeS cluster assembly scaffold IscU	NifU-like protein	14 kDa		0.001129					0.001129			0	1	off	false
PROKKA_04176	Biosynthesis of cofactors, prosthetic groups, and carriers	Heme, porphyrin, and cobalamin	precorrin-4 C11-methyltransferase	Precorrin-4 C(11)-methyltransferase	27 kDa	0.00032755						0.00032755			0	1	off	false
PROKKA_03339	Biosynthesis of cofactors, prosthetic groups, and carriers	Pantothenate and coenzyme A	phosphopantothenoylcysteine decarboxylase / phosphopantothenate--cysteine ligase	Coenzyme A biosynthesis bifunctional protein CoaBC	43 kDa	0.00080829	0.00062911					0.0007187		on T	0	2	off	false
PROKKA_03089	Biosynthesis of cofactors, prosthetic groups, and carriers	Chlorophyll and bacteriochlorphyll	geranylgeranyl reductase family	p-hydroxybenzoate hydroxylase	46 kDa	0.00019574	0.00017411					0.000184925		on T	0	2	off	false
PROKKA_00435	Biosynthesis of cofactors, prosthetic groups, and carriers	Pyridoxine	pyridoxal 5'-phosphate synthase, synthase subunit Pdx1	Thiazole synthase	28 kDa	0.00046155	0.00068426					0.000572905		on T	0	2	off	false
PROKKA_02053	Biosynthesis of cofactors, prosthetic groups, and carriers	Folic acid	aminodeoxychorismate synthase, component I	Aminodeoxychorismate synthase component 1	49 kDa				0.00019318				0.00019318		0	off	1	false
PROKKA_03353	Biosynthesis of cofactors, prosthetic groups, and carriers	Thiamine	glycine oxidase ThiO	D-amino acid dehydrogenase small subunit	47 kDa						0.00027455		0.00027455		0	off	1	false
PROKKA_03863	Biosynthesis of cofactors, prosthetic groups, and carriers	Heme, porphyrin, and cobalamin	ferrochelatase	Ferrochelatase	38 kDa				0.00025323				0.00025323		0	off	1	false
PROKKA_01825	Biosynthesis of cofactors, prosthetic groups, and carriers	Biotin	adenosylmethionine-8-amino-7-oxononanoate transaminase	Omega-amino acid--pyruvate aminotransferase	49 kDa				0.00038464				0.00038464		0	off	1	false
PROKKA_03749	Biosynthesis of cofactors, prosthetic groups, and carriers	Pantothenate and coenzyme A	pantoate--beta-alanine ligase	Pantothenate synthetase	31 kDa						0.00021003		0.00021003		0	off	1	false
PROKKA_03545	Biosynthesis of cofactors, prosthetic groups, and carriers	Riboflavin, FMN, and FAD	riboflavin synthase, alpha subunit	Riboflavin synthase	23 kDa				0.00058877				0.00058877		0	off	1	false
PROKKA_04763	Biosynthesis of cofactors, prosthetic groups, and carriers	Other	1-deoxy-D-xylulose 5-phosphate reductoisomerase	1-deoxy-D-xylulose 5-phosphate reductoisomerase	42 kDa		0.00036494		0.00021806			0.00036494	0.00021806	1.67358	0	1	1	false
PROKKA_03750	Biosynthesis of cofactors, prosthetic groups, and carriers	Pantothenate and coenzyme A	3-methyl-2-oxobutanoate hydroxymethyltransferase	3-methyl-2-oxobutanoate hydroxymethyltransferase	28 kDa		0.00027164		0.00032463			0.00027164	0.00032463	0.836768	0	1	1	false
PROKKA_03878	Biosynthesis of cofactors, prosthetic groups, and carriers	Other	4-hydroxy-3-methylbut-2-enyl diphosphate reductase	4-hydroxy-3-methylbut-2-enyl diphosphate reductase	35 kDa	0.00025788					0.0001887	0.00025788	0.0001887	1.36661	0	1	1	false
PROKKA_00371	Biosynthesis of cofactors, prosthetic groups, and carriers	Molybdopterin	molybdenum cofactor biosynthesis protein B	Molybdenum cofactor biosynthesis protein B	19 kDa		0.00060551			0.00055443		0.00060551	0.00055443	1.09213	0	1	1	false
PROKKA_04334	Biosynthesis of cofactors, prosthetic groups, and carriers	Other	iron-sulfur cluster repair di-iron protein	DNA nickase	18 kDa	0.0017995	0.0052592		0.00054654			0.00352935	0.00054654	6.45762	0	2	1	false
PROKKA_00971	Biosynthesis of cofactors, prosthetic groups, and carriers	Pyridine nucleotides	nicotinate-nucleotide diphosphorylase (carboxylating)	Nicotinate-nucleotide pyrophosphorylase [carboxylating]	30 kDa	0.00057612	0.0007687			0.00026394		0.00067241	0.00026394	2.54759	0	2	1	false
PROKKA_03546	Biosynthesis of cofactors, prosthetic groups, and carriers	Riboflavin, FMN, and FAD	3,4-dihydroxy-2-butanone-4-phosphate synthase	Riboflavin biosynthesis protein RibBA	39 kDa	0.00033567	0.00029858				0.00016375	0.000317125	0.00016375	1.93664	0	2	1	false
PROKKA_04184	Biosynthesis of cofactors, prosthetic groups, and carriers	Heme, porphyrin, and cobalamin	precorrin-3B synthase	Sulfite reductase [ferredoxin]	62 kDa	0.00044149	0.00032725		0.00015644			0.00038437	0.00015644	2.45698	0	2	1	false
PROKKA_01985	Biosynthesis of cofactors, prosthetic groups, and carriers	Heme, porphyrin, and cobalamin	oxygen-independent coproporphyrinogen III oxidase	Oxygen-independent coproporphyrinogen-III oxidase	52 kDa	0.0011479	0.0003927	0.0013104		0.00032362		0.000950333	0.00032362	2.93657	0	3	1	false
PROKKA_02509	Biosynthesis of cofactors, prosthetic groups, and carriers	Other	1-deoxy-D-xylulose-5-phosphate synthase	2-oxoisovalerate dehydrogenase subunit beta	38 kDa					0.00098678	0.00042216		0.00070447	on UT	0	off	2	false
PROKKA_05499	Biosynthesis of cofactors, prosthetic groups, and carriers	Biotin	dethiobiotin synthase	ATP-dependent dethiobiotin synthetase BioD 1	23 kDa					0.00043913	0.00039451		0.00041682	on UT	0	off	2	false
PROKKA_05004	Biosynthesis of cofactors, prosthetic groups, and carriers	Glutathione and analogs	gamma-glutamyltransferase	Gamma-glutamyltranspeptidase precursor	61 kDa				0.00022566	8.6448e-05			0.000156054	on UT	0	off	2	false
PROKKA_02355	Biosynthesis of cofactors, prosthetic groups, and carriers	Other	folate-binding protein YgfZ	tRNA-modifying protein YgfZ	34 kDa					0.00015853	0.0001899		0.000174215	on UT	0	off	2	false
PROKKA_02094	Biosynthesis of cofactors, prosthetic groups, and carriers	Chlorophyll and bacteriochlorphyll	geranylgeranyl reductase family	Electron transfer flavoprotein-ubiquinone oxidoreductase	61 kDa	0.00029326				0.00022392	0.00010729	0.00029326	0.000165605	1.77084	0	1	2	false
PROKKA_03811	Biosynthesis of cofactors, prosthetic groups, and carriers	Glutathione and analogs	gamma-glutamyltransferase	Gamma-glutamyltranspeptidase precursor	63 kDa		0.00017975			0.00016458	0.00014786	0.00017975	0.00015622	1.15062	0	1	2	false
PROKKA_03079	Biosynthesis of cofactors, prosthetic groups, and carriers	Heme, porphyrin, and cobalamin	uroporphyrinogen decarboxylase	Uroporphyrinogen decarboxylase	39 kDa		0.00030531			0.00013978	0.00016744	0.00030531	0.00015361	1.98757	0	1	2	false
PROKKA_03437	Biosynthesis of cofactors, prosthetic groups, and carriers	Menaquinone and ubiquinone	ubiquinone biosynthesis hydroxylase, UbiH/UbiF/VisC/COQ6 family	2-octaprenylphenol hydroxylase	45 kDa	0.00049898	0.00044384			0.00036576	0.00043813	0.00047141	0.000401945	1.17282	1	2	2	true
PROKKA_03556	Biosynthesis of cofactors, prosthetic groups, and carriers	Menaquinone and ubiquinone	heptaprenyl diphosphate synthase component II	Farnesyl diphosphate synthase	31 kDa	0.00055073	0.00036741		0.00029272	0.00050462		0.00045907	0.00039867	1.1515	0	2	2	true
PROKKA_02284	Biosynthesis of cofactors, prosthetic groups, and carriers	Heme, porphyrin, and cobalamin	5,6-dimethylbenzimidazole synthase	malonic semialdehyde reductase	22 kDa	0.00061853	0.00055018		0.0010958	0.00037783		0.000584355	0.000736815	0.793082	0	2	2	true
PROKKA_03204	Biosynthesis of cofactors, prosthetic groups, and carriers	Pyridine nucleotides	NAD+ synthetase	NH(3)-dependent NAD(+) synthetase	30 kDa	0.00073848	0.00065689			0.00063154	0.00054036	0.000697685	0.00058595	1.19069	1	2	2	true
PROKKA_01615	Biosynthesis of cofactors, prosthetic groups, and carriers	Pyridoxine	pyridoxine 5'-phosphate synthase	Pyridoxine 5'-phosphate synthase	27 kDa	0.0008222	0.00058508		0.0012236	0.00050224		0.00070364	0.00086292	0.815417	0	2	2	true
PROKKA_04486	Biosynthesis of cofactors, prosthetic groups, and carriers	Menaquinone and ubiquinone	3-demethylubiquinone-9 3-O-methyltransferase	Ubiquinone biosynthesis O-methyltransferase	26 kDa	0.00052522	0.00093436		0.00074442	0.00032083		0.00072979	0.000532625	1.37018	0	2	2	true
PROKKA_04172	Biosynthesis of cofactors, prosthetic groups, and carriers	Heme, porphyrin, and cobalamin	cobalamin biosynthesis protein CobW	Putative metal chaperone YciC	38 kDa				0.00061156	0.00028114	0.00033677		0.000409823	on UT	0	off	3	false
PROKKA_04654	Biosynthesis of cofactors, prosthetic groups, and carriers	Heme, porphyrin, and cobalamin	5,6-dimethylbenzimidazole synthase	Putative NAD(P)H nitroreductase YdjA	20 kDa		0.0011592		0.0025398	0.0014594	0.0020661	0.0011592	0.00202177	0.57336	0	1	3	false
PROKKA_04743	Biosynthesis of cofactors, prosthetic groups, and carriers	Other	2-C-methyl-D-erythritol 2,4-cyclodiphosphate synthase	2-C-methyl-D-erythritol 2,4-cyclodiphosphate synthase	17 kDa	0.0018109	0.0016108		0.0022001	0.00031606	0.0003786	0.00171085	0.00096492	1.77305	0	2	3	true
PROKKA_03547	Biosynthesis of cofactors, prosthetic groups, and carriers	Riboflavin, FMN, and FAD	6,7-dimethyl-8-ribityllumazine synthase	6,7-dimethyl-8-ribityllumazine synthase	16 kDa	0.0043701	0.0034299		0.0065584	0.0031406	0.003762	0.0039	0.004487	0.869178	0	2	3	true
PROKKA_04383	Biosynthesis of cofactors, prosthetic groups, and carriers	Heme, porphyrin, and cobalamin	-	Delta-aminolevulinic acid dehydratase	35 kDa	0.0010029	0.00066905		0.00053304	0.0003063	0.00027518	0.000835975	0.000371507	2.25023	0	2	3	true
PROKKA_00455	Biosynthesis of cofactors, prosthetic groups, and carriers	Glutathione and analogs	glutathione synthase	Glutathione synthetase	35 kDa	0.00064064	0.00068382		0.00068101	0.00086094	0.00065627	0.00066223	0.00073274	0.903772	0	2	3	true
PROKKA_01888	Biosynthesis of cofactors, prosthetic groups, and carriers	Biotin	8-amino-7-oxononanoate synthase	Low specificity L-threonine aldolase	36 kDa	0.00048643	0.00075719		0.00051708	0.00074283	0.00017796	0.00062181	0.00047929	1.29736	0	2	3	true
PROKKA_03147	Biosynthesis of cofactors, prosthetic groups, and carriers	Thiamine	phosphomethylpyrimidine synthase	Phosphomethylpyrimidine synthase	70 kDa	0.0014735	0.0011397		0.00034051	0.0009392	0.0006094	0.0013066	0.000629703	2.07495	0	2	3	true
PROKKA_00418	Biosynthesis of cofactors, prosthetic groups, and carriers	Pantothenate and coenzyme A	pantetheine-phosphate adenylyltransferase	Phosphopantetheine adenylyltransferase	18 kDa	0.0005109	0.0011361		0.0013577	0.00078021	0.0018692	0.0008235	0.0013357	0.616529	0	2	3	true
PROKKA_03388	Biosynthesis of cofactors, prosthetic groups, and carriers	Heme, porphyrin, and cobalamin	hydroxymethylbilane synthase	Porphobilinogen deaminase	34 kDa	0.001687	0.0011543		0.0013794	0.0009512	0.00066466	0.00142065	0.00099842	1.4229	0	2	3	true
PROKKA_00427	Biosynthesis of cofactors, prosthetic groups, and carriers	Other	coenzyme PQQ biosynthesis protein PqqF	Protease 3 precursor	50 kDa	0.00054035	0.00072097		0.00047867	0.00038509	0.00039539	0.00063066	0.000419717	1.50259	0	2	3	true
PROKKA_03405	Biosynthesis of cofactors, prosthetic groups, and carriers	Heme, porphyrin, and cobalamin	-	Delta-aminolevulinic acid dehydratase	37 kDa	0.00036157	0.00075045	0.0017886	0.00025624	0.00014724	0.00026457	0.000966873	0.000222683	4.34192	1	3	3	true
PROKKA_04928	Biosynthesis of cofactors, prosthetic groups, and carriers	Menaquinone and ubiquinone	solanesyl diphosphate synthase	Octaprenyl-diphosphate synthase	35 kDa	0.0017659	0.0014586	0.0018719	0.00093862	0.001464	0.0011999	0.0016988	0.00120084	1.41468	0	3	3	true
PROKKA_00635	Cell envelope	Biosynthesis and degradation of murein sacculus and peptidoglycan	glutamine-fructose-6-phosphate transaminase (isomerizing)	Glutamine--fructose-6-phosphate aminotransferase [isomerizing]	66 kDa	0.00013317						0.00013317			0	1	off	false
PROKKA_04699	Cell envelope	Biosynthesis and degradation of surface polysaccharides and lipopolysaccharides	lipopolysaccharide transport periplasmic protein LptA	LPS-assembly protein LptD precursor	104 kDa	0.00021979						0.00021979			0	1	off	false
PROKKA_01908	Cell envelope	Other	putative membrane-bound dehydrogenase domain	Membrane bound L-sorbosone dehydrogenase	47 kDa	0.00037178	0.0003307					0.00035124		on T	0	2	off	false
PROKKA_02411	Cell envelope	Biosynthesis and degradation of murein sacculus and peptidoglycan	-	Membrane-bound lytic murein transglycosylase A precursor	43 kDa	0.00020462	0.00054603					0.000375325		on T	0	2	off	false
PROKKA_00633	Cell envelope	Biosynthesis and degradation of murein sacculus and peptidoglycan	UDP-N-acetylglucosamine diphosphorylase/glucosamine-1-phosphate N-acetyltransferase	Bifunctional protein GlmU	49 kDa				0.00018979				0.00018979		0	off	1	false
PROKKA_03735	Cell envelope	Biosynthesis and degradation of murein sacculus and peptidoglycan	phosphoglucosamine mutase	Phosphoglucosamine mutase	48 kDa						0.00013357		0.00013357		0	off	1	false
PROKKA_04759	Cell envelope	Biosynthesis and degradation of surface polysaccharides and lipopolysaccharides	UDP-3-O-[3-hydroxymyristoyl] glucosamine N-acyltransferase LpxD	UDP-3-O-acylglucosamine N-acyltransferase	36 kDa				0.00024602				0.00024602		0	off	1	false
PROKKA_01121	Cell envelope	Biosynthesis and degradation of murein sacculus and peptidoglycan	D-alanine--D-alanine ligase	D-alanine--D-alanine ligase	34 kDa	0.00025545	0.00022722			0.00023406		0.000241335	0.00023406	1.03108	0	2	1	false
PROKKA_04822	Cell envelope	Biosynthesis and degradation of surface polysaccharides and lipopolysaccharides	-	Glucans biosynthesis protein D precursor	61 kDa	0.00037538	0.00033391			9.1721e-05		0.000354645	9.1721e-05	3.86656	0	2	1	false
PROKKA_03137	Cell envelope	Biosynthesis and degradation of surface polysaccharides and lipopolysaccharides	lipid A export permease/ATP-binding protein MsbA	Lipid A export ATP-binding/permease protein MsbA	70 kDa	0.00012793	0.00011379			0.00019536		0.00012086	0.00019536	0.618653	0	2	1	false
PROKKA_03069	Cell envelope	Biosynthesis and degradation of murein sacculus and peptidoglycan	penicillin-binding protein, 1A family	Penicillin-binding protein 1A	89 kDa	0.0001486	0.0002203			6.0514e-05		0.00018445	6.0514e-05	3.04805	0	2	1	false
PROKKA_04757	Cell envelope	Biosynthesis and degradation of surface polysaccharides and lipopolysaccharides	acyl-[acyl-carrier-protein]-UDP-N-acetylglucosamine O-acyltransferase	Acyl-[acyl-carrier-protein]--UDP-N-acetylglucosamine O-acyltransferase	28 kDa					0.0002885	0.00023039		0.000259445	on UT	0	off	2	false
PROKKA_02911	Cell envelope	Other	lipoprotein, YaeC family	D-methionine-binding lipoprotein MetQ precursor	28 kDa				0.00049819		0.00022861		0.0003634	on UT	0	off	2	false
PROKKA_01061	Cell envelope	Biosynthesis and degradation of surface polysaccharides and lipopolysaccharides	LPS export ABC transporter periplasmic protein LptC	lipopolysaccharide exporter periplasmic protein	21 kDa					0.00039175	0.00031284		0.000352295	on UT	0	off	2	false
PROKKA_00908	Cell envelope	Biosynthesis and degradation of surface polysaccharides and lipopolysaccharides	nucleotide sugar dehydrogenase	UDP-N-acetyl-D-glucosamine 6-dehydrogenase	48 kDa					0.00040389	0.00027646		0.000340175	on UT	0	off	2	false
PROKKA_02830	Cell envelope	Other	sugar transferase, PEP-CTERM/EpsH1 system associated	Capsular glucan synthase	56 kDa	0.00032235				0.00068918	0.00047174	0.00032235	0.00058046	0.555335	0	1	2	false
PROKKA_01059	Cell envelope	Biosynthesis and degradation of surface polysaccharides and lipopolysaccharides	LPS export ABC transporter ATP-binding protein	Lipopolysaccharide export system ATP-binding protein LptB	27 kDa		0.00059965		0.00053746	0.00072064		0.00059965	0.00062905	0.953263	0	1	2	false
PROKKA_04750	Cell envelope	Biosynthesis and degradation of surface polysaccharides and lipopolysaccharides	3-deoxy-8-phosphooctulonate synthase	2-dehydro-3-deoxyphosphooctonate aldolase	31 kDa	0.00028909	0.00025714		0.0003073		0.00031729	0.000273115	0.000312295	0.874542	1	2	2	true
PROKKA_04440	Cell envelope	Biosynthesis and degradation of surface polysaccharides and lipopolysaccharides	polysaccharide chain length determinant protein, PEP-CTERM locus subfamily	Chain length determinant protein	74 kDa	0.00061262	0.00032696			0.00041164	0.00044826	0.00046979	0.00042995	1.09266	0	2	2	true
PROKKA_03034	Cell envelope	Biosynthesis and degradation of surface polysaccharides and lipopolysaccharides	cellulose synthase catalytic subunit (UDP-forming)	Glucans biosynthesis glucosyltransferase H	96 kDa	0.00037959	8.4413e-05			0.00026086	0.00013888	0.000232002	0.00019987	1.16076	0	2	2	true
PROKKA_04088	Cell envelope	Other	-	Lipoteichoic acid synthase 1	78 kDa	0.00064285	0.0003119			0.00049978	0.00042762	0.000477375	0.0004637	1.02949	0	2	2	true
PROKKA_01114	Cell envelope	Biosynthesis and degradation of murein sacculus and peptidoglycan	UDP-N-acetylmuramyl-tripeptide synthetase	UDP-N-acetylmuramoyl-L-alanyl-D-glutamate--2,6-diaminopimelate ligase	52 kDa	0.00058381	0.00037093			0.00040757	0.00024411	0.00047737	0.00032584	1.46504	0	2	2	true
PROKKA_01062	Cell envelope	Biosynthesis and degradation of surface polysaccharides and lipopolysaccharides	3-deoxy-D-manno-octulosonate 8-phosphate phosphatase, YrbI family	3-deoxy-D-manno-octulosonate 8-phosphate phosphatase KdsC	19 kDa		0.0020764		0.001737	0.00071295	0.0010248	0.0020764	0.00115825	1.7927	0	1	3	false
PROKKA_01060	Cell envelope	Biosynthesis and degradation of surface polysaccharides and lipopolysaccharides	lipopolysaccharide transport periplasmic protein LptA	Lipopolysaccharide export system protein LptA precursor	19 kDa		0.0012247		0.0012197	0.00042052	0.00067163	0.0012247	0.000770617	1.58925	0	1	3	false
PROKKA_00116	Cell envelope	Other	-	Outer membrane lipoprotein SlyB precursor	16 kDa		0.00070381		0.0008411	0.00032222	0.00057896	0.00070381	0.00058076	1.21188	0	1	3	false
PROKKA_05576	Cell envelope	Other	peptidoglycan-associated lipoprotein	Outer membrane protein P6 precursor	18 kDa		0.0028294		0.0031212	0.0010462	0.0012532	0.0028294	0.00180687	1.56592	0	1	3	false
PROKKA_02850	Cell envelope	Biosynthesis and degradation of surface polysaccharides and lipopolysaccharides	dTDP-4-dehydrorhamnose 3,5-epimerase	dTDP-4-dehydrorhamnose 3,5-epimerase	21 kDa	0.0013464	0.0011976		0.00071563	0.00095953	0.00098519	0.001272	0.000886783	1.4344	1	2	3	true
PROKKA_02851	Cell envelope	Biosynthesis and degradation of surface polysaccharides and lipopolysaccharides	dTDP-4-dehydrorhamnose reductase	dTDP-4-dehydrorhamnose reductase	32 kDa	0.00042163	0.00062506		0.0005976	0.0001717	0.00030851	0.000523345	0.00035927	1.45669	0	2	3	true
PROKKA_02848	Cell envelope	Biosynthesis and degradation of surface polysaccharides and lipopolysaccharides	dTDP-glucose 4,6-dehydratase	dTDP-glucose 4,6-dehydratase 2	40 kDa	0.00078977	0.00060215		0.00023987	0.00041351	0.00041278	0.00069596	0.000355387	1.95832	1	2	3	true
PROKKA_03768	Cell envelope	Surface structures	type IV pilus biogenesis/stability protein PilW	hypothetical protein	25 kDa	0.00049938	0.00088841		0.00088476	0.0006101	0.00097442	0.000693895	0.000823093	0.843033	0	2	3	true
PROKKA_03607	Cell envelope	Biosynthesis and degradation of surface polysaccharides and lipopolysaccharides	-	LPS-assembly lipoprotein RlpB	22 kDa	0.0010104	0.0016177		0.0012888	0.00049374	0.0011829	0.00131405	0.00098848	1.32936	0	2	3	true
PROKKA_00195	Cell envelope	Other	putative membrane-bound dehydrogenase domain	Membrane bound L-sorbosone dehydrogenase	46 kDa	0.00056674	0.00067216		0.00060246	0.0001154	0.00020735	0.00061945	0.000308403	2.00857	0	2	3	true
PROKKA_03597	Cell envelope	Biosynthesis and degradation of murein sacculus and peptidoglycan	lytic murein transglycosylase B	Membrane-bound lytic murein transglycosylase B precursor	38 kDa	0.00048067	0.00032067		0.00038322	0.00022021	0.00017586	0.00040067	0.000259763	1.54244	0	2	3	true
PROKKA_00546	Cell envelope	Other	lipoprotein, YaeC family	Methionine-binding lipoprotein MetQ precursor	28 kDa	0.00063463	0.0014113		0.0020239	0.00087225	0.0015092	0.00102297	0.00146845	0.696629	0	2	3	true
PROKKA_01108	Cell envelope	Biosynthesis and degradation of murein sacculus and peptidoglycan	-	Penicillin-binding protein activator LpoA precursor	65 kDa	0.0014819	0.0013181		0.00042962	0.00098749	0.00083787	0.0014	0.00075166	1.86254	1	2	3	true
PROKKA_01039	Cell envelope	Biosynthesis and degradation of murein sacculus and peptidoglycan	cell shape determining protein, MreB/Mrl family	Rod shape-determining protein MreB	37 kDa	0.0010596	0.00073305		0.00087604	0.0010787	0.0015506	0.000896325	0.00116845	0.767108	0	2	3	true
PROKKA_03138	Cell envelope	Biosynthesis and degradation of surface polysaccharides and lipopolysaccharides	bifunctional protein RfaE, domain I	Bifunctional protein HldE	50 kDa	0.001114	0.00053355	0.0012717	0.00018218	0.00026172	0.0004389	0.000973083	0.000294267	3.30681	1	3	3	true
PROKKA_03599	Cell envelope	Biosynthesis and degradation of murein sacculus and peptidoglycan	-	D-alanyl-D-alanine carboxypeptidase DacC precursor	42 kDa	0.0037979	0.0030968	0.0046969	0.0020186	0.00232	0.0022386	0.00386387	0.0021924	1.76239	1	3	3	true
PROKKA_03033	Cell envelope	Biosynthesis and degradation of surface polysaccharides and lipopolysaccharides	-	Glucans biosynthesis protein G precursor	65 kDa	0.0012649	0.0011876	0.0015643	0.0006723	0.00098727	0.00066844	0.00133893	0.000776003	1.72542	1	3	3	true
PROKKA_02849	Cell envelope	Biosynthesis and degradation of surface polysaccharides and lipopolysaccharides	glucose-1-phosphate thymidylyltransferase	Glucose-1-phosphate thymidylyltransferase 2	33 kDa	0.0023728	0.0017382	0.0020714	0.0017805	0.0018757	0.0014298	0.0020608	0.00169533	1.21557	0	3	3	true
PROKKA_03604	Cell envelope	Biosynthesis and degradation of murein sacculus and peptidoglycan	lytic murein transglycosylase	Membrane-bound lytic murein transglycosylase B precursor	47 kDa	0.00064471	0.0006554	0.0013668	0.00029372	0.00039382	0.00053914	0.00088897	0.000408893	2.17409	1	3	3	true
PROKKA_02028	Cell envelope	Other	peptidoglycan-associated lipoprotein	Outer membrane porin F precursor	35 kDa	0.0032394	0.0043222	0.0046224	0.0038408	0.0025876	0.0015498	0.00406133	0.0026594	1.52716	0	3	3	true
PROKKA_04804	Cell envelope	Other	peptidoglycan-associated lipoprotein	Outer membrane porin F precursor	29 kDa	0.010582	0.011766	0.011547	0.0087676	0.0062739	0.0060351	0.0112983	0.00702553	1.60818	1	3	3	true
PROKKA_02342	Cell envelope	Other	-	Outer membrane protein assembly factor BamC	40 kDa	0.0026275	0.0026293	0.0024371	0.0022112	0.0012706	0.0012016	0.00256463	0.00156113	1.6428	1	3	3	true
PROKKA_03534	Cell envelope	Other	-	Outer membrane protein W precursor	25 kDa	0.0010504	0.0015573	0.0025981	0.0020472	0.00085554	0.0016653	0.00173527	0.00152268	1.13961	0	3	3	true
PROKKA_01125	Cell envelope	Biosynthesis and degradation of surface polysaccharides and lipopolysaccharides	UDP-3-O-[3-hydroxymyristoyl] N-acetylglucosamine deacetylase	UDP-3-O-[3-hydroxymyristoyl] N-acetylglucosamine deacetylase	33 kDa	0.0013405	0.0014308	0.002984	0.001425	0.0017195	0.0013732	0.00191843	0.0015059	1.27394	0	3	3	true
PROKKA_01070	Cell envelope	Biosynthesis and degradation of murein sacculus and peptidoglycan	UDP-N-acetylglucosamine 1-carboxyvinyltransferase	UDP-N-acetylglucosamine 1-carboxyvinyltransferase	45 kDa	0.0014471	0.00060072	0.0014317	0.0007179	0.00041253	0.00049415	0.00115984	0.000541527	2.1418	0	3	3	true
PROKKA_05165	Cell envelope	Biosynthesis and degradation of surface polysaccharides and lipopolysaccharides	UTP--glucose-1-phosphate uridylyltransferase	UTP--glucose-1-phosphate uridylyltransferase	31 kDa	0.004513	0.0034963	0.0032407	0.001857	0.0025789	0.0013848	0.00375	0.00194023	1.93276	1	3	3	true
PROKKA_03705	Cellular processes	Adaptations to atypical conditions	-	Mrr restriction system protein	33 kDa		0.00023234					0.00023234			0	1	off	false
PROKKA_02437	Cellular processes	Adaptations to atypical conditions	choline dehydrogenase	Oxygen-dependent choline dehydrogenase	63 kDa	0.00014327						0.00014327			0	1	off	false
PROKKA_00156	Cellular processes	Adaptations to atypical conditions	-	Universal stress protein E	31 kDa		0.00050354					0.00050354			0	1	off	false
PROKKA_01123	Cellular processes	Cell division	cell division protein FtsA	Cell division protein FtsA	45 kDa	0.00048353	0.00034408					0.000413805		on T	0	2	off	false
PROKKA_04562	Cellular processes	Other	adhesin HecA family 20-residue repeat (two copies)	Filamentous hemagglutinin	279 kDa	2.9887e-05	2.6585e-05					2.8236e-05		on T	0	2	off	false
PROKKA_05339	Cellular processes	Chemotaxis and motility	-	Methyl-accepting chemotaxis protein McpS	52 kDa	0.00058142	0.00036941					0.000475415		on T	0	2	off	false
PROKKA_00173	Cellular processes	Toxin production and resistance	-	Beta-lactamase	41 kDa					0.00013058			0.00013058		0	off	1	false
PROKKA_03516	Cellular processes	Adaptations to atypical conditions	-	Catalase	54 kDa					0.00015442			0.00015442		0	off	1	false
PROKKA_02574	Cellular processes	Adaptations to atypical conditions	-	Catalase-related peroxidase precursor	38 kDa					0.00013784			0.00013784		0	off	1	false
PROKKA_01211	Cellular processes	Detoxification	heavy metal translocating P-type ATPase	Copper-transporting P-type ATPase	84 kDa						7.5719e-05		7.5719e-05		0	off	1	false
PROKKA_04282	Cellular processes	Toxin production and resistance	RND transporter, hydrophobe/amphiphile efflux-1 (HAE1) family	Efflux pump membrane transporter BepE	114 kDa				8.1619e-05				8.1619e-05		0	off	1	false
PROKKA_05581	Cellular processes	Other	adhesin HecA family 20-residue repeat (two copies)	Filamentous hemagglutinin	362 kDa					2.1254e-05			2.1254e-05		0	off	1	false
PROKKA_01756	Cellular processes	Chemotaxis and motility	flagellar motor switch protein FliM	Flagellar motor switch protein FliM	36 kDa						0.0001846		0.0001846		0	off	1	false
PROKKA_01755	Cellular processes	Chemotaxis and motility	flagellar motor switch protein FliN	Flagellar motor switch protein FliN	16 kDa				0.00055711				0.00055711		0	off	1	false
PROKKA_05548	Cellular processes	Chemotaxis and motility	-	Methyl-accepting chemotaxis protein PctA	68 kDa	0.00012915			0.00013729			0.00012915	0.00013729	0.940709	0	1	1	false
PROKKA_03387	Cellular processes	Sporulation and germination	sporulation transcription factor Spo0A	Sensory transduction protein LytR	27 kDa	0.00065511			0.0003482			0.00065511	0.0003482	1.88142	0	1	1	false
PROKKA_05110	Cellular processes	Chemotaxis and motility	-	Flagellar brake protein YcgR	28 kDa	0.00032624	0.00029019		0.0003468			0.000308215	0.0003468	0.88874	0	2	1	false
PROKKA_00073	Cellular processes	Detoxification	efflux transporter, outer membrane factor (OMF) lipoprotein, NodT family	putative efflux pump outer membrane protein TtgC precursor	53 kDa	0.00075371	0.00067043		0.00017805			0.00071207	0.00017805	3.99927	0	2	1	false
PROKKA_03345	Cellular processes	Adaptations to atypical conditions	betaine-aldehyde dehydrogenase	Aldehyde dehydrogenase PuuC	53 kDa		0.00021808			0.00069889	0.00041859	0.00021808	0.00055874	0.390307	0	1	2	false
PROKKA_03733	Cellular processes	Cell division	ATP-dependent metallopeptidase HflB	ATP-dependent zinc metalloprotease FtsH	69 kDa	0.00025425				7.7654e-05	0.00013953	0.00025425	0.000108592	2.34133	0	1	2	false
PROKKA_01804	Cellular processes	Adaptations to atypical conditions	putative glutathione peroxidase Gpx7	Hydroperoxy fatty acid reductase gpx1	20 kDa		0.00039485		0.0011797		0.0014616	0.00039485	0.00132065	0.298982	0	1	2	false
PROKKA_03673	Cellular processes	Adaptations to atypical conditions	large conductance mechanosensitive channel protein	Large-conductance mechanosensitive channel	15 kDa		0.0018326			0.0014383	0.0010768	0.0018326	0.00125755	1.45728	0	1	2	false
PROKKA_00072	Cellular processes	Toxin production and resistance	RND transporter, hydrophobe/amphiphile efflux-1 (HAE1) family	putative efflux pump membrane transporter TtgB	113 kDa	0.00019286				0.00025918	0.00025402	0.00019286	0.0002566	0.751598	0	1	2	false
PROKKA_02345	Cellular processes	Detoxification	peroxiredoxin	Putative peroxiredoxin bcp	17 kDa		0.00046024			0.00094818	0.0003786	0.00046024	0.00066339	0.69377	0	1	2	false
PROKKA_04999	Cellular processes	Pathogenesis	-	Bacterial virulence protein (VirJ)	46 kDa	0.00019069	0.00042405			0.00017472	0.00013953	0.00030737	0.000157125	1.95621	1	2	2	true
PROKKA_02001	Cellular processes	Cell division	cell division protein ZipA	Cell division protein ZipA	32 kDa	0.00056609	0.00050354			0.00043224	0.00020711	0.000534815	0.000319675	1.673	1	2	2	true
PROKKA_01778	Cellular processes	Chemotaxis and motility	flagellar hook-associated protein FlgK	Flagellar hook-associated protein 1	69 kDa	0.00011929	0.0001061			0.00018216	0.00017457	0.000112695	0.000178365	0.631822	1	2	2	true
PROKKA_04924	Cellular processes	Cell division	chromosome segregation protein SMC	Methyl-accepting chemotaxis protein McpS	69 kDa	0.00025425	0.00016962		0.00013514	0.00015531		0.000211935	0.000145225	1.45936	1	2	2	true
PROKKA_02393	Cellular processes	Chemotaxis and motility	-	Methyl-accepting chemotaxis protein PctB	67 kDa	0.00051906	0.00011543			0.00051524	0.00042728	0.000317245	0.00047126	0.673185	0	2	2	true
PROKKA_02616	Cellular processes	Adaptations to atypical conditions	betaine-aldehyde dehydrogenase	NADP-dependent glyceraldehyde-3-phosphate dehydrogenase	60 kDa		0.00013431	0.0011204		0.00073786	0.00060765	0.000627355	0.000672755	0.932516	0	2	2	true
PROKKA_00251	Cellular processes	Other	-	Acyl-homoserine lactone acylase PvdQ precursor	83 kDa				0.00022754	0.00013075	7.8313e-05		0.000145534	on UT	0	off	3	false
PROKKA_05595	Cellular processes	Pathogenesis	filamentous hemagglutinin family N-terminal domain	Hemolysin precursor	171 kDa				5.2303e-05	0.00031558	0.00018001		0.000182631	on UT	0	off	3	false
PROKKA_01052	Cellular processes	Adaptations to atypical conditions	-	Superoxide dismutase [Mn/Fe]	22 kDa				0.0012761	0.00073332	0.00087842		0.000962613	on UT	0	off	3	false
PROKKA_01449	Cellular processes	Adaptations to atypical conditions	-	Catalase	55 kDa	0.0023449	0.0014898		0.0010683	0.0019951	0.0012868	0.00191735	0.00145007	1.32225	0	2	3	true
PROKKA_01735	Cellular processes	Chemotaxis and motility	-	Chemotaxis protein CheW	18 kDa	0.0030462	0.0031613		0.0024287	0.0043419	0.005201	0.00310375	0.00399053	0.777778	0	2	3	true
PROKKA_01743	Cellular processes	Chemotaxis and motility	-	chemotaxis regulator CheZ	30 kDa	0.0010852	0.00082738		0.00049439	0.00066288	0.0011343	0.00095629	0.000763857	1.25192	0	2	3	true
PROKKA_05643	Cellular processes	Cell division	-	Chromosome partition protein Smc	29 kDa	0.00059294	0.00039557		0.00063031	0.0003622	0.00054233	0.000494255	0.000511613	0.966071	0	2	3	true
PROKKA_05563	Cellular processes	Adaptations to atypical conditions	-	DNA protection during starvation protein 2	18 kDa	0.0023283	0.0034518		0.0046751	0.0017383	0.0024609	0.00289005	0.0029581	0.976995	0	2	3	true
PROKKA_05101	Cellular processes	Chemotaxis and motility	flagellar hook-basal body protein	Flagellar hook protein FlgE	46 kDa	0.00037093	0.00041243		0.00019715	0.00028323	0.00020356	0.00039168	0.00022798	1.71805	1	2	3	true
PROKKA_01773	Cellular processes	Chemotaxis and motility	-	Flagellar hook-associated protein 2	48 kDa	0.00095671	0.00061891		0.0012944	0.0005844	0.0006364	0.00078781	0.0008384	0.939659	0	2	3	true
PROKKA_00253	Cellular processes	Adaptations to atypical conditions	-	heat-inducible protein	29 kDa	0.0015099	0.001746		0.0011235	0.0011068	0.0006629	0.00162795	0.0009644	1.68804	1	2	3	true
PROKKA_03612	Cellular processes	Chemotaxis and motility	gliding motility-associated protein GldE	Magnesium and cobalt efflux protein CorC	31 kDa	0.00087348	0.00051797		0.00077377	0.00053356	0.00063914	0.000695725	0.000648823	1.07229	0	2	3	true
PROKKA_01105	Cellular processes	Adaptations to atypical conditions	-	Osmotically-inducible protein Y precursor	20 kDa	0.00063135	0.0014976		0.0024608	0.0010284	0.0015399	0.00106448	0.00167637	0.634989	0	2	3	true
PROKKA_00572	Cellular processes	Detoxification	peroxiredoxin, OsmC subfamily	Peroxiredoxin OsmC	15 kDa	0.0042605	0.0037897		0.004529	0.0029495	0.0018705	0.0040251	0.00311633	1.29161	0	2	3	true
PROKKA_04126	Cellular processes	Cell division	septum site-determining protein MinD	Septum site-determining protein MinD	29 kDa	0.00075216	0.00040143		0.00047974	0.00036756	0.00066044	0.000576795	0.00050258	1.14767	0	2	3	true
PROKKA_03681	Cellular processes	Biosynthesis of natural products	fluorothreonine transaldolase	Serine hydroxymethyltransferase 2	45 kDa	0.00087662		0.0036137	0.0005177	0.0014279	0.00099779	0.00224516	0.00098113	2.28834	0	2	3	true
PROKKA_05639	Cellular processes	Adaptations to atypical conditions	-	Superoxide dismutase [Fe]	22 kDa	0.0028719	0.002737		0.0017445	0.0027567	0.0025517	0.00280445	0.00235097	1.19289	0	2	3	true
PROKKA_03577	Cellular processes	Adaptations to atypical conditions	betaine-aldehyde dehydrogenase	Aldehyde dehydrogenase B	55 kDa	0.0024081	0.001785	0.0011912	0.0022185	0.0047562	0.0029955	0.00179477	0.0033234	0.540039	0	3	3	true
PROKKA_05169	Cellular processes	Detoxification	peroxiredoxin	Alkyl hydroperoxide reductase subunit C	20 kDa	0.0047784	0.0040572	0.0032233	0.0064649	0.0062358	0.004609	0.00401963	0.0057699	0.696656	0	3	3	true
PROKKA_01775	Cellular processes	Chemotaxis and motility	flagellar hook-associated protein 3	B-type flagellin	49 kDa	0.0048707	0.0040388	0.0073508	0.0056164	0.0048411	0.0050137	0.0054201	0.00515707	1.051	0	3	3	true
PROKKA_00543	Cellular processes	Adaptations to atypical conditions	-	Catalase HPII	78 kDa	0.0026204	0.0016722	0.0021135	0.00036334	0.00090473	0.00066692	0.00213537	0.000644997	3.31066	1	3	3	true
PROKKA_01124	Cellular processes	Cell division	cell division protein FtsZ	Cell division protein FtsZ	42 kDa	0.00071436	0.00045388	0.0015145	0.00021697	0.00012468	0.00022402	0.000894247	0.000188557	4.74259	1	3	3	true
PROKKA_00991	Cellular processes	Adaptations to atypical conditions	-	Glycine betaine/carnitine/choline-binding protein OpuCC precursor	33 kDa	0.0013676	0.0013381	0.0020295	0.00087225	0.0010024	0.00080053	0.0015784	0.000891727	1.77005	1	3	3	true
PROKKA_03744	Cellular processes	Adaptations to atypical conditions	-	Osmotically-inducible protein Y precursor	21 kDa	0.013999	0.016661	0.01463	0.012156	0.0093943	0.012119	0.0150967	0.0112231	1.34514	1	3	3	true
PROKKA_04038	Cellular processes	Detoxification	peroxiredoxin	putative peroxiredoxin	22 kDa	0.0079202	0.0074064	0.016576	0.0060447	0.0074432	0.0086187	0.0106342	0.00736887	1.44313	0	3	3	true
PROKKA_03407	Central intermediary metabolism	Phosphorus compounds	exopolyphosphatase	Exopolyphosphatase	56 kDa		0.00021677					0.00021677			0	1	off	false
PROKKA_03406	Central intermediary metabolism	Phosphorus compounds	polyphosphate kinase 1	Polyphosphate kinase	83 kDa	0.00016466						0.00016466			0	1	off	false
PROKKA_02855	Central intermediary metabolism	Sulfur metabolism	3'(2'),5'-bisphosphate nucleotidase	3'(2'),5'-bisphosphate nucleotidase CysQ	30 kDa						0.00032072		0.00032072		0	off	1	false
PROKKA_02057	Central intermediary metabolism	Sulfur metabolism	5'-adenylylsulfate reductase, thioredoxin-independent	Phosphoadenosine phosphosulfate reductase	28 kDa						0.00024361		0.00024361		0	off	1	false
PROKKA_03207	Central intermediary metabolism	Other	succinate-semialdehyde dehydrogenase	Succinate-semialdehyde dehydrogenase [NADP(+)]	53 kDa					0.00050021	0.00023968		0.000369945	on UT	0	off	2	false
PROKKA_03753	Central intermediary metabolism	Nitrogen metabolism	nitrogen regulation protein NR(I)	Transcriptional regulatory protein ZraR	52 kDa		0.00015117			0.00031143	0.0004974	0.00015117	0.000404415	0.373799	0	1	2	false
PROKKA_00721	Central intermediary metabolism	Nitrogen metabolism	nitrite reductase [NAD(P)H], large subunit	Rubredoxin-NAD(+) reductase	40 kDa	0.00021265	0.00028373			0.0001299	0.0002334	0.00024819	0.00018165	1.36631	0	2	2	true
PROKKA_01010	Central intermediary metabolism	Nitrogen metabolism	nitrogen regulation protein NR(I)	Photosynthetic apparatus regulatory protein RegA	21 kDa	0.00087348	0.00038848	0.0032407	0.00092852		0.00047935	0.00150089	0.000703935	2.13214	0	3	2	true
PROKKA_02945	Central intermediary metabolism	Other	4-aminobutyrate transaminase	5-aminovalerate aminotransferase DavT	45 kDa	0.0014335	0.0013601		0.00060955	0.0015762	0.0010489	0.0013968	0.00107822	1.29547	0	2	3	true
PROKKA_04311	Central intermediary metabolism	Nitrogen metabolism	creatininase	Creatinine amidohydrolase	27 kDa	0.00032755	0.00058272		0.0003482	0.00030013	0.00023968	0.000455135	0.000296003	1.5376	0	2	3	true
PROKKA_04344	Central intermediary metabolism	Nitrogen fixation	nitrogen fixation protein NifM	Peptidyl-prolyl cis-trans isomerase C	10 kDa	0.0043674	0.0046618		0.0037141	0.0034681	0.004474	0.0045146	0.0038854	1.16194	0	2	3	true
PROKKA_03275	Central intermediary metabolism	Polyamine biosynthesis	arginine decarboxylase	Biosynthetic arginine decarboxylase	71 kDa	0.00070139	0.00051045	0.00094626	0.0003389	0.00035054	0.00027994	0.000719367	0.000323127	2.22627	1	3	3	true
PROKKA_04698	Central intermediary metabolism	Nitrogen fixation	nitrogen fixation protein NifM	Chaperone SurA precursor	49 kDa	0.0017303	0.0021062	0.0013515	0.00096808	0.00089007	0.00099955	0.00172933	0.000952567	1.81545	1	3	3	true
PROKKA_04061	Central intermediary metabolism	Other	4-aminobutyrate transaminase	Diaminobutyrate--2-oxoglutarate aminotransferase	52 kDa	0.0047269	0.0018687	0.0058458	0.0026055	0.0032617	0.0025621	0.00414713	0.00280977	1.47597	0	3	3	true
PROKKA_02946	Central intermediary metabolism	Other	succinate-semialdehyde dehydrogenase	Glutarate-semialdehyde dehydrogenase DavD	52 kDa	0.0019462	0.0015054	0.0012558	0.0019789	0.0022226	0.0016717	0.00156913	0.00195773	0.801505	0	3	3	true
PROKKA_02547	Central intermediary metabolism	Nitrogen fixation	nitrogen fixation protein NifM	Peptidyl-prolyl cis-trans isomerase D	69 kDa	0.0018876	0.0017949	0.001449	0.00089951	0.0014314	0.0008573	0.0017105	0.00106274	1.60952	1	3	3	true
PROKKA_02416	Central intermediary metabolism	Other	methionine adenosyltransferase	S-adenosylmethionine synthase	46 kDa	0.0011522	0.00068329	0.001425	0.00051036	0.0007625	0.0003513	0.00108683	0.000541387	2.00749	0	3	3	true
PROKKA_03995	DNA metabolism	DNA replication, recombination, and repair	ATP-dependent DNA helicase PcrA	ATP-dependent DNA helicase PcrA	122 kDa		6.5629e-05					6.5629e-05			0	1	off	false
PROKKA_02000	DNA metabolism	DNA replication, recombination, and repair	DNA ligase, NAD-dependent	DNA ligase	86 kDa		0.00013755					0.00013755			0	1	off	false
PROKKA_05404	DNA metabolism	DNA replication, recombination, and repair	repressor LexA	putative HTH-type transcriptional regulator	24 kDa		0.00033146					0.00033146			0	1	off	false
PROKKA_04579	DNA metabolism	Restriction/modification	type I restriction-modification system, M subunit	putative type I restriction enzymeP M protein	57 kDa	0.00015804	0.00021087					0.000184455		on T	0	2	off	false
PROKKA_00610	DNA metabolism	DNA replication, recombination, and repair	DNA gyrase, B subunit	DNA gyrase subunit B	90 kDa						7.3838e-05		7.3838e-05		0	off	1	false
PROKKA_02770	DNA metabolism	DNA replication, recombination, and repair	integration host factor, alpha subunit	Integration host factor subunit alpha	11 kDa				0.0012953				0.0012953		0	off	1	false
PROKKA_04883	DNA metabolism	DNA replication, recombination, and repair	amidohydrolase, PncC family	Nicotinamide-nucleotide amidohydrolase PncC	18 kDa				0.0005202				0.0005202		0	off	1	false
PROKKA_00535	DNA metabolism	DNA replication, recombination, and repair	DNA polymerase I	DNA polymerase I	102 kDa	0.00030539				7.9948e-05		0.00030539	7.9948e-05	3.81986	0	1	1	false
PROKKA_00259	DNA metabolism	DNA replication, recombination, and repair	-	Recombination-associated protein RdgC	34 kDa	0.00026547				0.00024324		0.00026547	0.00024324	1.09139	0	1	1	false
PROKKA_00722	DNA metabolism	DNA replication, recombination, and repair	integration host factor, alpha subunit	DNA-binding protein HU-beta	10 kDa				0.00094893	0.00081793			0.00088343	on UT	0	off	2	false
PROKKA_02589	DNA metabolism	DNA replication, recombination, and repair	exodeoxyribonuclease III	Exodeoxyribonuclease III	31 kDa					0.00018378	0.00022015		0.000201965	on UT	0	off	2	false
PROKKA_05553	DNA metabolism	DNA replication, recombination, and repair	mutator mutT protein	8-oxo-dGTP diphosphatase	34 kDa		0.00034518		0.00041251	0.00039507		0.00034518	0.00040379	0.85485	0	1	2	false
PROKKA_03333	DNA metabolism	DNA replication, recombination, and repair	exodeoxyribonuclease III (xth)	Exodeoxyribonuclease	30 kDa		0.00041848			0.00028738	0.00045899	0.00041848	0.000373185	1.12137	0	1	2	false
PROKKA_04952	DNA metabolism	Restriction/modification	DNA phosphorothioation system restriction enzyme	type I restriction enzyme EcoKI subunit R	182 kDa	9.9918e-05				9.1552e-05	7.3112e-05	9.9918e-05	8.2332e-05	1.2136	0	1	2	false
PROKKA_03903	DNA metabolism	DNA replication, recombination, and repair	DEXH box helicase, DNA ligase-associated	ATP-dependent RNA helicase DeaD	60 kDa	0.0013126	0.00071349			0.00017817	0.00021343	0.00101304	0.0001958	5.17388	1	2	2	true
PROKKA_00481	DNA metabolism	DNA replication, recombination, and repair	ATP-dependent DNA helicase RecQ	ATP-dependent RNA helicase RhlE	68 kDa	0.00051823	0.00028811			0.00043527	9.48e-05	0.00040317	0.000265035	1.5212	0	2	2	true
PROKKA_00612	DNA metabolism	DNA replication, recombination, and repair	DNA polymerase III, beta subunit	DNA polymerase III subunit beta	41 kDa	0.00066403	0.00019689			0.00087885	0.00056686	0.00043046	0.000722855	0.5955	0	2	2	true
PROKKA_02249	DNA metabolism	DNA replication, recombination, and repair	DNA topoisomerase I	DNA topoisomerase 1	97 kDa	0.00032568	8.2769e-05			0.00048314	0.00027235	0.000204225	0.000377745	0.540641	0	2	2	true
PROKKA_03707	DNA metabolism	Restriction/modification	type I restriction-modification system, M subunit	Type I restriction enzyme EcoKI M protein	57 kDa	0.00039205	0.00041848	0.0011636		0.00019159	0.0002295	0.000658043	0.000210545	3.12543	1	3	2	true
PROKKA_04737	DNA metabolism	DNA replication, recombination, and repair	cold shock domain protein CspD	Cold shock protein CapB	8 kDa				0.0043802	0.0017979	0.0021536		0.00277723	on UT	0	off	3	false
PROKKA_02778	DNA metabolism	DNA replication, recombination, and repair	cold shock domain protein CspD	Cold shock protein CapB	8 kDa		0.0020645		0.003084	0.00070887	0.0025474	0.0020645	0.00211342	0.976851	0	1	3	false
PROKKA_03520	DNA metabolism	DNA replication, recombination, and repair	single-stranded DNA-binding protein	Single-stranded DNA-binding protein	19 kDa		0.001479		0.0017675	0.0021764	0.001738	0.001479	0.00189397	0.780901	0	1	3	false
PROKKA_04489	DNA metabolism	DNA replication, recombination, and repair	DNA gyrase, A subunit	DNA gyrase subunit A	98 kDa	0.00050541	8.1739e-05		0.00014653	0.00089812	0.00043706	0.000293574	0.000493903	0.594397	0	2	3	true
PROKKA_02546	DNA metabolism	DNA replication, recombination, and repair	integration host factor, beta subunit	DNA-binding protein HU-beta	9 kDa	0.0013539	0.0020072		0.0023987	0.0013784	0.005944	0.00168055	0.00324037	0.51863	0	2	3	true
PROKKA_01628	DNA metabolism	DNA replication, recombination, and repair	integration host factor, beta subunit	DNA-binding protein HRm	10 kDa	0.0034939	0.0038848	0.009722	0.0064997	0.0053356	0.013422	0.00570023	0.0084191	0.67706	0	3	3	true
PROKKA_04882	DNA metabolism	DNA replication, recombination, and repair	protein RecA	recombinase A	38 kDa	0.0025385	0.00092375	0.0025686	0.0013493	0.0019736	0.0017731	0.00201028	0.00169867	1.18345	0	3	3	true
PROKKA_03664	Energy metabolism	Other	4-hydroxybenzoyl-CoA reductase, beta subunit	4-hydroxybenzoyl-CoA reductase subunit beta	36 kDa	0.00024691						0.00024691			0	1	off	false
PROKKA_03016	Energy metabolism	Amino acids and amines	formiminoglutamate deiminase	8-oxoguanine deaminase	50 kDa	0.00017893						0.00017893			0	1	off	false
PROKKA_01063	Energy metabolism	Sugars	sugar isomerase, KpsF/GutQ family	Arabinose 5-phosphate isomerase KdsD	34 kDa	0.00025072						0.00025072			0	1	off	false
PROKKA_00360	Energy metabolism	Electron transport	cytochrome c nitrite reductase, accessory protein NrfF	Cytochrome c-type biogenesis protein CcmH precursor	18 kDa		0.00046024					0.00046024			0	1	off	false
PROKKA_01701	Energy metabolism	Sugars	nucleotide sugar dehydrogenase	GDP-mannose 6-dehydrogenase	47 kDa	0.0002782						0.0002782			0	1	off	false
PROKKA_04645	Energy metabolism	Glycolysis/gluconeogenesis	glucokinase	Glucokinase	34 kDa		0.00022722					0.00022722			0	1	off	false
PROKKA_00309	Energy metabolism	Glycolysis/gluconeogenesis	glycerol-3-phosphate dehydrogenase (NAD(+))	Glycerol-3-phosphate dehydrogenase [NAD(P)+]	36 kDa	0.00035733						0.00035733			0	1	off	false
PROKKA_01357	Energy metabolism	Other	4-hydroxybenzoyl-CoA reductase, alpha subunit	Isoquinoline 1-oxidoreductase subunit beta	80 kDa		9.699e-05					9.699e-05			0	1	off	false
PROKKA_02631	Energy metabolism	Electron transport	NADH-quinone oxidoreductase, chain I	NADH-quinone oxidoreductase subunit I	20 kDa		0.00079404					0.00079404			0	1	off	false
PROKKA_04825	Energy metabolism	Electron transport	mycofactocin system FadH/OYE family oxidoreductase 2	NADPH dehydrogenase	41 kDa		0.00019635					0.00019635			0	1	off	false
PROKKA_03492	Energy metabolism	Other	phosphoenolpyruvate-protein phosphotransferase	Phosphoenolpyruvate-protein phosphotransferase	83 kDa		9.5201e-05					9.5201e-05			0	1	off	false
PROKKA_02365	Energy metabolism	Other	phenylacetate degradation probable enoyl-CoA hydratase PaaB	putative enoyl-CoA hydratase echA8	41 kDa	0.00032932						0.00032932			0	1	off	false
PROKKA_00359	Energy metabolism	Electron transport	cytochrome c-type biogenesis protein CcmI	Formate-dependent nitrite reductase complex subunit NrfG	43 kDa	0.0003077	0.00054741					0.000427555		on T	0	2	off	false
PROKKA_01246	Energy metabolism	Other	heme/flavin dehydrogenase, mycofactocin system	L-lactate dehydrogenase [cytochrome]	41 kDa	0.00032407	0.00028826					0.000306165		on T	0	2	off	false
PROKKA_00959	Energy metabolism	Electron transport	pyridine nucleotide-disulfide oxidoreductase family protein	NADH dehydrogenase	47 kDa	0.00028206	0.00025089					0.000266475		on T	0	2	off	false
PROKKA_02634	Energy metabolism	Electron transport	NADH oxidoreductase (quinone), F subunit	NADH-quinone oxidoreductase subunit F	49 kDa	0.00063041	0.00032043					0.00047542		on T	0	2	off	false
PROKKA_00423	Energy metabolism	Amino acids and amines	-	3-mercaptopyruvate sulfurtransferase	31 kDa						0.00031394		0.00031394		0	off	1	false
PROKKA_05763	Energy metabolism	Other	3-oxoadipate enol-lactonase	Arylesterase	30 kDa				0.00031747				0.00031747		0	off	1	false
PROKKA_05222	Energy metabolism	Other	phenylacetate degradation probable enoyl-CoA hydratase PaaB	Carnitinyl-CoA dehydratase	40 kDa				0.0010588				0.0010588		0	off	1	false
PROKKA_02412	Energy metabolism	Electron transport	-	Cytochrome c'	17 kDa						0.00039626		0.00039626		0	off	1	false
PROKKA_03121	Energy metabolism	Amino acids and amines	-	Glutamate-ammonia-ligase adenylyltransferase	110 kDa						6.0715e-05		6.0715e-05		0	off	1	false
PROKKA_03385	Energy metabolism	Amino acids and amines	maleylacetoacetate isomerase	Glutathione S-transferase	24 kDa					0.0010196			0.0010196		0	off	1	false
PROKKA_00504	Energy metabolism	Electron transport	NAD(P)(+) transhydrogenase (AB-specific), alpha subunit	NAD(P) transhydrogenase subunit alpha part 1	39 kDa					0.00013303			0.00013303		0	off	1	false
PROKKA_02637	Energy metabolism	Electron transport	NADH-quinone oxidoreductase, B subunit	NADH-quinone oxidoreductase subunit B	25 kDa				0.00057825				0.00057825		0	off	1	false
PROKKA_02062	Energy metabolism	Other	beta-phosphoglucomutase family hydrolase	Phosphorylated carbohydrates phosphatase	25 kDa						0.0005214		0.0005214		0	off	1	false
PROKKA_03987	Energy metabolism	Other	phenylacetate degradation probable enoyl-CoA hydratase PaaB	putative enoyl-CoA hydratase echA8	30 kDa				0.00031982				0.00031982		0	off	1	false
PROKKA_03139	Energy metabolism	Sugars	UDP-glucose 4-epimerase GalE	UDP-glucose 4-epimerase	33 kDa					0.00016111			0.00016111		0	off	1	false
PROKKA_03975	Energy metabolism	Biosynthesis and degradation of polysaccharides	1,4-alpha-glucan branching enzyme	1,4-alpha-glucan branching enzyme GlgB	84 kDa	0.0001086				9.9508e-05		0.0001086	9.9508e-05	1.09137	0	1	1	false
PROKKA_03973	Energy metabolism	Biosynthesis and degradation of polysaccharides	trehalose synthase	Alpha-1,4-glucan:maltose-1-phosphate maltosyltransferase 2	75 kDa	0.00018406				0.00011243		0.00018406	0.00011243	1.63711	0	1	1	false
PROKKA_01527	Energy metabolism	Electron transport	cytochrome o ubiquinol oxidase, subunit I	Cytochrome bo(3) ubiquinol oxidase subunit 1	75 kDa		0.00010753			0.00022152		0.00010753	0.00022152	0.485419	0	1	1	false
PROKKA_01971	Energy metabolism	Electron transport	cytochrome c oxidase, cbb3-type, subunit II	Cytochrome C oxidase, mono-heme subunit/FixO	23 kDa		0.0010731		0.00042749			0.0010731	0.00042749	2.51023	0	1	1	false
PROKKA_05166	Energy metabolism	Electron transport	glutathione-disulfide reductase	Glutathione amide reductase	49 kDa		0.00015986			0.00010978		0.00015986	0.00010978	1.45619	0	1	1	false
PROKKA_05262	Energy metabolism	Other	phenylacetate degradation probable enoyl-CoA hydratase PaaB	Methionyl-tRNA formyltransferase	64 kDa	0.00021191					0.00010337	0.00021191	0.00010337	2.05001	0	1	1	false
PROKKA_01785	Energy metabolism	Amino acids and amines	phenylalanine-4-hydroxylase	Phenylalanine-4-hydroxylase	30 kDa		0.00054949			0.00018867		0.00054949	0.00018867	2.91244	0	1	1	false
PROKKA_04187	Energy metabolism	Aerobic	pyruvate oxidase	Pyruvate dehydrogenase [ubiquinone]	62 kDa	0.00042456				8.6448e-05		0.00042456	8.6448e-05	4.91116	0	1	1	false
PROKKA_05515	Energy metabolism	Amino acids and amines	squalene-associated FAD-dependent desaturase	Tryptophan 2-monooxygenase	63 kDa	0.00014327				0.0003063		0.00014327	0.0003063	0.467744	0	1	1	false
PROKKA_00232	Energy metabolism	Biosynthesis and degradation of polysaccharides	4-alpha-glucanotransferase	4-alpha-glucanotransferase	76 kDa	0.0002341	0.00010412			0.000143		0.00016911	0.000143	1.18259	0	2	1	false
PROKKA_01306	Energy metabolism	Electron transport	mycofactocin system FadH/OYE family oxidoreductase 2	NADH oxidase	42 kDa	0.00085284	0.00047413		0.00022665			0.000663485	0.00022665	2.92735	0	2	1	false
PROKKA_00628	Energy metabolism	ATP-proton motive force interconversion	ATP synthase F1, delta subunit	ATP synthase subunit delta	19 kDa	0.0015973	0.0028416	0.0033863	0.0019405			0.0026084	0.0019405	1.34419	0	3	1	false
PROKKA_00268	Energy metabolism	Amino acids and amines	maleylacetoacetate isomerase	Glutathione S-transferase GstB	23 kDa					0.00048411	0.00043492		0.000459515	on UT	0	off	2	false
PROKKA_01079	Energy metabolism	TCA cycle	malate dehydrogenase (acceptor)	Malate:quinone oxidoreductase	56 kDa					0.0011145	0.00058047		0.000847485	on UT	0	off	2	false
PROKKA_02581	Energy metabolism	ATP-proton motive force interconversion	methylmalonyl-CoA decarboxylase alpha subunit	Methylmalonyl-CoA carboxyltransferase 12S subunit	57 kDa					0.00018585	0.00011131		0.00014858	on UT	0	off	2	false
PROKKA_04798	Energy metabolism	Glycolysis/gluconeogenesis	-	Phosphoenolpyruvate carboxylase	98 kDa					0.00025346	0.00016867		0.000211065	on UT	0	off	2	false
PROKKA_01666	Energy metabolism	Amino acids and amines	fumarylacetoacetase	Ureidoglycolate lyase	47 kDa					0.00075359	0.00027776		0.000515675	on UT	0	off	2	false
PROKKA_00363	Energy metabolism	Electron transport	-	Cytochrome c-type biogenesis protein CcmE	16 kDa		0.00071307		0.00056811		0.00039105	0.00071307	0.00047958	1.48686	0	1	2	false
PROKKA_05488	Energy metabolism	TCA cycle	malate synthase G	Malate synthase G	79 kDa	0.00022409				0.00051332	0.00020496	0.00022409	0.00035914	0.623963	0	1	2	false
PROKKA_01884	Energy metabolism	Amino acids and amines	succinylarginine dihydrolase	N-succinylarginine dihydrolase	49 kDa	0.00036265				0.00055381	0.00039803	0.00036265	0.00047592	0.761998	0	1	2	false
PROKKA_04646	Energy metabolism	Entner-Doudoroff	phosphogluconate dehydratase	Phosphogluconate dehydratase	65 kDa	0.00026721				0.00093856	0.00058658	0.00026721	0.00076257	0.350407	0	1	2	false
PROKKA_02072	Energy metabolism	Other	phenylacetate degradation probable enoyl-CoA hydratase PaaB	putative enoyl-CoA hydratase	25 kDa	0.00035319			0.00093862	0.00043149		0.00035319	0.000685055	0.515564	0	1	2	false
PROKKA_01838	Energy metabolism	Fermentation	zinc-binding alcohol dehydrogenase family protein	Zinc-type alcohol dehydrogenase-like protein	36 kDa		0.00021441			0.00014724	0.00026457	0.00021441	0.000205905	1.04131	0	1	2	false
PROKKA_00332	Energy metabolism	TCA cycle	oxoglutarate dehydrogenase (succinyl-transferring), E1 component	2-oxoglutarate dehydrogenase E1 component	106 kDa	0.0010768	0.00019156			0.0011313	0.00047274	0.00063418	0.00080202	0.790728	0	2	2	true
PROKKA_02263	Energy metabolism	TCA cycle	aconitate hydratase 1	Aconitate hydratase 1	99 kDa	0.00093423	0.000277			0.0003261	0.00032552	0.000605615	0.00032581	1.8588	0	2	2	true
PROKKA_03203	Energy metabolism	Electron transport	azurin	Azurin precursor	16 kDa	0.0038421	0.0051264		0.0058346		0.004217	0.00448425	0.0050258	0.892246	0	2	2	true
PROKKA_03112	Energy metabolism	Amino acids and amines	delta-1-pyrroline-5-carboxylate dehydrogenase	Bifunctional protein PutA	142 kDa	0.00049344	5.4865e-05			0.00039561	0.00049646	0.000274153	0.000446035	0.614643	0	2	2	true
PROKKA_00337	Energy metabolism	TCA cycle	citrate (Si)-synthase	Citrate synthase	48 kDa	0.0014202	0.00025265			0.00098317	0.00048494	0.000836425	0.000734055	1.13946	0	2	2	true
PROKKA_02889	Energy metabolism	Amino acids and amines	pyridoxal phosphate-dependent enzymes, D-cysteine desulfhydrase family	D-cysteine desulfhydrase	35 kDa	0.00036813	0.0002183		0.00026088	0.00044974		0.000293215	0.00035531	0.825237	0	2	2	true
PROKKA_00562	Energy metabolism	Other	pyranose oxidase	Gluconate 2-dehydrogenase flavoprotein precursor	65 kDa	0.00041027	0.00030411		0.00014537	0.00020884		0.00035719	0.000177105	2.01683	1	2	2	true
PROKKA_05652	Energy metabolism	Pentose phosphate pathway	glucose-6-phosphate dehydrogenase	Glucose-6-phosphate 1-dehydrogenase	55 kDa	0.00066585	0.00044421			0.00096599	0.00073082	0.00055503	0.000848405	0.654204	1	2	2	true
PROKKA_02238	Energy metabolism	Glycolysis/gluconeogenesis	glyceraldehyde-3-phosphate dehydrogenase, type I	Glyceraldehyde-3-phosphate dehydrogenase	53 kDa	0.00050041		0.0012377		0.00025473	0.00018308	0.000869055	0.000218905	3.97001	1	2	2	true
PROKKA_02636	Energy metabolism	Electron transport	NADH dehydrogenase (quinone), D subunit	NADH-quinone oxidoreductase subunit C/D	68 kDa	0.00082054	0.00036494			0.00037592	0.00035023	0.00059274	0.000363075	1.63256	0	2	2	true
PROKKA_03487	Energy metabolism	Pentose phosphate pathway	ribose 5-phosphate isomerase A	Ribose-5-phosphate isomerase A	23 kDa	0.00072855	0.00097207		0.00038723		0.00066636	0.00085031	0.000526795	1.61412	1	2	2	true
PROKKA_04705	Energy metabolism	Pentose phosphate pathway	ribulose-phosphate 3-epimerase	Ribulose-phosphate 3-epimerase	24 kDa	0.00090662	0.00080645		0.00077101		0.00026536	0.000856535	0.000518185	1.65295	1	2	2	true
PROKKA_03540	Energy metabolism	Electron transport	thioredoxin	Thioredoxin-1	32 kDa	0.00056023	0.0011212		0.0008933		0.0010248	0.000840715	0.00095905	0.876612	0	2	2	true
PROKKA_04047	Energy metabolism	Other	glycerol kinase	Glycerol kinase	56 kDa	0.00040536	0.00021634	0.0012031	0.00017236	0.00014857		0.000608267	0.000160465	3.79065	0	3	2	true
PROKKA_00823	Energy metabolism	Sugars	phosphoglucomutase, alpha-D-glucose phosphate-specific	Phosphoglucomutase	59 kDa	0.00051977	0.00019815	0.0011019		0.00036286	0.00027166	0.000606607	0.00031726	1.91202	0	3	2	true
PROKKA_03482	Energy metabolism	Other	glycolate oxidase, subunit GlcD	putative FAD-linked oxidoreductase	52 kDa	0.00043026	0.00022963	0.001277		0.00068334	0.00056669	0.00064563	0.000625015	1.03298	0	3	2	true
PROKKA_02510	Energy metabolism	Pyruvate dehydrogenase	pyruvate dehydrogenase (acetyl-transferring) E1 component, alpha subunit	2-oxoisovalerate dehydrogenase subunit alpha	45 kDa				0.00042021	0.0005433	0.00014462		0.000369377	on UT	0	off	3	false
PROKKA_01175	Energy metabolism	Amino acids and amines	3-hydroxyisobutyrate dehydrogenase	3-hydroxyisobutyrate dehydrogenase	30 kDa				0.0023497	0.0033756	0.003437		0.0030541	on UT	0	off	3	false
PROKKA_01050	Energy metabolism	TCA cycle	fumarate hydratase, class II	Fumarate hydratase class II	49 kDa				0.00056563	0.00054172	0.00051912		0.000542157	on UT	0	off	3	false
PROKKA_02580	Energy metabolism	Other	phenylacetate degradation probable enoyl-CoA hydratase PaaB	Hydroxycinnamoyl-CoA hydratase-lyase	30 kDa				0.00080553	0.0013887	0.00055447		0.000916233	on UT	0	off	3	false
PROKKA_03027	Energy metabolism	Amino acids and amines	imidazolonepropionase	Imidazolonepropionase	43 kDa				0.00021534	0.00018562	0.00014823		0.000183063	on UT	0	off	3	false
PROKKA_02508	Energy metabolism	TCA cycle	dihydrolipoyllysine-residue succinyltransferase, E2 component of oxoglutarate dehydrogenase (succinyl-transferring) complex	Lipoamide acyltransferase component of branched-chain alpha-keto acid dehydrogenase complex	45 kDa				0.0007179	0.00082506	0.00035297		0.000631977	on UT	0	off	3	false
PROKKA_02048	Energy metabolism	Other	methylisocitrate lyase	Methylisocitrate lyase	32 kDa				0.0014537	0.0042604	0.0039026		0.00320557	on UT	0	off	3	false
PROKKA_04188	Energy metabolism	Electron transport	-	NADPH azoreductase	20 kDa				0.00093354	0.00080467	0.00048194		0.00074005	on UT	0	off	3	false
PROKKA_05277	Energy metabolism	Other	methylisocitrate lyase	Oxaloacetate decarboxylase	31 kDa				0.0002988	0.0006868	0.00041135		0.00046565	on UT	0	off	3	false
PROKKA_01886	Energy metabolism	Amino acids and amines	succinylglutamate desuccinylase	Succinylglutamate desuccinylase	37 kDa				0.00038781	0.00037142	0.00035593		0.00037172	on UT	0	off	3	false
PROKKA_03926	Energy metabolism	Sugars	5-dehydro-2-deoxygluconokinase	2-dehydro-3-deoxygluconokinase	33 kDa		0.00023085		0.00082766	0.0007134	0.00047476	0.00023085	0.00067194	0.343557	0	1	3	false
PROKKA_05182	Energy metabolism	Amino acids and amines	4-hydroxyphenylpyruvate dioxygenase	4-hydroxyphenylpyruvate dioxygenase	40 kDa		0.00020184		0.00084423	0.0020791	0.0012452	0.00020184	0.00138951	0.14526	0	1	3	false
PROKKA_04634	Energy metabolism	Other	hydrolyase, tartrate alpha subunit/fumarate domain protein, Fe-S type	Fumarate hydratase class I, aerobic	55 kDa		0.00014252		0.00025548	0.00034255	0.00041033	0.00014252	0.00033612	0.424015	0	1	3	false
PROKKA_01176	Energy metabolism	Amino acids and amines	methylmalonate-semialdehyde dehydrogenase (acylating)	Methylmalonate-semialdehyde dehydrogenase [acylating]	54 kDa		0.00021463		0.0012825	0.0034391	0.0024717	0.00021463	0.00239777	0.0895125	0	1	3	false
PROKKA_02035	Energy metabolism	Glycolysis/gluconeogenesis	phosphoenolpyruvate synthase	Phosphoenolpyruvate synthase	86 kDa	0.00056483			0.00016375	0.00050186	0.00086417	0.00056483	0.000509927	1.10767	0	1	3	false
PROKKA_03584	Energy metabolism	Other	phenylacetic acid degradation protein paaN	putative enoyl-CoA hydratase 1	17 kDa		0.00071779		0.0037172	0.00082154	0.00059046	0.00071779	0.00170973	0.419826	0	1	3	false
PROKKA_05220	Energy metabolism	Other	phenylacetate degradation probable enoyl-CoA hydratase PaaB	putative enoyl-CoA hydratase echA8	28 kDa		0.00070289		0.002352	0.0023169	0.0013877	0.00070289	0.00201887	0.348161	0	1	3	false
PROKKA_03418	Energy metabolism	Electron transport	thioredoxin	Thioredoxin-1	12 kDa		0.0019887		0.003565	0.0027314	0.0057258	0.0019887	0.0040074	0.496257	0	1	3	false
PROKKA_01021	Energy metabolism	Electron transport	ubiquinol-cytochrome c reductase, iron-sulfur subunit	Ubiquinol-cytochrome c reductase iron-sulfur subunit	21 kDa		0.00055018		0.00043834	0.00025188	0.00030172	0.00055018	0.000330647	1.66395	0	1	3	false
PROKKA_03019	Energy metabolism	Amino acids and amines	urocanate hydratase	Urocanate hydratase	61 kDa		0.00019494		0.00046593	0.00071397	0.00064144	0.00019494	0.000607113	0.321093	0	1	3	false
PROKKA_02995	Energy metabolism	Glycolysis/gluconeogenesis	phosphoglycerate mutase (2,3-diphosphoglycerate-independent)	2,3-bisphosphoglycerate-independent phosphoglycerate mutase	55 kDa	0.00047972	0.0003556		0.00016999	0.00053724	0.00029252	0.00041766	0.00033325	1.25329	0	2	3	true
PROKKA_05653	Energy metabolism	Pentose phosphate pathway	6-phosphogluconolactonase	6-phosphogluconolactonase	25 kDa	0.0018852	0.0019817		0.003097	0.0040828	0.003135	0.00193345	0.00343827	0.562333	1	2	3	true
PROKKA_00154	Energy metabolism	TCA cycle	aconitate hydratase 2	Aconitate hydratase 2	95 kDa	0.0015336	0.00086808		0.00049401	0.0024697	0.0019723	0.00120084	0.00164534	0.729845	0	2	3	true
PROKKA_05600	Energy metabolism	Amino acids and amines	glycine cleavage system T protein	Aminomethyltransferase	40 kDa	0.0017376	0.001449		0.00057722	0.0011941	0.00063572	0.0015933	0.000802347	1.9858	0	2	3	true
PROKKA_01023	Energy metabolism	Electron transport	-	Cytochrome b/c1	29 kDa	0.00094093	0.00069747		0.00050011	0.00028738	0.0002295	0.0008192	0.000338997	2.41654	0	2	3	true
PROKKA_01528	Energy metabolism	Electron transport	ubiquinol oxidase, subunit II	Cytochrome bo(3) ubiquinol oxidase subunit 2 precursor	35 kDa	0.00077859	0.00069256		0.00068972	0.001189	0.00047476	0.000735575	0.000784493	0.937643	0	2	3	true
PROKKA_05391	Energy metabolism	Amino acids and amines	maleylacetoacetate isomerase	Disulfide-bond oxidoreductase YghU	30 kDa	0.00029539	0.00065689		0.00062802	0.0011729	0.00097265	0.00047614	0.000924523	0.515011	0	2	3	true
PROKKA_02092	Energy metabolism	Electron transport	-	Electron transfer flavoprotein subunit alpha	31 kDa	0.0015773	0.0026892		0.0034932	0.00273	0.0035587	0.00213325	0.00326063	0.654244	0	2	3	true
PROKKA_03013	Energy metabolism	Sugars	-	Fructose-1,6-bisphosphatase class 1	37 kDa	0.00084618	0.00086021		0.000514	0.00022152	0.00035381	0.000853195	0.00036311	2.34969	1	2	3	true
PROKKA_00561	Energy metabolism	Electron transport	cytochrome c oxidase, cbb3-type, subunit III	Gluconate 2-dehydrogenase cytochrome c subunit precursor	46 kDa	0.00018804	0.00033453		0.00019989	0.0001723	0.00013759	0.000261285	0.000169927	1.53763	0	2	3	true
PROKKA_04938	Energy metabolism	Electron transport	thioredoxin-disulfide reductase	Glucosaminate ammonia-lyase	34 kDa	0.0022847	0.0020322		0.0013493	0.0015507	0.001486	0.00215845	0.001462	1.47637	1	2	3	true
PROKKA_04273	Energy metabolism	Pentose phosphate pathway	glucose-6-phosphate dehydrogenase	Glucose-6-phosphate 1-dehydrogenase	56 kDa	0.00064089	0.00057008		0.00034064	0.00024468	0.00011724	0.000605485	0.000234187	2.58548	1	2	3	true
PROKKA_03748	Energy metabolism	Glycolysis/gluconeogenesis	-	Glucose-6-phosphate isomerase	61 kDa	0.0009531	0.00058693		0.00046761	0.00071655	0.00075104	0.000770015	0.000645067	1.1937	0	2	3	true
PROKKA_01277	Energy metabolism	Amino acids and amines	maleylacetoacetate isomerase	Glutathione S-transferase GstB	23 kDa	0.00058582	0.00034739		0.0010379	0.00059641	0.00057154	0.000466605	0.000735283	0.634592	0	2	3	true
PROKKA_04647	Energy metabolism	Glycolysis/gluconeogenesis	glyceraldehyde-3-phosphate dehydrogenase, type I	Glyceraldehyde-3-phosphate dehydrogenase 1	36 kDa	0.004513	0.0029294		0.004927	0.0062585	0.0038377	0.0037212	0.00500773	0.743091	0	2	3	true
PROKKA_05696	Energy metabolism	Other	-	Glycerophosphoryl diester phosphodiesterase	41 kDa	0.00086649	0.00086709		0.0010362	0.00052929	0.00047552	0.00086679	0.000680337	1.27406	0	2	3	true
PROKKA_05603	Energy metabolism	Amino acids and amines	glycine cleavage system H protein	Glycine cleavage system H protein	14 kDa		0.00085344	0.0047462	0.00067994	0.00058608	0.00046803	0.00279982	0.000578017	4.84384	0	2	3	true
PROKKA_05602	Energy metabolism	Amino acids and amines	glycine dehydrogenase	Glycine dehydrogenase (decarboxylating)	102 kDa	0.00094557	0.00034408		0.00013707	0.00076138	0.00050319	0.000644825	0.000467213	1.38015	0	2	3	true
PROKKA_00229	Energy metabolism	Biosynthesis and degradation of polysaccharides	glycogen debranching enzyme GlgX	Glycogen debranching enzyme	82 kDa	0.00050841	0.00025124		0.0001201	0.00055211	0.00020667	0.000379825	0.00029296	1.29651	0	2	3	true
PROKKA_03025	Energy metabolism	Amino acids and amines	histidine ammonia-lyase	Histidine ammonia-lyase	54 kDa	0.00031856	0.0003542		0.0004233	0.00077837	0.00081584	0.00033638	0.000672503	0.500191	0	2	3	true
PROKKA_02650	Energy metabolism	TCA cycle	isocitrate dehydrogenase, NADP-dependent	Isocitrate dehydrogenase [NADP]	45 kDa	0.00048584	0.00017286		0.00030988	0.00071227	0.0009243	0.00032935	0.000648817	0.507616	0	2	3	true
PROKKA_01018	Energy metabolism	Other	voltage-dependent potassium channel beta subunit	L-glyceraldehyde 3-phosphate reductase	39 kDa	0.00058695	0.00083535		0.00087351	0.00086048	0.00068716	0.00071115	0.00080705	0.881172	0	2	3	true
PROKKA_02886	Energy metabolism	Other	voltage-dependent potassium channel beta subunit	L-glyceraldehyde 3-phosphate reductase	38 kDa	0.00094183	0.00094249		0.0012515	0.0005034	0.00068916	0.00094216	0.000814687	1.15647	0	2	3	true
PROKKA_04460	Energy metabolism	TCA cycle	malate dehydrogenase (acceptor)	Malate:quinone oxidoreductase	60 kDa	0.0011118	0.0011208		0.00094547	0.00086022	0.00054233	0.0011163	0.000782673	1.42627	1	2	3	true
PROKKA_00052	Energy metabolism	Sugars	-	Periplasmic beta-glucosidase precursor	83 kDa	0.0004791	0.00033146		0.00016976	0.00022762	7.7903e-05	0.00040528	0.000158428	2.55814	1	2	3	true
PROKKA_00333	Energy metabolism	Aerobic	succinate dehydrogenase and fumarate reductase iron-sulfur protein	Succinate dehydrogenase iron-sulfur subunit	26 kDa	0.0027772	0.0024703		0.0011071	0.0021206	0.0026672	0.00262375	0.00196497	1.33526	0	2	3	true
PROKKA_02418	Energy metabolism	Pentose phosphate pathway	transketolase	Transketolase 1	72 kDa	0.0018934	0.00097792		0.00019478	0.0022759	0.001162	0.00143566	0.00121089	1.18562	0	2	3	true
PROKKA_03736	Energy metabolism	Glycolysis/gluconeogenesis	triose-phosphate isomerase	Triosephosphate isomerase	26 kDa	0.0012946	0.0012955		0.0012041	0.001285	0.0010657	0.00129505	0.00118493	1.09293	0	2	3	true
PROKKA_02836	Energy metabolism	Sugars	UDP-glucose 4-epimerase GalE	UDP-glucose 4-epimerase	33 kDa	0.00052409	0.00046618		0.0016713	0.0017608	0.0019174	0.000495135	0.00178317	0.277672	1	2	3	true
PROKKA_04775	Energy metabolism	Other	2,3,4,5-tetrahydropyridine-2,6-dicarboxylate N-succinyltransferase	2,3,4,5-tetrahydropyridine-2,6-dicarboxylate N-succinyltransferase	36 kDa	0.0025976	0.0015754	0.0017522	0.0013806	0.0020195	0.0017279	0.00197507	0.00170933	1.15546	0	3	3	true
PROKKA_04274	Energy metabolism	Pentose phosphate pathway	6-phosphogluconate dehydrogenase (decarboxylating)	6-phosphogluconate dehydrogenase, NADP(+)-dependent, decarboxylating	35 kDa	0.0024842	0.0022097	0.0018433	0.0013204	0.0026556	0.0018177	0.00217907	0.00193123	1.12833	0	3	3	true
PROKKA_00485	Energy metabolism	Amino acids and amines	adenosylhomocysteinase	Adenosylhomocysteinase	51 kDa	0.00060622	0.0004622	0.0012852	0.0004603	0.0017457	0.0019644	0.00078454	0.00139013	0.564363	0	3	3	true
PROKKA_02382	Energy metabolism	Sugars	lactaldehyde reductase	Alcohol dehydrogenase 2	40 kDa	0.0056353	0.0030265	0.0055227	0.0019215	0.002598	0.0021784	0.00472817	0.00223263	2.11775	1	3	3	true
PROKKA_05609	Energy metabolism	Amino acids and amines	arginine deiminase	Arginine deiminase	46 kDa	0.0062188	0.0043216	0.011536	0.002479	0.00368	0.0026307	0.0073588	0.0029299	2.51162	1	3	3	true
PROKKA_00695	Energy metabolism	Amino acids and amines	aspartate ammonia-lyase	Aspartate ammonia-lyase	51 kDa	0.001371	0.00099087	0.0019075	0.00045545	0.00062812	0.0005016	0.00142312	0.00052839	2.69332	1	3	3	true
PROKKA_00632	Energy metabolism	ATP-proton motive force interconversion	ATP synthase F1, epsilon subunit	ATP synthase epsilon chain	15 kDa	0.0035319	0.0044506	0.01092	0.002503	0.0057532	0.0051687	0.00630083	0.00447497	1.40802	0	3	3	true
PROKKA_00630	Energy metabolism	ATP-proton motive force interconversion	ATP synthase F1, gamma subunit	ATP synthase gamma chain	31 kDa	0.0015622	0.0012632	0.0021076	0.0016606	0.0019085	0.0013509	0.00164433	0.00164	1.00264	0	3	3	true
PROKKA_00629	Energy metabolism	ATP-proton motive force interconversion	ATP synthase F1, alpha subunit	ATP synthase subunit alpha	55 kDa	0.0069538	0.0037253	0.0093816	0.002604	0.0071439	0.0056664	0.0066869	0.0051381	1.30143	0	3	3	true
PROKKA_00627	Energy metabolism	ATP-proton motive force interconversion	ATP synthase F0, B subunit	ATP synthase subunit b	17 kDa	0.0088523	0.0067162	0.013524	0.0044283	0.0066798	0.0045723	0.0096975	0.0052268	1.85534	1	3	3	true
PROKKA_00631	Energy metabolism	ATP-proton motive force interconversion	ATP synthase F1, beta subunit	ATP synthase subunit beta	49 kDa	0.0078041	0.0061529	0.0059224	0.0037709	0.0066631	0.0057753	0.00662647	0.0054031	1.22642	0	3	3	true
PROKKA_05607	Energy metabolism	Amino acids and amines	carbamate kinase	Carbamate kinase 2	33 kDa	0.0053893	0.0032738	0.0039014	0.0022357	0.0022482	0.0025007	0.00418817	0.0023282	1.79889	1	3	3	true
PROKKA_00330	Energy metabolism	Pyruvate dehydrogenase	dihydrolipoyl dehydrogenase	Dihydrolipoamide dehydrogenase	50 kDa	0.0042486	0.0030989	0.0069356	0.0021678	0.0035814	0.0043523	0.00476103	0.00336717	1.41396	0	3	3	true
PROKKA_03119	Energy metabolism	Pyruvate dehydrogenase	dihydrolipoyllysine-residue acetyltransferase	Dihydrolipoyllysine-residue acetyltransferase component of pyruvate dehydrogenase complex	56 kDa	0.00378	0.0014504	0.0049497	0.001103	0.0019468	0.0022236	0.00339337	0.0017578	1.93046	0	3	3	true
PROKKA_00331	Energy metabolism	TCA cycle	dihydrolipoyllysine-residue succinyltransferase, E2 component of oxoglutarate dehydrogenase (succinyl-transferring) complex	Dihydrolipoyllysine-residue succinyltransferase component of 2-oxoglutarate dehydrogenase complex	42 kDa	0.0032932	0.0026631	0.0022215	0.0014852	0.0018288	0.0015335	0.00272593	0.00161583	1.68701	1	3	3	true
PROKKA_02093	Energy metabolism	Electron transport	electron transfer flavoprotein, mycofactocin-associated	Electron transfer flavoprotein subunit beta	26 kDa	0.0052198	0.0039176	0.0084726	0.0058956	0.0060781	0.0068033	0.00587	0.006259	0.937849	0	3	3	true
PROKKA_04749	Energy metabolism	Glycolysis/gluconeogenesis	phosphopyruvate hydratase	Enolase	46 kDa	0.0037871	0.0029476	0.0035126	0.0030193	0.0051472	0.0030482	0.00341577	0.00373823	0.913738	0	3	3	true
PROKKA_02423	Energy metabolism	Sugars	fructose-bisphosphate aldolase, class II, Calvin cycle subtype	Fructose-bisphosphate aldolase	38 kDa	0.0026389	0.0019391	0.0042568	0.0010977	0.0030838	0.0019309	0.00294493	0.00203747	1.44539	0	3	3	true
PROKKA_01237	Energy metabolism	TCA cycle	fumarate hydratase, class II	Fumarate hydratase class II	49 kDa	0.0011479	0.00078541	0.0013104	0.00028158	0.0011866	0.00045226	0.00108124	0.000640147	1.68905	0	3	3	true
PROKKA_02789	Energy metabolism	Amino acids and amines	L-asparaginase, type II	Glutaminase-asparaginase precursor	39 kDa	0.004488	0.0039921	0.0041627	0.0081105	0.0067167	0.0060753	0.00421427	0.0069675	0.604846	1	3	3	true
PROKKA_02649	Energy metabolism	TCA cycle	isocitrate dehydrogenase, NADP-dependent	Isocitrate dehydrogenase [NADP]	80 kDa	0.0021925	0.00097513	0.00081345	0.00081575	0.0025112	0.0022861	0.00132703	0.00187102	0.709254	0	3	3	true
PROKKA_02639	Energy metabolism	TCA cycle	isocitrate lyase	Isocitrate lyase	49 kDa	0.00046051	0.00024577	0.0013668	0.00019581	0.00078764	0.00060653	0.000691027	0.000529993	1.30384	0	3	3	true
PROKKA_05189	Energy metabolism	Other	voltage-dependent potassium channel beta subunit	L-glyceraldehyde 3-phosphate reductase	37 kDa	0.00096706	0.00086021	0.0017939	0.00077101	0.00066457	0.00061916	0.00120706	0.000684913	1.76235	1	3	3	true
PROKKA_02633	Energy metabolism	Electron transport	NADH dehydrogenase (quinone), G subunit	NADH-quinone oxidoreductase subunit G	98 kDa	0.0004493	0.00015986	0.00066678	0.00014328	0.00019212	0.00026301	0.000425313	0.00019947	2.13222	0	3	3	true
PROKKA_03068	Energy metabolism	Other	-	NADP-dependent malic enzyme	45 kDa	0.0048124	0.0035101	0.0064276	0.0021486	0.0049386	0.0039439	0.0049167	0.00367703	1.33714	0	3	3	true
PROKKA_01450	Energy metabolism	Other	3-oxoadipate enol-lactonase	Non-heme chloroperoxidase	31 kDa	0.0044149	0.0034034	0.0021839	0.0040673	0.0045846	0.0041995	0.00333407	0.0042838	0.778297	0	3	3	true
PROKKA_02870	Energy metabolism	Glycolysis/gluconeogenesis	phosphoenolpyruvate carboxykinase (ATP)	Phosphoenolpyruvate carboxykinase [ATP]	55 kDa	0.0020585	0.001479	0.001175	0.00042082	0.0014025	0.0010428	0.00157083	0.000955373	1.64421	0	3	3	true
PROKKA_02420	Energy metabolism	Glycolysis/gluconeogenesis	-	Phosphoglycerate kinase	40 kDa	0.0027288	0.0016804	0.0023363	0.0014504	0.0017951	0.0019967	0.0022485	0.0017474	1.28677	0	3	3	true
PROKKA_03120	Energy metabolism	Pyruvate dehydrogenase	pyruvate dehydrogenase (acetyl-transferring), homodimeric type	Pyruvate dehydrogenase E1 component	99 kDa	0.0016597	0.00057412	0.0013684	0.00034306	0.0012391	0.00070842	0.00120074	0.000763527	1.57262	0	3	3	true
PROKKA_04632	Energy metabolism	Glycolysis/gluconeogenesis	pyruvate kinase	Pyruvate kinase II	52 kDa	0.0019341	0.0010472	0.0024959	0.0012515	0.0014897	0.0012306	0.00182573	0.00132393	1.37902	0	3	3	true
PROKKA_00334	Energy metabolism	TCA cycle	succinate dehydrogenase, flavoprotein subunit	Succinate dehydrogenase flavoprotein subunit	64 kDa	0.0025471	0.0015921	0.0025541	0.00065862	0.0018082	0.0014104	0.0022311	0.00129241	1.72631	0	3	3	true
PROKKA_00328	Energy metabolism	TCA cycle	succinate-CoA ligase, alpha subunit	Succinyl-CoA ligase [ADP-forming] subunit alpha	30 kDa	0.003327	0.0024661	0.0082289	0.0022104	0.0034718	0.0035501	0.004674	0.00307743	1.5188	0	3	3	true
PROKKA_00329	Energy metabolism	TCA cycle	succinate-CoA ligase, beta subunit	Succinyl-CoA ligase [ADP-forming] subunit beta	43 kDa	0.0094504	0.0053657	0.00746	0.0038474	0.0069396	0.0052966	0.00742537	0.0053612	1.38502	0	3	3	true
PROKKA_02220	Energy metabolism	Pentose phosphate pathway	transaldolase	Transaldolase	34 kDa	0.0038243	0.0030498	0.0048926	0.0032242	0.0022555	0.0018334	0.00392223	0.0024377	1.60899	0	3	3	true
PROKKA_03084	Fatty acid and phospholipid metabolism	Biosynthesis	putative 3-oxoacyl-(acyl-carrier-protein) reductase	3-oxoacyl-[acyl-carrier-protein] reductase FabG	26 kDa		0.00029858					0.00029858			0	1	off	false
PROKKA_01776	Fatty acid and phospholipid metabolism	Biosynthesis	3-oxoacyl-[acyl-carrier-protein] synthase III	3-oxoacyl-[acyl-carrier-protein] synthase 3	33 kDa		0.00035076					0.00035076			0	1	off	false
PROKKA_05501	Fatty acid and phospholipid metabolism	Other	cyclohexanecarboxyl-CoA dehydrogenase	Acyl-CoA dehydrogenase	65 kDa	0.00013516						0.00013516			0	1	off	false
PROKKA_01392	Fatty acid and phospholipid metabolism	Biosynthesis	3-oxoacyl-[acyl-carrier-protein] reductase	putative oxidoreductase YghA	30 kDa	0.00028503						0.00028503			0	1	off	false
PROKKA_01847	Fatty acid and phospholipid metabolism	Biosynthesis	3-oxoacyl-[acyl-carrier-protein] reductase	3-oxoacyl-[acyl-carrier-protein] reductase FabG	47 kDa	0.00027078	0.00024086					0.00025582		on T	0	2	off	false
PROKKA_05080	Fatty acid and phospholipid metabolism	Biosynthesis	malonyl CoA-acyl carrier protein transacylase	Malonyl CoA-acyl carrier protein transacylase	32 kDa	0.00026036	0.00023159					0.000245975		on T	0	2	off	false
PROKKA_00502	Fatty acid and phospholipid metabolism	Other	cyclohexanecarboxyl-CoA dehydrogenase	Acyl-CoA dehydrogenase	43 kDa					0.00012626			0.00012626		0	off	1	false
PROKKA_01577	Fatty acid and phospholipid metabolism	Biosynthesis	3-hydroxybutyrate dehydrogenase	3-oxoacyl-[acyl-carrier-protein] reductase FabG	27 kDa		0.000409		0.00032586			0.000409	0.00032586	1.25514	0	1	1	false
PROKKA_05077	Fatty acid and phospholipid metabolism	Biosynthesis	beta-ketoacyl-acyl-carrier-protein synthase II	3-oxoacyl-[acyl-carrier-protein] synthase 2	43 kDa	0.00019622			0.00020858			0.00019622	0.00020858	0.940742	0	1	1	false
PROKKA_05504	Fatty acid and phospholipid metabolism	Other	cyclohexanecarboxyl-CoA dehydrogenase	Acyl-CoA dehydrogenase	64 kDa	0.00013722					0.0001004	0.00013722	0.0001004	1.36673	0	1	1	false
PROKKA_00270	Fatty acid and phospholipid metabolism	Other	cyclohexanecarboxyl-CoA dehydrogenase	Acyl-coenzyme A dehydrogenase	89 kDa	0.00034885				0.00015221		0.00034885	0.00015221	2.2919	0	1	1	false
PROKKA_05542	Fatty acid and phospholipid metabolism	Biosynthesis	3-oxoacyl-[acyl-carrier-protein] reductase	Glucose 1-dehydrogenase 1	27 kDa	0.00031982	0.00042672			0.00019536		0.00037327	0.00019536	1.91068	0	2	1	false
PROKKA_03161	Fatty acid and phospholipid metabolism	Biosynthesis	phosphatidylserine decarboxylase	Phosphatidylserine decarboxylase proenzyme	31 kDa	0.00071008	0.00075795			0.0001735		0.000734015	0.0001735	4.23063	0	2	1	false
PROKKA_00677	Fatty acid and phospholipid metabolism	Biosynthesis	acetyl-CoA carboxylase, biotin carboxylase subunit	2-oxoglutarate carboxylase small subunit	52 kDa					0.00015803	0.0001893		0.000173665	on UT	0	off	2	false
PROKKA_01444	Fatty acid and phospholipid metabolism	Other	acetyl-CoA C-acyltransferase	Acetyl-CoA acetyltransferase	40 kDa					0.00082071	0.00068061		0.00075066	on UT	0	off	2	false
PROKKA_05221	Fatty acid and phospholipid metabolism	Other	cyclohexanecarboxyl-CoA dehydrogenase	Acyl-CoA dehydrogenase	42 kDa					0.00071258	0.00062078		0.00066668	on UT	0	off	2	false
PROKKA_05219	Fatty acid and phospholipid metabolism	Other	cyclohexanecarboxyl-CoA dehydrogenase	Acyl-CoA dehydrogenase	41 kDa					0.0014556	0.001268		0.0013618	on UT	0	off	2	false
PROKKA_05661	Fatty acid and phospholipid metabolism	Other	dicarboxylate--CoA ligase PimA	Long-chain-fatty-acid--CoA ligase	61 kDa					0.00030848	0.00010558		0.00020703	on UT	0	off	2	false
PROKKA_01442	Fatty acid and phospholipid metabolism	Other	3-oxoacid CoA-transferase, A subunit	putative succinyl-CoA:3-ketoacid coenzyme A transferase subunit A	25 kDa				0.0011166	0.0010694			0.001093	on UT	0	off	2	false
PROKKA_05536	Fatty acid and phospholipid metabolism	Biosynthesis	acetyl-CoA carboxylase, carboxyl transferase, beta subunit	Acetyl-coenzyme A carboxylase carboxyl transferase subunit beta	33 kDa	0.00053094			0.0002822		0.00019425	0.00053094	0.000238225	2.22873	0	1	2	false
PROKKA_05078	Fatty acid and phospholipid metabolism	Biosynthesis	acyl carrier protein	Acyl carrier protein	9 kDa			0.0077278		0.0054074	0.0053343	0.0077278	0.00537085	1.43884	0	1	2	false
PROKKA_04753	Fatty acid and phospholipid metabolism	Biosynthesis	acetyl-CoA carboxylase, carboxyl transferase, alpha subunit	Acetyl-coenzyme A carboxylase carboxyl transferase subunit alpha	35 kDa	0.00064471	0.00022939		0.00027414		0.00028305	0.00043705	0.000278595	1.56876	0	2	2	true
PROKKA_03268	Fatty acid and phospholipid metabolism	Biosynthesis	acetyl-CoA carboxylase, biotin carboxyl carrier protein	Biotin carboxyl carrier protein of acetyl-CoA carboxylase	16 kDa	0.0039562	0.002346			0.0022555	0.0025088	0.0031511	0.00238215	1.3228	0	2	2	true
PROKKA_02046	Fatty acid and phospholipid metabolism	Other	2-methylcitrate synthase/citrate synthase II	2-methylcitrate synthase	42 kDa				0.0013816	0.0019848	0.001268		0.0015448	on UT	0	off	3	false
PROKKA_04758	Fatty acid and phospholipid metabolism	Biosynthesis	beta-hydroxyacyl-(acyl-carrier-protein) dehydratase FabZ	3-hydroxyacyl-[acyl-carrier-protein] dehydratase FabZ	17 kDa				0.00059146	0.00050981	0.00081424		0.000638503	on UT	0	off	3	false
PROKKA_05218	Fatty acid and phospholipid metabolism	Other	acetyl-CoA C-acyltransferase	Acetyl-CoA acetyltransferase	41 kDa				0.0012054	0.0016372	0.0011315		0.0013247	on UT	0	off	3	false
PROKKA_02045	Fatty acid and phospholipid metabolism	Other	2-methylisocitrate dehydratase, Fe/S-dependent	Aconitate hydratase 1	94 kDa				9.9945e-05	0.00031588	0.00020639		0.000207405	on UT	0	off	3	false
PROKKA_02582	Fatty acid and phospholipid metabolism	Other	cyclohexanecarboxyl-CoA dehydrogenase	Acyl-CoA dehydrogenase	43 kDa				0.0006694	0.0014104	0.00092155		0.00100045	on UT	0	off	3	false
PROKKA_01871	Fatty acid and phospholipid metabolism	Other	acetate--CoA ligase	Acetyl-coenzyme A synthetase	72 kDa	0.00018717			0.00019897	0.001029	0.00036522	0.00018717	0.000531063	0.352444	0	1	3	false
PROKKA_01803	Fatty acid and phospholipid metabolism	Other	-	Putative outer membrane protein precursor	46 kDa		0.00017002		0.00030477	0.00017513	0.00013986	0.00017002	0.000206587	0.822996	0	1	3	false
PROKKA_00313	Fatty acid and phospholipid metabolism	Biosynthesis	beta-hydroxyacyl-(acyl-carrier-protein) dehydratase FabA	3-hydroxydecanoyl-[acyl-carrier-protein] dehydratase	19 kDa	0.0023752	0.0021128		0.0025249	0.0029018	0.0027808	0.002244	0.00273583	0.820225	0	2	3	true
PROKKA_05217	Fatty acid and phospholipid metabolism	Biosynthesis	3-oxoacyl-[acyl-carrier-protein] reductase	3-oxoacyl-[acyl-carrier-protein] reductase FabG	26 kDa	0.00031856	0.00099177		0.0055875	0.0036973	0.0045454	0.000655165	0.00461007	0.142116	1	2	3	true
PROKKA_03646	Fatty acid and phospholipid metabolism	Biosynthesis	acyl-CoA thioesterase II	Acyl-CoA thioesterase 2	32 kDa	0.00028108	0.00037504		0.0004482	0.0003434	0.00020567	0.00032806	0.000332423	0.986874	0	2	3	true
PROKKA_03267	Fatty acid and phospholipid metabolism	Biosynthesis	acetyl-CoA carboxylase, biotin carboxylase subunit	Biotin carboxylase	49 kDa	0.00089661	0.00047853		0.00019062	0.0016979	0.00085289	0.00068757	0.000913803	0.752427	0	2	3	true
PROKKA_01830	Fatty acid and phospholipid metabolism	Biosynthesis	3-oxoacyl-[acyl-carrier-protein] reductase	C-factor	24 kDa	0.00035629	0.00031692		0.00056811	0.00054409	0.00091245	0.000336605	0.000674883	0.49876	1	2	3	true
PROKKA_02252	Fatty acid and phospholipid metabolism	Degradation	fatty oxidation complex, alpha subunit FadB	Fatty acid oxidation complex subunit alpha	77 kDa	0.0008521	0.00035371		0.00042271	0.0009716	0.0003741	0.000602905	0.00058947	1.02279	0	2	3	true
PROKKA_01443	Fatty acid and phospholipid metabolism	Other	3-oxoacid CoA-transferase, B subunit	putative succinyl-CoA:3-ketoacid coenzyme A transferase subunit B	23 kDa	0.00037093	0.00032994		0.0011829	0.00067974	0.0010857	0.000350435	0.00098278	0.356575	0	2	3	true
PROKKA_05079	Fatty acid and phospholipid metabolism	Biosynthesis	3-oxoacyl-[acyl-carrier-protein] reductase	3-oxoacyl-[acyl-carrier-protein] reductase FabG	26 kDa	0.0023022	0.0032179	0.0036605	0.002622	0.0018081	0.0019252	0.0030602	0.00211843	1.44456	0	3	3	true
PROKKA_00314	Fatty acid and phospholipid metabolism	Biosynthesis	beta-ketoacyl-acyl-carrier-protein synthase II	3-oxoacyl-[acyl-carrier-protein] synthase 1	43 kDa	0.0029012	0.0020467	0.0014846	0.00095711	0.0015889	0.00095162	0.00214417	0.00116588	1.8391	0	3	3	true
PROKKA_01305	Fatty acid and phospholipid metabolism	Biosynthesis	3-oxoacyl-[acyl-carrier-protein] reductase	Cyclopentanol dehydrogenase	27 kDa	0.0023799	0.0025403	0.0058864	0.0020239	0.0021322	0.0015092	0.0036022	0.00188843	1.90751	1	3	3	true
PROKKA_04484	Fatty acid and phospholipid metabolism	Biosynthesis	3-hydroxybutyrate dehydrogenase	putative oxidoreductase YciK	26 kDa	0.00066043	0.00044059	0.0024503	0.00052654	0.00040342	0.00060406	0.00118377	0.00051134	2.31504	0	3	3	true
PROKKA_05075	Hypothetical proteins	Conserved	conserved hypothetical protein, YceG family	putative aminodeoxychorismate lyase	42 kDa		0.00019116					0.00019116			0	1	off	false
PROKKA_04880	Hypothetical proteins	Conserved	TIGR00730 family protein	putative lysine decarboxylase	42 kDa		0.00029294					0.00029294			0	1	off	false
PROKKA_03171	No classification	No classification	YjeF family C-terminal domain	Bifunctional NAD(P)H-hydrate repair enzyme Nnr	29 kDa		0.00037897					0.00037897			0	1	off	false
PROKKA_01691	No classification	No classification	-	Carboxylesterase 2	24 kDa		0.00049718					0.00049718			0	1	off	false
PROKKA_02663	No classification	No classification	-	Glutathionyl-hydroquinone reductase YqjG	38 kDa		0.00032745					0.00032745			0	1	off	false
PROKKA_03278	No classification	Unknown function	-	hypothetical protein	178 kDa		4.4303e-05					4.4303e-05			0	1	off	false
PROKKA_01044	No classification	Unknown function	TIGR02099 family protein	hypothetical protein	138 kDa		5.6851e-05					5.6851e-05			0	1	off	false
PROKKA_02817	No classification	Unknown function	-	hypothetical protein	39 kDa		0.00020884					0.00020884			0	1	off	false
PROKKA_01446	No classification	Unknown function	-	hypothetical protein	29 kDa		0.0002737					0.0002737			0	1	off	false
PROKKA_00112	No classification	Unknown function	-	hypothetical protein	24 kDa		0.00032402					0.00032402			0	1	off	false
PROKKA_05471	No classification	Unknown function	-	hypothetical protein	18 kDa		0.0003803					0.0003803			0	1	off	false
PROKKA_01098	No classification	Unknown function	-	hypothetical protein	20 kDa		0.00039058					0.00039058			0	1	off	false
PROKKA_03087	No classification	Unknown function	-	hypothetical protein	18 kDa		0.00045161					0.00045161			0	1	off	false
PROKKA_01077	No classification	Unknown function	cupin fold metalloprotein, WbuC family	hypothetical protein	17 kDa	0.00052409						0.00052409			0	1	off	false
PROKKA_04678	No classification	Unknown function	-	hypothetical protein	123 kDa			0.00055915				0.00055915			0	1	off	false
PROKKA_00379	No classification	Unknown function	-	hypothetical protein	11 kDa		0.00069478					0.00069478			0	1	off	false
PROKKA_01078	No classification	Unknown function	-	hypothetical protein	11 kDa		0.00076061					0.00076061			0	1	off	false
PROKKA_03849	No classification	No classification	-	Lipid A deacylase PagL precursor	19 kDa		0.0012603					0.0012603			0	1	off	false
PROKKA_05592	No classification	No classification	-	P-aminobenzoate N-oxygenase AurF	35 kDa		0.00070153					0.00070153			0	1	off	false
PROKKA_03580	No classification	No classification	polyprenyl P-hydroxybenzoate and phenylacrylic acid decarboxylases	putative aromatic acid decarboxylase	23 kDa	0.00038868						0.00038868			0	1	off	false
PROKKA_04566	No classification	No classification	-	Putative lipoprotein/NMB1164 precursor	24 kDa	0.00035944						0.00035944			0	1	off	false
PROKKA_00344	No classification	No classification	-	putative phospholipid-binding lipoprotein MlaA precursor	30 kDa		0.00027579					0.00027579			0	1	off	false
PROKKA_05122	No classification	No classification	-	Small heat shock protein IbpB	17 kDa		0.00095076					0.00095076			0	1	off	false
PROKKA_02236	No classification	No classification	dihydrolipoyl dehydrogenase	Soluble pyridine nucleotide transhydrogenase	51 kDa	0.00017507						0.00017507			0	1	off	false
PROKKA_02722	No classification	No classification	amino acid adenylation domain	Tyrocidine synthase 3	410 kDa	3.2278e-05						3.2278e-05			0	1	off	false
PROKKA_03843	No classification	No classification	putative PEP-CTERM system TPR-repeat lipoprotein	bacteriophage N4 receptor, outer membrane subunit	65 kDa	0.00028304	0.00018883					0.000235935		on T	0	2	off	false
PROKKA_03861	No classification	No classification	squalene-associated FAD-dependent desaturase	Dehydrosqualene desaturase	36 kDa	0.00024766	0.0002203					0.00023398		on T	0	2	off	false
PROKKA_05325	No classification	No classification	voltage-dependent potassium channel beta subunit	General stress protein 69	40 kDa	0.00056727	0.00020184					0.000384555		on T	0	2	off	false
PROKKA_03224	No classification	No classification	-	putative assembly protein	74 kDa	0.00017711	0.00010503					0.00014107		on T	0	2	off	false
PROKKA_00705	No classification	No classification	-	Putative glucose-6-phosphate 1-epimerase	33 kDa	0.00095089	0.00072499					0.00083794		on T	0	2	off	false
PROKKA_01433	No classification	No classification	-	Transglutaminase-like superfamily protein	69 kDa	0.0003937	0.0003502					0.00037195		on T	0	2	off	false
PROKKA_03150	No classification	No classification	nudix-type nucleoside diphosphatase, YffH/AdpP family	ADP-ribose pyrophosphatase	23 kDa						0.00028995		0.00028995		0	off	1	false
PROKKA_02293	No classification	No classification	-	Cache domain protein	31 kDa				0.00030951				0.00030951		0	off	1	false
PROKKA_05258	No classification	No classification	-	CsbD-like protein	8 kDa				0.0010531				0.0010531		0	off	1	false
PROKKA_03447	No classification	No classification	-	CYTH domain protein	52 kDa					0.00010906			0.00010906		0	off	1	false
PROKKA_03476	No classification	Unknown function	-	hypothetical protein	27 kDa					0.00019848			0.00019848		0	off	1	false
PROKKA_00521	No classification	Unknown function	-	hypothetical protein	22 kDa					0.00024444			0.00024444		0	off	1	false
PROKKA_05204	No classification	Unknown function	-	hypothetical protein	24 kDa						0.00026655		0.00026655		0	off	1	false
PROKKA_05752	No classification	Unknown function	-	hypothetical protein	19 kDa					0.00026968			0.00026968		0	off	1	false
PROKKA_05083	No classification	Unknown function	-	hypothetical protein	20 kDa					0.00028194			0.00028194		0	off	1	false
PROKKA_05489	No classification	Unknown function	-	hypothetical protein	18 kDa					0.00029189			0.00029189		0	off	1	false
PROKKA_05243	No classification	Unknown function	-	hypothetical protein	30 kDa				0.00032101				0.00032101		0	off	1	false
PROKKA_02980	No classification	Unknown function	-	hypothetical protein	21 kDa						0.0003213		0.0003213		0	off	1	false
PROKKA_03395	No classification	Unknown function	-	hypothetical protein	32 kDa					0.00038053			0.00038053		0	off	1	false
PROKKA_01996	No classification	Unknown function	-	hypothetical protein	21 kDa				0.00044057				0.00044057		0	off	1	false
PROKKA_04448	No classification	Unknown function	-	hypothetical protein	20 kDa				0.00044512				0.00044512		0	off	1	false
PROKKA_04933	No classification	Unknown function	-	hypothetical protein	17 kDa					0.00048332			0.00048332		0	off	1	false
PROKKA_04927	No classification	No classification	putative alkylphosphonate utilization operon protein PhnA	hypothetical protein	12 kDa						0.00052601		0.00052601		0	off	1	false
PROKKA_04785	No classification	Unknown function	-	hypothetical protein	14 kDa					0.00055964			0.00055964		0	off	1	false
PROKKA_02413	No classification	Unknown function	-	hypothetical protein	16 kDa				0.00058743				0.00058743		0	off	1	false
PROKKA_03538	No classification	Unknown function	-	hypothetical protein	21 kDa				0.0006509				0.0006509		0	off	1	false
PROKKA_02226	No classification	Unknown function	-	hypothetical protein	10 kDa						0.00067545		0.00067545		0	off	1	false
PROKKA_02254	No classification	Unknown function	-	hypothetical protein	16 kDa						0.00081424		0.00081424		0	off	1	false
PROKKA_01589	No classification	Unknown function	-	hypothetical protein	8 kDa				0.0011669				0.0011669		0	off	1	false
PROKKA_00575	No classification	Unknown function	-	hypothetical protein	8 kDa					0.0017472			0.0017472		0	off	1	false
PROKKA_05455	No classification	No classification	-	Low specificity L-threonine aldolase	38 kDa					0.00014341			0.00014341		0	off	1	false
PROKKA_02996	No classification	No classification	phage shock operon rhodanese PspE	molybdopterin biosynthesis protein MoeB	15 kDa						0.0006508		0.0006508		0	off	1	false
PROKKA_04719	No classification	No classification	putative enoyl-[acyl-carrier-protein] reductase II	Nitronate monooxygenase	34 kDa					0.00015507			0.00015507		0	off	1	false
PROKKA_03383	No classification	No classification	TIGR02647 family protein	Phosphate-starvation-inducible E	9 kDa					0.00059073			0.00059073		0	off	1	false
PROKKA_02428	No classification	No classification	-	putative acyltransferase	17 kDa				0.00057568				0.00057568		0	off	1	false
PROKKA_04129	No classification	No classification	-	putative M18 family aminopeptidase 2	47 kDa					0.00023133			0.00023133		0	off	1	false
PROKKA_02033	No classification	No classification	RraA family	Putative regulator of ribonuclease activity	17 kDa				0.00052977				0.00052977		0	off	1	false
PROKKA_05644	No classification	No classification	-	putative sugar isomerase YihS	46 kDa						0.00035465		0.00035465		0	off	1	false
PROKKA_00717	No classification	No classification	-	Secreted repeat of unknown function	14 kDa				0.0010362				0.0010362		0	off	1	false
PROKKA_02256	No classification	No classification	-	Soluble lytic murein transglycosylase precursor	74 kDa					7.7292e-05			7.7292e-05		0	off	1	false
PROKKA_02085	No classification	No classification	-	START domain protein	22 kDa						0.00029572		0.00029572		0	off	1	false
PROKKA_02347	No classification	No classification	putative PEP-CTERM system TPR-repeat lipoprotein	TPR repeat-containing protein YfgC precursor	53 kDa						0.00012461		0.00012461		0	off	1	false
PROKKA_01609	No classification	No classification	-	Chagasin family peptidase inhibitor I42	14 kDa		0.0011203				0.00069116	0.0011203	0.00069116	1.6209	0	1	1	false
PROKKA_05213	No classification	No classification	KaiC domain protein, AF_0351 family	Circadian clock protein kinase KaiC	55 kDa	0.00040698				9.9441e-05		0.00040698	9.9441e-05	4.09268	0	1	1	false
PROKKA_04068	No classification	No classification	-	DSBA-like thioredoxin domain protein	24 kDa		0.00033298		0.00039794			0.00033298	0.00039794	0.836759	0	1	1	false
PROKKA_03400	No classification	No classification	FTR1 family protein	Ferrous iron permease EfeU precursor	67 kDa	0.00019311				0.00011796		0.00019311	0.00011796	1.63708	0	1	1	false
PROKKA_01509	No classification	No classification	-	Glyoxalase-like domain protein	16 kDa		0.0005053				0.00041566	0.0005053	0.00041566	1.21566	0	1	1	false
PROKKA_05137	No classification	Unknown function	-	hypothetical protein	24 kDa		0.00031145		0.00055831			0.00031145	0.00055831	0.557844	0	1	1	false
PROKKA_00302	No classification	Unknown function	-	hypothetical protein	29 kDa		0.00026565		0.00031747			0.00026565	0.00031747	0.836772	0	1	1	false
PROKKA_01934	No classification	Unknown function	-	hypothetical protein	31 kDa		0.00025992		0.00031062			0.00025992	0.00031062	0.836778	0	1	1	false
PROKKA_01727	No classification	Unknown function	-	hypothetical protein	10 kDa		0.0007687		0.00091864			0.0007687	0.00091864	0.83678	0	1	1	false
PROKKA_02240	No classification	Unknown function	-	hypothetical protein	21 kDa		0.00038435				0.00031617	0.00038435	0.00031617	1.21564	0	1	1	false
PROKKA_03566	No classification	Unknown function	-	hypothetical protein	25 kDa		0.00030618				0.00025186	0.00030618	0.00025186	1.21568	0	1	1	false
PROKKA_03149	No classification	Unknown function	-	hypothetical protein	28 kDa		0.0007284		0.00052229			0.0007284	0.00052229	1.39463	0	1	1	false
PROKKA_00120	No classification	Unknown function	-	hypothetical protein	84 kDa		9.4454e-05			6.4864e-05		9.4454e-05	6.4864e-05	1.45619	0	1	1	false
PROKKA_02551	No classification	Unknown function	-	hypothetical protein	27 kDa		0.00027474			0.00018867		0.00027474	0.00018867	1.45619	0	1	1	false
PROKKA_02834	No classification	Unknown function	-	hypothetical protein	136 kDa	0.0001355				4.1385e-05		0.0001355	4.1385e-05	3.27413	0	1	1	false
PROKKA_00524	No classification	No classification	-	Inhibitor of vertebrate lysozyme precursor	17 kDa		0.00069927			0.00032014		0.00069927	0.00032014	2.18426	0	1	1	false
PROKKA_05031	No classification	No classification	-	Iron uptake system component EfeO precursor	43 kDa		0.00018064			0.00018608		0.00018064	0.00018608	0.970765	0	1	1	false
PROKKA_05236	No classification	No classification	-	Methyl-accepting chemotaxis protein McpS	59 kDa	0.0001469			0.00015615			0.0001469	0.00015615	0.940762	0	1	1	false
PROKKA_05559	No classification	No classification	-	Porin D precursor	46 kDa		0.00016962		0.00020271			0.00016962	0.00020271	0.836762	0	1	1	false
PROKKA_03421	No classification	No classification	decarboxylase, UbiD family	3-octaprenyl-4-hydroxybenzoate carboxy-lyase	55 kDa	0.00058262	0.0002221			0.00015252		0.00040236	0.00015252	2.63808	0	2	1	false
PROKKA_01981	No classification	No classification	-	FixH	20 kDa	0.00045382	0.00040367			0.00027721		0.000428745	0.00027721	1.54664	0	2	1	false
PROKKA_04673	No classification	Unknown function	-	hypothetical protein	36 kDa	0.00051251	0.00056985		0.00040861			0.00054118	0.00040861	1.32444	0	2	1	false
PROKKA_03866	No classification	No classification	dinuclear metal center protein, YbgI/SA1388 family	Putative GTP cyclohydrolase 1 type 2	27 kDa	0.00032235	0.0004301		0.000514			0.000376225	0.000514	0.731955	0	2	1	false
PROKKA_05024	No classification	No classification	dehydrogenase, PQQ-dependent, s-GDH family	Soluble aldose sugar dehydrogenase YliI precursor	42 kDa	0.00031649	0.00028152		0.00044858			0.000299005	0.00044858	0.666559	0	2	1	false
PROKKA_00175	No classification	No classification	-	Carboxymethylenebutenolidase	32 kDa				0.00029272	0.00025231			0.000272515	on UT	0	off	2	false
PROKKA_03131	No classification	No classification	-	Decarbamoylnovobiocin carbamoyltransferase	66 kDa					0.00033929	0.00025402		0.000296655	on UT	0	off	2	false
PROKKA_05205	No classification	Unknown function	-	hypothetical protein	52 kDa					0.00010648	0.00012755		0.000117015	on UT	0	off	2	false
PROKKA_03689	No classification	Unknown function	-	hypothetical protein	31 kDa					0.00044147	0.00031729		0.00037938	on UT	0	off	2	false
PROKKA_04718	No classification	Unknown function	-	hypothetical protein	34 kDa					0.0003901	0.00037383		0.000381965	on UT	0	off	2	false
PROKKA_02569	No classification	No classification	-	putative chaperone protein EcpD	29 kDa				0.00032959		0.00022687		0.00027823	on UT	0	off	2	false
PROKKA_00373	No classification	No classification	-	putative lipoprotein YgdR precursor	8 kDa					0.0013595	0.0016285		0.001494	on UT	0	off	2	false
PROKKA_01786	No classification	No classification	-	Putative pterin-4-alpha-carbinolamine dehydratase	13 kDa					0.00084104	0.0010075		0.00092427	on UT	0	off	2	false
PROKKA_03426	No classification	No classification	putative NAD(P)H quinone oxidoreductase, PIG3 family	Quinone oxidoreductase 1	34 kDa				0.0002657	0.00015268			0.00020919	on UT	0	off	2	false
PROKKA_04378	No classification	No classification	-	SCP-2 sterol transfer family protein	11 kDa				0.0024909		0.0017146		0.00210275	on UT	0	off	2	false
PROKKA_00834	No classification	No classification	-	Serralysin precursor	49 kDa					0.00015604	0.00018692		0.00017148	on UT	0	off	2	false
PROKKA_00181	No classification	No classification	amidohydrolase, AtzE family	Biuret hydrolase	60 kDa		0.00019082			0.00026208	0.00015697	0.00019082	0.000209525	0.910727	0	1	2	false
PROKKA_00859	No classification	No classification	-	Decarbamoylnovobiocin carbamoyltransferase	58 kDa		0.00020884			0.00028683	0.00022905	0.00020884	0.00025794	0.809646	0	1	2	false
PROKKA_01012	No classification	Unknown function	-	hypothetical protein	16 kDa		0.00049833		0.0008933		0.00061489	0.00049833	0.000754095	0.660832	0	1	2	false
PROKKA_02831	No classification	Unknown function	-	hypothetical protein	36 kDa		0.00054575		0.0010435		0.00017958	0.00054575	0.00061154	0.892419	0	1	2	false
PROKKA_04262	No classification	Unknown function	-	hypothetical protein	9 kDa		0.00081188		0.00097025	0.00083631		0.00081188	0.00090328	0.898813	0	1	2	false
PROKKA_00440	No classification	Unknown function	-	hypothetical protein	16 kDa		0.00050179		0.00059967		0.00041278	0.00050179	0.000506225	0.991239	0	1	2	false
PROKKA_03325	No classification	Unknown function	-	hypothetical protein	26 kDa		0.00044059		0.00035103		0.00024162	0.00044059	0.000296325	1.48685	0	1	2	false
PROKKA_02832	No classification	Unknown function	-	hypothetical protein	51 kDa		0.00071463			0.00059982	0.00032659	0.00071463	0.000463205	1.54279	0	1	2	false
PROKKA_01302	No classification	Unknown function	-	hypothetical protein	19 kDa		0.00062651		0.00049915	0.00028683		0.00062651	0.00039299	1.59421	0	1	2	false
PROKKA_04396	No classification	Unknown function	-	hypothetical protein	24 kDa		0.00050179		0.00039978	0.00022973		0.00050179	0.000314755	1.59422	0	1	2	false
PROKKA_03293	No classification	Unknown function	-	hypothetical protein	21 kDa		0.00098712		0.00047187		0.00048721	0.00098712	0.00047954	2.05847	0	1	2	false
PROKKA_04272	No classification	No classification	Cof-like hydrolase	Pyridoxal phosphate phosphatase YigL	29 kDa	0.00029647				0.0001811	0.00021693	0.00029647	0.000199015	1.48969	0	1	2	false
PROKKA_03162	No classification	No classification	-	Thiosulfate sulfurtransferase	30 kDa	0.00029975				0.0001831	0.00043867	0.00029975	0.000310885	0.964183	0	1	2	false
PROKKA_05577	No classification	No classification	tol-pal system protein YbgF	tol-pal system protein YbgF	29 kDa		0.0002618			0.00053936	0.00043072	0.0002618	0.00048504	0.539749	0	1	2	false
PROKKA_03927	No classification	No classification	-	Xylose isomerase-like TIM barrel	29 kDa		0.00027791		0.00033213	0.00019085		0.00027791	0.00026149	1.06279	0	1	2	false
PROKKA_03745	No classification	No classification	-	AsmA family protein	107 kDa	0.00025046	0.00018566			0.00020399	0.00012218	0.00021806	0.000163085	1.33709	0	2	2	true
PROKKA_00319	No classification	No classification	-	Dienelactone hydrolase family protein	26 kDa	0.00067135	0.0013436		0.0012489		0.00098247	0.00100747	0.00111568	0.90301	0	2	2	true
PROKKA_05606	No classification	Unknown function	-	hypothetical protein	14 kDa	0.0020308	0.0027097		0.0028784		0.0027243	0.00237025	0.00280135	0.84611	1	2	2	true
PROKKA_03698	No classification	Unknown function	-	hypothetical protein	67 kDa	0.00040148	0.0002976			0.00032699	0.00014689	0.00034954	0.00023694	1.47523	0	2	2	true
PROKKA_04466	No classification	No classification	TIGR00730 family protein	LOG family protein YgdH	51 kDa	0.00026663	0.00031623			0.00038003	0.00026013	0.00029143	0.00032008	0.910491	0	2	2	true
PROKKA_03246	No classification	No classification	-	PepSY-associated TM helix	50 kDa	0.00035865	0.00063804		0.00038125	0.00038339		0.000498345	0.00038232	1.30348	0	2	2	true
PROKKA_05133	No classification	No classification	-	Putative NAD(P)H nitroreductase	24 kDa	0.00057476	0.00085209		0.0010183		0.00098132	0.000713425	0.00099981	0.713561	1	2	2	true
PROKKA_03391	No classification	No classification	heme biosynthesis-associated TPR protein	putative protoheme IX biogenesis protein	46 kDa	0.00039338	0.00034992			0.00018022	0.00021588	0.00037165	0.00019805	1.87655	1	2	2	true
PROKKA_05558	No classification	No classification	-	Small-conductance mechanosensitive channel	31 kDa	0.00058024	0.00064516			0.0010633	0.000743	0.0006127	0.00090315	0.678403	1	2	2	true
PROKKA_00671	No classification	No classification	-	Tim44-like domain protein	31 kDa	0.00042309	0.00075268		0.00059967		0.00061916	0.000587885	0.000609415	0.964671	0	2	2	true
PROKKA_01698	No classification	No classification	-	PhoH-like protein	52 kDa	0.00026261	0.00015573	0.0012991		0.00042777	0.00025621	0.00057248	0.00034199	1.67397	0	3	2	true
PROKKA_01563	No classification	No classification	alkylhydroperoxidase AhpD family core domain	Carboxymuconolactone decarboxylase family protein	16 kDa				0.0014888	0.0018822	0.0016397		0.00167023	on UT	0	off	3	false
PROKKA_00144	No classification	No classification	-	Cupin domain protein	14 kDa				0.00064927	0.00037309	0.00044691		0.000489757	on UT	0	off	3	false
PROKKA_02708	No classification	Unknown function	-	hypothetical protein	65 kDa				0.00022333	0.00038499	0.00025621		0.000288177	on UT	0	off	3	false
PROKKA_05173	No classification	Unknown function	-	hypothetical protein	13 kDa				0.00071366	0.00082018	0.0014737		0.00100251	on UT	0	off	3	false
PROKKA_00895	No classification	No classification	-	Indole-3-glycerol phosphate synthase	28 kDa				0.0013184	0.0017045	0.0023821		0.00180167	on UT	0	off	3	false
PROKKA_05375	No classification	No classification	-	Membrane dipeptidase (Peptidase family M19)	49 kDa				0.00019232	0.00011051	0.00013238		0.00014507	on UT	0	off	3	false
PROKKA_03324	No classification	No classification	-	NAD dependent epimerase/dehydratase family protein	31 kDa				0.0009154	0.00061369	0.0006301		0.00071973	on UT	0	off	3	false
PROKKA_02300	No classification	No classification	-	NmrA-like family protein	21 kDa				0.0004233	0.00024324	0.00029137		0.000319303	on UT	0	off	3	false
PROKKA_01002	No classification	No classification	-	Porin D precursor	51 kDa				0.0001861	0.0003743	0.00019215		0.00025085	on UT	0	off	3	false
PROKKA_04341	No classification	Unknown function	-	hypothetical protein	22 kDa		0.00035771		0.00042749	0.0011054	0.0010299	0.00035771	0.000854263	0.418735	0	1	3	false
PROKKA_04342	No classification	Unknown function	-	hypothetical protein	17 kDa		0.00045161		0.0010794	0.00077533	0.0013002	0.00045161	0.00105164	0.429433	0	1	3	false
PROKKA_03157	No classification	Unknown function	-	hypothetical protein	25 kDa		0.00030618		0.00091475	0.00031539	0.00075559	0.00030618	0.00066191	0.46257	0	1	3	false
PROKKA_04622	No classification	Unknown function	-	hypothetical protein	14 kDa		0.0014568		0.0041784	0.0014006	0.0014381	0.0014568	0.00233903	0.622821	0	1	3	false
PROKKA_03249	No classification	Unknown function	-	hypothetical protein	17 kDa		0.00067741		0.00080956	0.0009304	0.0013002	0.00067741	0.00101339	0.668462	0	1	3	false
PROKKA_03082	No classification	Unknown function	-	hypothetical protein	17 kDa		0.00072257		0.0014392	0.00049621	0.00039626	0.00072257	0.000777223	0.929681	0	1	3	false
PROKKA_03480	No classification	Unknown function	-	hypothetical protein	16 kDa		0.0024746		0.0041402	0.0011895	0.0024427	0.0024746	0.0025908	0.955149	0	1	3	false
PROKKA_01865	No classification	Unknown function	-	hypothetical protein	22 kDa		0.00037439		0.00044742	0.0002571	0.00046197	0.00037439	0.00038883	0.962863	0	1	3	false
PROKKA_03542	No classification	Unknown function	-	hypothetical protein	16 kDa		0.00071779		0.00085781	0.00032862	0.0009841	0.00071779	0.00072351	0.992094	0	1	3	false
PROKKA_03295	No classification	Unknown function	-	hypothetical protein	16 kDa		0.00075268		0.0014992	0.00034459	0.00041278	0.00075268	0.00075219	1.00065	0	1	3	false
PROKKA_03582	No classification	Unknown function	-	hypothetical protein	23 kDa		0.00067847		0.0010135	0.00046593	0.00027906	0.00067847	0.000586163	1.15748	0	1	3	false
PROKKA_04395	No classification	Unknown function	-	hypothetical protein	19 kDa		0.0014965		0.0020438	0.00088085	0.00087928	0.0014965	0.00126798	1.18023	0	1	3	false
PROKKA_02833	No classification	Unknown function	-	hypothetical protein	19 kDa		0.0023106		0.0030123	0.0010097	0.0017279	0.0023106	0.00191663	1.20555	0	1	3	false
PROKKA_01143	No classification	Unknown function	-	hypothetical protein	15 kDa		0.00081493		0.00064927	0.00037309	0.00067037	0.00081493	0.000564243	1.44429	0	1	3	false
PROKKA_05473	No classification	Unknown function	-	hypothetical protein	18 kDa		0.00065293		0.0005202	0.00044838	0.00035807	0.00065293	0.000442217	1.47649	0	1	3	false
PROKKA_01655	No classification	Unknown function	-	hypothetical protein	17 kDa		0.001495		0.0008933	0.00068443	0.00081986	0.001495	0.000799197	1.87063	0	1	3	false
PROKKA_01600	No classification	No classification	-	NADPH-dependent ferric-chelate reductase	28 kDa	0.00031856			0.00067728	0.00058378	0.00046619	0.00031856	0.00057575	0.553296	0	1	3	false
PROKKA_05594	No classification	No classification	-	Polyketide cyclase / dehydrase and lipid transport	17 kDa		0.0020978		0.0036212	0.0030413	0.0034513	0.0020978	0.00337127	0.622259	0	1	3	false
PROKKA_00623	No classification	No classification	nucleoid occlusion protein	putative chromosome-partitioning protein ParB	32 kDa	0.00028011			0.00044665	0.00034221	0.00030745	0.00028011	0.000365437	0.766508	0	1	3	false
PROKKA_01066	No classification	No classification	outer membrane lipid asymmetry maintenance protein MlaD	putative phospholipid ABC transporter-binding protein MlaD	16 kDa		0.00069927		0.00055711	0.00032014	0.0009587	0.00069927	0.000611983	1.14263	0	1	3	false
PROKKA_01067	No classification	No classification	hopanoid biosynthesis associated membrane protein HpnM	putative phospholipid-binding protein MlaC precursor	23 kDa	0.00037783			0.0010041	0.00034619	0.0011059	0.00037783	0.00081873	0.461483	0	1	3	false
PROKKA_03465	No classification	No classification	-	Putrescine-binding periplasmic protein precursor	39 kDa		0.00030531		0.00024325	0.00013978	0.00033487	0.00030531	0.0002393	1.27585	0	1	3	false
PROKKA_00592	No classification	No classification	putative NAD(P)H quinone oxidoreductase, PIG3 family	Quinone oxidoreductase 1	34 kDa	0.0004999			0.00039855	0.00083974	0.00091446	0.0004999	0.000717583	0.696644	0	1	3	false
PROKKA_03214	No classification	No classification	SDR family mycofactocin-dependent oxidoreductase	Sulfoacetaldehyde reductase	27 kDa		0.00028336		0.00033864	0.00029189	0.0002331	0.00028336	0.000287877	0.98431	0	1	3	false
PROKKA_04140	No classification	No classification	-	Thiol:disulfide interchange protein DsbG precursor	28 kDa		0.0004284		0.00051197	0.0002942	0.00035241	0.0004284	0.000386193	1.10929	0	1	3	false
PROKKA_04144	No classification	No classification	PQQ-dependent catabolism-associated beta-propeller protein	6-phosphogluconolactonase	42 kDa	0.00031244	0.00027791		0.00044283	0.00050894	0.00015241	0.000295175	0.00036806	0.801975	0	2	3	true
PROKKA_04091	No classification	No classification	-	Ankyrin repeats (3 copies)	18 kDa	0.00071257	0.00084512		0.00075748	0.00029018	0.0006952	0.000778845	0.000580953	1.34063	0	2	3	true
PROKKA_01096	No classification	Unknown function	-	hypothetical protein	51 kDa	0.00026839	0.00015916		0.00066571	0.001093	0.00078555	0.000213775	0.000848087	0.252067	1	2	3	true
PROKKA_01238	No classification	Unknown function	-	hypothetical protein	19 kDa	0.00094457	0.0031508		0.0057736	0.0033177	0.0038014	0.00204769	0.00429757	0.476475	0	2	3	true
PROKKA_00480	No classification	Unknown function	-	hypothetical protein	21 kDa	0.0010205	0.0014524		0.0039054	0.0016208	0.0022402	0.00123645	0.0025888	0.477615	0	2	3	true
PROKKA_04786	No classification	Unknown function	-	hypothetical protein	24 kDa	0.00070946	0.0011044		0.0022625	0.00097509	0.0015574	0.00090693	0.00159833	0.567423	0	2	3	true
PROKKA_04546	No classification	Unknown function	-	hypothetical protein	79 kDa	0.00022565	0.00020072		0.00047974	0.00041351	0.00012383	0.000213185	0.000339027	0.628815	0	2	3	true
PROKKA_01869	No classification	Unknown function	-	hypothetical protein	10 kDa	0.0027382	0.0032475		0.0053364	0.003624	0.004675	0.00299285	0.00454513	0.658474	0	2	3	true
PROKKA_01082	No classification	Unknown function	-	hypothetical protein	20 kDa	0.0014655	0.0029797		0.0051188	0.0015347	0.0030639	0.0022226	0.00323913	0.686171	0	2	3	true
PROKKA_04259	No classification	Unknown function	-	hypothetical protein	11 kDa	0.00076635	0.0027267		0.0024439	0.0021066	0.0030841	0.00174652	0.00254487	0.686293	0	2	3	true
PROKKA_03330	No classification	Unknown function	TIGR00255 family protein	hypothetical protein	32 kDa	0.00042456	0.00050354		0.00060176	0.00060514	0.00072487	0.00046405	0.000643923	0.72066	1	2	3	true
PROKKA_04331	No classification	Unknown function	-	hypothetical protein	18 kDa	0.00048643	0.0010817		0.0015512	0.00059427	0.00088982	0.000784065	0.00101176	0.774949	0	2	3	true
PROKKA_02835	No classification	No classification	extracellular protein	hypothetical protein	104 kDa	0.00069356	0.00034702		0.00032256	0.0008738	0.00076123	0.00052029	0.00065253	0.797343	0	2	3	true
PROKKA_01424	No classification	Unknown function	-	hypothetical protein	33 kDa	0.0013875	0.0010098		0.0013409	0.0010017	0.0013845	0.00119865	0.00124237	0.964812	0	2	3	true
PROKKA_02030	No classification	Unknown function	-	hypothetical protein	29 kDa	0.00074118	0.00052743		0.001103	0.0003622	0.00043387	0.000634305	0.000633023	1.00202	0	2	3	true
PROKKA_01913	No classification	Unknown function	-	hypothetical protein	37 kDa	0.00058695	0.00041767		0.00062394	0.00043024	0.00042948	0.00050231	0.000494553	1.01568	0	2	3	true
PROKKA_00123	No classification	Unknown function	-	hypothetical protein	26 kDa	0.0011282	0.00071684		0.0011993	0.00049227	0.00058968	0.00092252	0.000760417	1.21318	0	2	3	true
PROKKA_03272	No classification	Unknown function	-	hypothetical protein	39 kDa	0.0009153	0.0010177		0.00072974	0.000629	0.00066974	0.0009665	0.00067616	1.4294	1	2	3	true
PROKKA_01007	No classification	Unknown function	-	hypothetical protein	25 kDa	0.0011996	0.0018293		0.0016396	0.00052343	0.0010032	0.00151445	0.00105541	1.43494	0	2	3	true
PROKKA_04306	No classification	Unknown function	-	hypothetical protein	31 kDa	0.0029687	0.0021605		0.0011475	0.0018958	0.001876	0.0025646	0.00163977	1.564	1	2	3	true
PROKKA_05657	No classification	Unknown function	conserved hypothetical protein	hypothetical protein	17 kDa	0.0055029	0.005128		0.0033427	0.0027212	0.0019174	0.00531545	0.00266043	1.99796	1	2	3	true
PROKKA_05590	No classification	Unknown function	-	hypothetical protein	29 kDa		0.0015404	0.0023363	0.0003347	0.00096165	0.0011519	0.00193835	0.000816083	2.37519	1	2	3	true
PROKKA_04656	No classification	No classification	-	Imelysin	39 kDa	0.00080315	0.00051029		0.00060983	0.00042052	0.00041977	0.00065672	0.000483373	1.35862	0	2	3	true
PROKKA_04711	No classification	No classification	-	Indole-3-glycerol phosphate synthase	30 kDa	0.001461	0.0011696		0.0017084	0.0014279	0.0016036	0.0013153	0.00157997	0.832486	0	2	3	true
PROKKA_03570	No classification	No classification	-	Inorganic pyrophosphatase	19 kDa	0.0020889	0.0024774		0.0014803	0.0029773	0.0022078	0.00228315	0.0022218	1.02761	0	2	3	true
PROKKA_00051	No classification	No classification	-	LemA family protein	23 kDa	0.0020008	0.0010678		0.00085076	0.0015889	0.001464	0.0015343	0.00130122	1.17912	0	2	3	true
PROKKA_05765	No classification	No classification	putative NAD(P)H quinone oxidoreductase, PIG3 family	Mycocerosic acid synthase	35 kDa	0.00048936	0.00043529		0.00039015	0.00044838	0.00080566	0.000462325	0.000548063	0.843561	0	2	3	true
PROKKA_01991	No classification	No classification	leukotriene B4 12-hydroxydehydrogenase/15-oxo-prostaglandin 13-reductase	NADPH-dependent curcumin reductase	37 kDa	0.0017711	0.0010503		0.00075308	0.0013704	0.00077755	0.0014107	0.00096701	1.45883	0	2	3	true
PROKKA_03691	No classification	No classification	-	NADP-specific glutamate dehydrogenase	48 kDa	0.00082146	0.00056832		0.00029108	0.0006133	0.00053429	0.00069489	0.000479557	1.44903	0	2	3	true
PROKKA_00138	No classification	No classification	-	NAD-specific glutamate dehydrogenase	182 kDa	0.00092652	0.00011137		7.9858e-05	0.001086	0.00062298	0.000518945	0.000596279	0.870305	0	2	3	true
PROKKA_00069	No classification	No classification	mycofactocin system FadH/OYE family oxidoreductase 2	N-ethylmaleimide reductase	38 kDa	0.0017358	0.001441		0.00049204	0.00077754	0.00025402	0.0015884	0.000507867	3.12759	1	2	3	true
PROKKA_05649	No classification	No classification	-	Porin B precursor	50 kDa	0.00018132	0.00040322		0.00096376	0.00060919	0.00072973	0.00029227	0.00076756	0.380778	1	2	3	true
PROKKA_02842	No classification	No classification	-	Porin D precursor	48 kDa	0.0002782	0.00065989		0.00029573	0.00028323	0.00027141	0.000469045	0.000283457	1.65473	0	2	3	true
PROKKA_03451	No classification	No classification	-	Porin-like protein NicP precursor	48 kDa	0.00054519	0.00072742		0.00067614	0.00038853	0.00026595	0.000636305	0.00044354	1.43461	0	2	3	true
PROKKA_04692	No classification	No classification	-	PrkA AAA domain protein	74 kDa	0.00038078	0.0002258		0.00074209	0.0024035	0.00097518	0.00030329	0.00137359	0.220801	1	2	3	true
PROKKA_00486	No classification	No classification	-	putative acyl-CoA thioester hydrolase	15 kDa	0.00060622	0.0016177		0.0022555	0.00074061	0.0011089	0.00111196	0.00136834	0.812636	0	2	3	true
PROKKA_02984	No classification	No classification	TIGR02099 family protein	putative assembly protein	79 kDa	0.00049667	0.00049088		0.00017599	0.00040452	0.00016152	0.000493775	0.000247343	1.99631	0	2	3	true
PROKKA_05557	No classification	No classification	-	putative nucleotide-binding protein	18 kDa	0.00075683	0.00089761		0.0016091	0.001541	0.0014768	0.00082722	0.0015423	0.536355	1	2	3	true
PROKKA_03316	No classification	No classification	-	putative outer membrane lipoprotein	32 kDa	0.0023814	0.0023537		0.0025315	0.0024245	0.0018393	0.00236755	0.0022651	1.04523	0	2	3	true
PROKKA_03390	No classification	No classification	-	Putative uroporphyrinogen-III C-methyltransferase	40 kDa	0.00065687	0.00097382		0.00069827	0.00073562	0.00048064	0.000815345	0.000638177	1.27762	0	2	3	true
PROKKA_02782	No classification	No classification	-	Pyrimidine-specific ribonucleoside hydrolase RihA	37 kDa	0.00059381	0.00073948		0.00050499	0.00072546	0.0009559	0.000666645	0.000728783	0.914737	0	2	3	true
PROKKA_01604	No classification	No classification	membrane-bound PQQ-dependent dehydrogenase, glucose/quinate/shikimate family	Quinoprotein glucose dehydrogenase	86 kDa	0.0004541	0.00035904		0.00021454	0.00080134	0.00025843	0.00040657	0.00042477	0.957153	0	2	3	true
PROKKA_02865	No classification	No classification	-	Tetratricopeptide repeat protein	42 kDa	0.00031164	0.00055441		0.00033128	0.00019036	0.00022803	0.000433025	0.00024989	1.73286	0	2	3	true
PROKKA_03960	No classification	No classification	-	Thiol peroxidase	18 kDa	0.0058723	0.0073999		0.0085832	0.0065763	0.0062662	0.0066361	0.0071419	0.929179	0	2	3	true
PROKKA_00532	No classification	No classification	redox-active disulfide protein 1	Thiol:disulfide interchange protein DsbA precursor	23 kDa	0.00057749	0.00068491		0.0012278	0.00047034	0.00042256	0.0006312	0.0007069	0.892913	0	2	3	true
PROKKA_00576	No classification	Unknown function	-	hypothetical protein	12 kDa	0.0060173	0.010705	0.0055812	0.0099945	0.0096486	0.00743	0.0074345	0.00902437	0.823825	0	3	3	true
PROKKA_02623	No classification	Unknown function	-	hypothetical protein	28 kDa	0.0032493	0.0021677	0.0024111	0.0037995	0.0015879	0.0022587	0.00260937	0.0025487	1.0238	0	3	3	true
PROKKA_05354	No classification	Unknown function	-	hypothetical protein	9 kDa	0.0024468	0.0026117	0.0072622	0.0036414	0.0050817	0.0028646	0.0041069	0.00386257	1.06326	0	3	3	true
PROKKA_01470	No classification	Unknown function	-	hypothetical protein	23 kDa	0.00076275	0.00084809	0.0028299	0.0020271	0.00081537	0.0012558	0.00148025	0.00136609	1.08356	0	3	3	true
PROKKA_01916	No classification	Unknown function	-	hypothetical protein	26 kDa	0.0023993	0.0018293	0.003815	0.0032792	0.0012562	0.001881	0.0026812	0.0021388	1.2536	0	3	3	true
PROKKA_04556	No classification	Unknown function	-	hypothetical protein	53 kDa	0.0011418	0.0010882	0.0018156	0.00078029	0.001096	0.0008355	0.00134853	0.00090393	1.49186	0	3	3	true
PROKKA_00323	No classification	Unknown function	-	hypothetical protein	9 kDa	0.006212	0.013601	0.035457	0.0091432	0.011384	0.015734	0.0184233	0.0120871	1.52422	0	3	3	true
PROKKA_04803	No classification	Unknown function	-	hypothetical protein	15 kDa	0.0017284	0.0035873	0.0085499	0.0030621	0.0014077	0.001897	0.00462187	0.00212227	2.1778	0	3	3	true
PROKKA_04468	No classification	No classification	-	Putative reductase/y4119/YP_4011	43 kDa	0.0014323	0.0014561	0.0015183	0.0010876	0.0014374	0.00097319	0.0014689	0.00116606	1.25971	0	3	3	true
PROKKA_05645	No classification	No classification	-	putative sugar-binding periplasmic protein precursor	46 kDa	0.0030368	0.0043895	0.0049292	0.010693	0.012057	0.010832	0.0041185	0.011194	0.36792	1	3	3	true
PROKKA_03836	No classification	No classification	GTP-binding protein YchF	Ribosome-binding ATPase YchF	40 kDa	0.0011097	0.00088841	0.0032938	0.00047187	0.0011524	0.00073082	0.00176397	0.00078503	2.24701	0	3	3	true
PROKKA_02267	Protein fate	Degradation of proteins, peptides, and glycopeptides	ATP-dependent Clp protease ATP-binding subunit ClpA	ATPase family associated with various cellular activities (AAA)	32 kDa	0.00043363						0.00043363			0	1	off	false
PROKKA_02653	Protein fate	Degradation of proteins, peptides, and glycopeptides	ATP-dependent Clp protease ATP-binding subunit ClpA	ATP-dependent Clp protease ATP-binding subunit ClpA	83 kDa	0.00016118						0.00016118			0	1	off	false
PROKKA_03062	Protein fate	Degradation of proteins, peptides, and glycopeptides	ATP-dependent protease HslVU, peptidase subunit	ATP-dependent protease subunit HslV	19 kDa		0.00041055					0.00041055			0	1	off	false
PROKKA_03031	Protein fate	Degradation of proteins, peptides, and glycopeptides	prolyl aminopeptidase	Proline iminopeptidase	37 kDa	0.0002515						0.0002515			0	1	off	false
PROKKA_03900	Protein fate	Degradation of proteins, peptides, and glycopeptides	-	Protease HtpX	32 kDa		0.00024494					0.00024494			0	1	off	false
PROKKA_01103	Protein fate	Protein and peptide secretion and trafficking	type VI secretion system peptidoglycan-associated domain	putative lipoprotein YiaD precursor	27 kDa		0.00028226					0.00028226			0	1	off	false
PROKKA_04534	Protein fate	Protein and peptide secretion and trafficking	type I secretion membrane fusion protein, HlyD family	Type I secretion system membrane fusion protein PrsE	50 kDa		0.00031831					0.00031831			0	1	off	false
PROKKA_01230	Protein fate	Degradation of proteins, peptides, and glycopeptides	hydrolase, peptidase M42 family	Glutamyl aminopeptidase	43 kDa	0.00061853	0.00027509					0.00044681		on T	0	2	off	false
PROKKA_01048	Protein fate	Degradation of proteins, peptides, and glycopeptides	-	peptidase PmbA	48 kDa	0.0007253	0.00032258					0.00052394		on T	0	2	off	false
PROKKA_04376	Protein fate	Degradation of proteins, peptides, and glycopeptides	signal peptide peptidase SppA, 67K type	putative protease SohB	38 kDa	0.00023822	0.0002119					0.00022506		on T	0	2	off	false
PROKKA_02871	Protein fate	Protein folding and stabilization	-	33 kDa chaperonin	33 kDa				0.00028784				0.00028784		0	off	1	false
PROKKA_03877	Protein fate	Protein folding and stabilization	trigger factor	FKBP-type 16 kDa peptidyl-prolyl cis-trans isomerase	16 kDa				0.00057568				0.00057568		0	off	1	false
PROKKA_05767	Protein fate	Degradation of proteins, peptides, and glycopeptides	intracellular protease, PfpI family	General stress protein 18	24 kDa					0.00022054			0.00022054		0	off	1	false
PROKKA_03303	Protein fate	Protein and peptide secretion and trafficking	type VI secretion protein, VC_A0107 family	hypothetical protein	18 kDa						0.00053071		0.00053071		0	off	1	false
PROKKA_03309	Protein fate	Protein and peptide secretion and trafficking	type VI secretion protein IcmF	Intracellular multiplication and human macrophage-killing	129 kDa					6.3835e-05			6.3835e-05		0	off	1	false
PROKKA_03179	Protein fate	Degradation of proteins, peptides, and glycopeptides	HflC protein	Modulator of FtsH protease HflC	33 kDa					0.00051689			0.00051689		0	off	1	false
PROKKA_02435	Protein fate	Degradation of proteins, peptides, and glycopeptides	-	peptidase PmbA	48 kDa					0.00011329			0.00011329		0	off	1	false
PROKKA_03296	Protein fate	Protein and peptide secretion and trafficking	type VI secretion system Vgr family protein	Phage-related baseplate assembly protein	73 kDa					7.6694e-05			7.6694e-05		0	off	1	false
PROKKA_01489	Protein fate	Protein and peptide secretion and trafficking	protein-export membrane protein SecF	preprotein translocase subunit SecF	33 kDa					0.00048968			0.00048968		0	off	1	false
PROKKA_04740	Protein fate	Protein modification and repair	protein-L-isoaspartate O-methyltransferase	Protein-L-isoaspartate O-methyltransferase	25 kDa				0.00038379				0.00038379		0	off	1	false
PROKKA_05353	Protein fate	Degradation of proteins, peptides, and glycopeptides	-	putative L,D-transpeptidase YbiS precursor	34 kDa					0.00015458			0.00015458		0	off	1	false
PROKKA_05085	Protein fate	Degradation of proteins, peptides, and glycopeptides	signal peptide peptidase SppA, 36K type	Putative signal peptide peptidase SppA	36 kDa						0.00018177		0.00018177		0	off	1	false
PROKKA_03076	Protein fate	Protein and peptide secretion and trafficking	putative secretion ATPase, PEP-CTERM locus subfamily	hypothetical protein	54 kDa		0.00013816		0.00033022			0.00013816	0.00033022	0.418388	0	1	1	false
PROKKA_02276	Protein fate	Degradation of proteins, peptides, and glycopeptides	-	Protease 2	76 kDa	0.00023892				0.00018243		0.00023892	0.00018243	1.30965	0	1	1	false
PROKKA_01479	Protein fate	Protein folding and stabilization	Fe-S protein assembly chaperone HscA	Chaperone protein HscA	66 kDa	0.00052409	0.00017482			0.00028012		0.000349455	0.00028012	1.24752	0	2	1	false
PROKKA_00118	Protein fate	Protein and peptide secretion and trafficking	type VI secretion system peptidoglycan-associated domain	putative lipoprotein YiaD precursor	40 kDa	0.00063629	0.00047165			0.00025912		0.00055397	0.00025912	2.13789	0	2	1	false
PROKKA_03301	Protein fate	Protein and peptide secretion and trafficking	type VI secretion system effector, Hcp1 family	hypothetical protein	18 kDa					0.0003063	0.00036691		0.000336605	on UT	0	off	2	false
PROKKA_04770	Protein fate	Protein modification and repair	methionine aminopeptidase, type I	Methionine aminopeptidase	29 kDa					0.00047713	0.00068584		0.000581485	on UT	0	off	2	false
PROKKA_00900	Protein fate	Degradation of proteins, peptides, and glycopeptides	peptidase, ArgE/DapE family	putative succinyl-diaminopimelate desuccinylase	47 kDa		0.00017042		0.00081465	0.00040961		0.00017042	0.00061213	0.278405	0	1	2	false
PROKKA_02677	Protein fate	Protein folding and stabilization	periplasmic protein thiol:disulfide oxidoreductases, DsbE subfamily	Thiol-disulfide oxidoreductase ResA	17 kDa		0.00094454			0.00097296	0.00097124	0.00094454	0.0009721	0.971649	0	1	2	false
PROKKA_04617	Protein fate	Protein modification and repair	methionine aminopeptidase, type I	Aminopeptidase	66 kDa	0.00026988	0.00018004			0.00032971	0.00014811	0.00022496	0.00023891	0.94161	0	2	2	true
PROKKA_03061	Protein fate	Protein folding and stabilization	ATP-dependent protease HslVU, ATPase subunit	ATP-dependent protease ATPase subunit HslU	50 kDa	0.00054764	0.00024356			0.00044603	0.00053429	0.0003956	0.00049016	0.807083	0	2	2	true
PROKKA_02545	Protein fate	Degradation of proteins, peptides, and glycopeptides	endopeptidase La	Lon protease	89 kDa	0.00035629	9.0548e-05			0.00037309	0.00037243	0.000223419	0.00037276	0.599364	1	2	2	true
PROKKA_03696	Protein fate	Degradation of proteins, peptides, and glycopeptides	putative ATP-dependent protease	Lon protease	89 kDa	0.00055023	0.00017797			0.00054999	7.3202e-05	0.0003641	0.000311596	1.1685	0	2	2	true
PROKKA_02348	Protein fate	Protein folding and stabilization	peptidase Do	putative periplasmic serine endoprotease DegP-like precursor	51 kDa	0.00042486	0.0004535		0.00036131	0.00015571		0.00043918	0.00025851	1.69889	1	2	2	true
PROKKA_02401	Protein fate	Protein and peptide secretion and trafficking	type I secretion C-terminal target domain (VC_A0849 subclass)	Leukotoxin	156 kDa	0.00053163	0.00049653	0.00059172		0.00027603	0.0001167	0.00053996	0.000196365	2.74978	1	3	2	true
PROKKA_02543	Protein fate	Degradation of proteins, peptides, and glycopeptides	ATP-dependent Clp endopeptidase, proteolytic subunit ClpP	ATP-dependent Clp protease proteolytic subunit	23 kDa				0.00040925	0.00058793	0.00042256		0.000473247	on UT	0	off	3	false
PROKKA_05384	Protein fate	Degradation of proteins, peptides, and glycopeptides	peptidase, ArgE/DapE family	Carboxypeptidase G2 precursor	44 kDa				0.00021113	0.00018198	0.00021799		0.0002037	on UT	0	off	3	false
PROKKA_01697	Protein fate	Protein and peptide secretion and trafficking	outer membrane autotransporter barrel domain	Extracellular serine protease precursor	132 kDa				0.00024334	0.00013983	0.00011965		0.000167607	on UT	0	off	3	false
PROKKA_03117	Protein fate	Protein modification and repair	peptide-methionine (S)-S-oxide reductase	Peptide methionine sulfoxide reductase MsrA	24 kDa				0.00040164	0.0002308	0.00027646		0.000302967	on UT	0	off	3	false
PROKKA_03302	Protein fate	Protein and peptide secretion and trafficking	type VI secretion protein, EvpB/VC_A0108 family	hypothetical protein	56 kDa	0.00016312			0.0001734	0.00044838	0.00041775	0.00016312	0.00034651	0.470751	0	1	3	false
PROKKA_02658	Protein fate	Protein and peptide secretion and trafficking	outer membrane lipoprotein carrier protein LolA	Outer-membrane lipoprotein carrier protein precursor	23 kDa		0.00069814		0.00062574	0.00071915	0.00086144	0.00069814	0.000735443	0.949278	0	1	3	false
PROKKA_03842	Protein fate	Protein and peptide secretion and trafficking	outer membrane lipoprotein LolB	Outer-membrane lipoprotein LolB precursor	23 kDa		0.00088119		0.00063185	0.00048411	0.00043492	0.00088119	0.00051696	1.70456	0	1	3	false
PROKKA_01205	Protein fate	Protein and peptide secretion and trafficking	type VI secretion system peptidoglycan-associated domain	Peptidoglycan-binding protein ArfA	17 kDa		0.0011151		0.00053304	0.00061261	0.00073382	0.0011151	0.00062649	1.77992	0	1	3	false
PROKKA_01952	Protein fate	Protein folding and stabilization	-	Peptidyl-prolyl cis-trans isomerase A precursor	20 kDa		0.0011592		0.00092356	0.00026535	0.00063572	0.0011592	0.00060821	1.90592	0	1	3	false
PROKKA_04981	Protein fate	Protein and peptide secretion and trafficking	signal recognition particle protein	Signal recognition particle protein	49 kDa		0.00031553		0.0006599	0.00021669	0.00045423	0.00031553	0.000443607	0.711283	0	1	3	false
PROKKA_04666	Protein fate	Protein folding and stabilization	-	10 kDa chaperonin	10 kDa		0.0033179	0.0061507	0.0039652	0.0010127	0.0036392	0.0047343	0.00287237	1.64822	0	2	3	true
PROKKA_02544	Protein fate	Protein folding and stabilization	ATP-dependent Clp protease, ATP-binding subunit ClpX	ATP-dependent Clp protease ATP-binding subunit ClpX	47 kDa	0.0013317	0.00025383		0.00020223	0.00034863	0.00062641	0.000792765	0.000392423	2.02018	0	2	3	true
PROKKA_00281	Protein fate	Degradation of proteins, peptides, and glycopeptides	putative dipeptidase	Beta-Ala-Xaa dipeptidase	62 kDa	0.0012627	0.0016224		0.0014914	0.0011141	0.00071861	0.00144255	0.00110804	1.3019	0	2	3	true
PROKKA_02993	Protein fate	Degradation of proteins, peptides, and glycopeptides	putative carboxyl-terminal-processing protease, deltaproteobacterial	Carboxy-terminal processing protease CtpB precursor	46 kDa	0.00055639	0.00049491		0.00029573	0.00039652	0.00027141	0.00052565	0.00032122	1.63642	1	2	3	true
PROKKA_01623	Protein fate	Degradation of proteins, peptides, and glycopeptides	-	Cytosol aminopeptidase	52 kDa	0.00024567	0.00014568		0.00043525	0.00080034	0.00071903	0.000195675	0.00065154	0.300327	0	2	3	true
PROKKA_04708	Protein fate	Protein and peptide secretion and trafficking	outer membrane autotransporter barrel domain	Esterase EstA precursor	68 kDa	0.00012693	0.0001129		0.00013493	7.7533e-05	0.00013931	0.000119915	0.000117258	1.02266	0	2	3	true
PROKKA_04925	Protein fate	Protein folding and stabilization	-	FKBP-type 22 kDa peptidyl-prolyl cis-trans isomerase	22 kDa	0.0011888	0.0015861		0.0021062	0.00096822	0.0013048	0.00138745	0.00145974	0.950477	0	2	3	true
PROKKA_04332	Protein fate	Degradation of proteins, peptides, and glycopeptides	intracellular protease, PfpI family	General stress protein 18	19 kDa	0.0010918	0.00077696		0.00069639	0.00053356	0.00063914	0.00093438	0.00062303	1.49974	0	2	3	true
PROKKA_04323	Protein fate	Protein folding and stabilization	peptidase Do	hypothetical protein	29 kDa	0.00060396	0.00080585		0.00080253	0.0002767	0.00044193	0.000704905	0.000507053	1.3902	0	2	3	true
PROKKA_00615	Protein fate	Protein and peptide secretion and trafficking	membrane protein insertase, YidC/Oxa1 family, N-terminal domain	Membrane protein insertase YidC	62 kDa	0.00094289	0.00070967		0.0003855	0.00070887	0.00026536	0.00082628	0.000453243	1.82304	0	2	3	true
PROKKA_01089	Protein fate	Degradation of proteins, peptides, and glycopeptides	-	Metalloprotease LoiP precursor	29 kDa	0.0016426	0.0014611		0.00079368	0.00072972	0.00087411	0.00155185	0.00079917	1.94183	1	2	3	true
PROKKA_03178	Protein fate	Degradation of proteins, peptides, and glycopeptides	HflK protein	Modulator of FtsH protease HflK	43 kDa	0.00031164	0.0003696		0.00033128	0.00044418	0.00030404	0.00034062	0.000359833	0.946605	0	2	3	true
PROKKA_00566	Protein fate	Degradation of proteins, peptides, and glycopeptides	oligoendopeptidase, M3 family	Oligopeptidase A	75 kDa	0.0012488	0.00068766		0.00056894	0.0011988	0.0009573	0.00096823	0.000908347	1.06593	0	2	3	true
PROKKA_04532	Protein fate	Protein and peptide secretion and trafficking	type I secretion outer membrane protein, TolC family	Outer membrane efflux protein BepC precursor	50 kDa	0.0004503	0.00056076		0.0002872	0.00027506	0.00019769	0.00050553	0.000253317	1.99564	1	2	3	true
PROKKA_00426	Protein fate	Degradation of proteins, peptides, and glycopeptides	-	Peptidase M16 inactive domain protein	53 kDa	0.00065511	0.00065556		0.0003482	0.00045019	0.00035951	0.000655335	0.000385967	1.69791	1	2	3	true
PROKKA_02598	Protein fate	Protein folding and stabilization	-	Peptidyl-prolyl cis-trans isomerase cyp18	18 kDa	0.0017025	0.0028124		0.0046537	0.0028228	0.004805	0.00225745	0.00409383	0.551427	0	2	3	true
PROKKA_04760	Protein fate	Protein folding and stabilization	-	periplasmic chaperone	19 kDa	0.00097285	0.0028124		0.0041367	0.0013371	0.0024915	0.00189262	0.0026551	0.712826	0	2	3	true
PROKKA_05551	Protein fate	Protein and peptide secretion and trafficking	preprotein translocase, SecA subunit	preprotein translocase subunit SecA	103 kDa	0.00075794	0.00015863		0.00023697	0.0007081	0.00052197	0.000458285	0.000489013	0.937163	0	2	3	true
PROKKA_01490	Protein fate	Protein and peptide secretion and trafficking	protein-export membrane protein SecD	preprotein translocase subunit SecD	67 kDa	0.0007836	0.00046468		0.00013883	0.00075788	0.00043003	0.00062414	0.000442247	1.41129	0	2	3	true
PROKKA_01491	Protein fate	Protein and peptide secretion and trafficking	preprotein translocase, YajC subunit	preprotein translocase subunit YajC	12 kDa	0.0029012	0.0048387		0.002313	0.0017722	0.0026536	0.00386995	0.00224627	1.72284	0	2	3	true
PROKKA_02998	Protein fate	Protein and peptide secretion and trafficking	protein-export chaperone SecB	Protein-export protein SecB	18 kDa	0.0015327	0.0015906		0.0027155	0.0021846	0.0013084	0.00156165	0.0020695	0.754603	0	2	3	true
PROKKA_02089	Protein fate	Protein and peptide secretion and trafficking	type VI secretion system peptidoglycan-associated domain	putative lipoprotein YiaD precursor	30 kDa	0.001053	0.00066905		0.00031982	0.00036756	0.00033022	0.000861025	0.0003392	2.5384	1	2	3	true
PROKKA_01619	Protein fate	Protein and peptide secretion and trafficking	signal peptidase I	Signal peptidase I	32 kDa	0.0011441	0.0008905		0.00045609	0.00078625	0.00062788	0.0010173	0.000623407	1.63184	0	2	3	true
PROKKA_00428	Protein fate	Protein and peptide secretion and trafficking	signal recognition particle-docking protein FtsY	Signal recognition particle receptor FtsY	50 kDa	0.00061012	0.00046518		0.00018531	0.00042593	0.00025511	0.00053765	0.000288783	1.86178	0	2	3	true
PROKKA_04665	Protein fate	Protein folding and stabilization	chaperonin GroL	60 kDa chaperonin	57 kDa	0.010821	0.0084388	0.010999	0.0065395	0.0091002	0.0053691	0.0100863	0.00700293	1.44029	0	3	3	true
PROKKA_04162	Protein fate	Degradation of proteins, peptides, and glycopeptides	aminopeptidase N	Aminopeptidase N	99 kDa	0.0013309	0.0005307	0.00068109	0.00034151	0.0012896	0.0011418	0.000847563	0.000924303	0.916975	0	3	3	true
PROKKA_03889	Protein fate	Protein folding and stabilization	ATP-dependent chaperone protein ClpB	Chaperone protein ClpB	95 kDa	0.0023305	0.00054997	0.0017645	0.00040446	0.0017141	0.0015312	0.00154832	0.00121659	1.27268	0	3	3	true
PROKKA_03724	Protein fate	Protein folding and stabilization	chaperone protein DnaK	Chaperone protein DnaK	68 kDa	0.0094857	0.0054363	0.010393	0.0034514	0.0078943	0.0047514	0.00843833	0.0053657	1.57264	0	3	3	true
PROKKA_00320	Protein fate	Protein folding and stabilization	-	Chaperone protein HtpG	71 kDa	0.0041642	0.003875	0.0047537	0.0024517	0.0029741	0.0016407	0.0042643	0.0023555	1.81036	1	3	3	true
PROKKA_04587	Protein fate	Protein folding and stabilization	peptidyl-prolyl isomerase, gliding motility-associated	FKBP-type 22 kDa peptidyl-prolyl cis-trans isomerase	26 kDa	0.0041277	0.0038185	0.0024503	0.0042123	0.0034291	0.0037452	0.0034655	0.00379553	0.913047	0	3	3	true
PROKKA_03723	Protein fate	Protein folding and stabilization	-	heat shock protein GrpE	21 kDa	0.0013102	0.0013597	0.0032407	0.0013928	0.0014673	0.0019174	0.0019702	0.0015925	1.23717	0	3	3	true
PROKKA_04761	Protein fate	Protein and peptide secretion and trafficking	outer membrane protein assembly complex, YaeT protein	Outer membrane protein assembly factor BamA precursor	88 kDa	0.00097071	0.0009089	0.0007582	0.00032586	0.00053054	0.00029907	0.00087927	0.000385157	2.28289	1	3	3	true
PROKKA_01469	Protein fate	Protein and peptide secretion and trafficking	outer membrane assembly lipoprotein YfgL	Outer membrane protein assembly factor BamB precursor	43 kDa	0.001418	0.0018019	0.0030063	0.0010767	0.00092808	0.00066703	0.0020754	0.000890603	2.33033	1	3	3	true
PROKKA_03886	Protein fate	Protein and peptide secretion and trafficking	outer membrane assembly lipoprotein YfiO	Outer membrane protein assembly factor BamD precursor	39 kDa	0.0013102	0.0011654	0.0017676	0.0013928	0.00080034	0.0009587	0.0014144	0.00105061	1.34626	0	3	3	true
PROKKA_02779	Protein fate	Degradation of proteins, peptides, and glycopeptides	-	Peptidase inhibitor I78 family protein	11 kDa	0.0019159	0.0017042	0.0056865	0.001222	0.0011703	0.0028038	0.0031022	0.00173203	1.79107	0	3	3	true
PROKKA_04593	Protein fate	Degradation of proteins, peptides, and glycopeptides	C-terminal processing peptidase	Tail-specific protease precursor	78 kDa	0.0012894	0.00078201	0.0021745	0.00087225	0.0010741	0.00081483	0.0014153	0.000920393	1.53772	0	3	3	true
PROKKA_02542	Protein fate	Protein folding and stabilization	trigger factor	Trigger factor	48 kDa	0.00708	0.0064634	0.011751	0.0043572	0.0052353	0.0077708	0.00843147	0.00578777	1.45677	0	3	3	true
PROKKA_05624	Protein synthesis	tRNA and rRNA base modification	pseudouridine synthase	Ribosomal large subunit pseudouridine synthase B	45 kDa	0.00020207						0.00020207			0	1	off	false
PROKKA_04696	Protein synthesis	tRNA and rRNA base modification	ribosomal RNA small subunit methyltransferase A	Ribosomal RNA small subunit methyltransferase A	30 kDa	0.00030086						0.00030086			0	1	off	false
PROKKA_01492	Protein synthesis	tRNA and rRNA base modification	tRNA-guanine transglycosylase	Queuine tRNA-ribosyltransferase	41 kDa	0.0003258	0.0002898					0.0003078		on T	0	2	off	false
PROKKA_03188	Protein synthesis	tRNA and rRNA base modification	RNA methyltransferase, TrmH family, group 3	23S rRNA (guanosine-2'-O-)-methyltransferase RlmB	27 kDa					0.00019613			0.00019613		0	off	1	false
PROKKA_03872	Protein synthesis	Ribosomal proteins: synthesis and modification	ribosomal protein bS20	30S ribosomal protein S20	10 kDa						0.00096912		0.00096912		0	off	1	false
PROKKA_05082	Protein synthesis	Ribosomal proteins: synthesis and modification	ribosomal protein bL32	50S ribosomal protein L32	7 kDa						0.00099066		0.00099066		0	off	1	false
PROKKA_03845	Protein synthesis	Translation factors	peptide chain release factor 1	Peptide chain release factor 1	40 kDa					0.00013784			0.00013784		0	off	1	false
PROKKA_03837	Protein synthesis	Other	aminoacyl-tRNA hydrolase	Peptidyl-tRNA hydrolase	21 kDa					0.00025578			0.00025578		0	off	1	false
PROKKA_04672	Protein synthesis	tRNA aminoacylation	proline--tRNA ligase	Proline--tRNA ligase	63 kDa					0.00052141			0.00052141		0	off	1	false
PROKKA_04279	Protein synthesis	Ribosomal proteins: synthesis and modification	ribosomal-protein-alanine acetyltransferase	putative acetyltransferase	18 kDa						0.00036466		0.00036466		0	off	1	false
PROKKA_04811	Protein synthesis	Translation factors	peptide chain release factor 2	Peptide chain release factor 2	45 kDa		0.00017975			0.00012344		0.00017975	0.00012344	1.45617	0	1	1	false
PROKKA_02772	Protein synthesis	tRNA aminoacylation	phenylalanine--tRNA ligase, alpha subunit	Phenylalanine--tRNA ligase alpha subunit	38 kDa	0.00048067	0.00042756			0.00022021		0.000454115	0.00022021	2.06219	0	2	1	false
PROKKA_04982	Protein synthesis	Ribosomal proteins: synthesis and modification	ribosomal protein bS16	30S ribosomal protein S16	9 kDa					0.00089677	0.0025065		0.00170163	on UT	0	off	2	false
PROKKA_03573	Protein synthesis	Ribosomal proteins: synthesis and modification	ribosomal-protein-alanine acetyltransferase	Acetyltransferase (GNAT) family protein	18 kDa					0.00032646	0.00058658		0.00045652	on UT	0	off	2	false
PROKKA_01468	Protein synthesis	Other	ribosome-associated GTPase EngA	GTPase Der	55 kDa					0.00010147	0.00018233		0.0001419	on UT	0	off	2	false
PROKKA_02661	Protein synthesis	tRNA aminoacylation	serine--tRNA ligase	Serine--tRNA ligase	47 kDa					0.0002912	0.00027906		0.00028513	on UT	0	off	2	false
PROKKA_00035	Protein synthesis	Ribosomal proteins: synthesis and modification	ribosomal protein uS14	30S ribosomal protein S14	11 kDa	0.0052279			0.0047024	0.0024565		0.0052279	0.00357945	1.46053	0	1	2	false
PROKKA_00605	Protein synthesis	tRNA aminoacylation	glycine--tRNA ligase, beta subunit	Glycine--tRNA ligase beta subunit	75 kDa	0.00047505				0.00072546	0.0005214	0.00047505	0.00062343	0.761994	0	1	2	false
PROKKA_00993	Protein synthesis	Translation factors	peptide chain release factor 3	Peptide chain release factor 3	60 kDa	0.00069364			0.00024579		0.00011279	0.00069364	0.00017929	3.86882	0	1	2	false
PROKKA_00425	Protein synthesis	tRNA and rRNA base modification	16S rRNA (guanine(966)-N(2))-methyltransferase RsmD	Ribosomal RNA small subunit methyltransferase D	23 kDa		0.00070495			0.00060514	0.00028995	0.00070495	0.000447545	1.57515	0	1	2	false
PROKKA_02776	Protein synthesis	tRNA aminoacylation	threonine--tRNA ligase	Threonine--tRNA ligase	73 kDa	0.00012693				0.00050396	0.00041794	0.00012693	0.00046095	0.275366	0	1	2	false
PROKKA_02642	Protein synthesis	Ribosomal proteins: synthesis and modification	-	50S ribosomal protein L16 arginine hydroxylase	44 kDa	0.00041873	0.00027935			0.00051156	0.00015319	0.00034904	0.000332375	1.05014	0	2	2	true
PROKKA_02600	Protein synthesis	tRNA aminoacylation	cysteine--tRNA ligase	Cysteine--tRNA ligase	51 kDa	0.00035319	0.00023562			0.00032362	0.00051687	0.000294405	0.000420245	0.700556	0	2	2	true
PROKKA_01328	Protein synthesis	tRNA aminoacylation	glutamate--tRNA ligase	Glutamate--tRNA ligase	56 kDa	0.00057671	0.00021985			0.00050326	0.00030142	0.00039828	0.00040234	0.989909	0	2	2	true
PROKKA_01037	Protein synthesis	tRNA aminoacylation	aspartyl/glutamyl-tRNA(Asn/Gln) amidotransferase, A subunit	Glutamyl-tRNA(Gln) amidotransferase subunit A	52 kDa	0.00042046		0.001248		0.00046231	0.00043072	0.00083423	0.000446515	1.86831	0	2	2	true
PROKKA_00604	Protein synthesis	tRNA aminoacylation	glycine--tRNA ligase, alpha subunit	Glycine--tRNA ligase alpha subunit	36 kDa	0.00076877	0.00034191			0.0004696	0.00046877	0.00055534	0.000469185	1.18363	0	2	2	true
PROKKA_01471	Protein synthesis	tRNA aminoacylation	histidine--tRNA ligase	Histidine--tRNA ligase	48 kDa	0.0011361	0.00067373			0.00092534	0.00055422	0.000904915	0.00073978	1.22322	0	2	2	true
PROKKA_03608	Protein synthesis	tRNA aminoacylation	leucine--tRNA ligase	Leucine--tRNA ligase	97 kDa	0.00079549	0.00016649			0.00057167	0.00058207	0.00048099	0.00057687	0.833793	0	2	2	true
PROKKA_00598	Protein synthesis	tRNA aminoacylation	methionyl-tRNA formyltransferase	Methionyl-tRNA formyltransferase	34 kDa	0.00076877	0.00034191		0.00040861		0.00018751	0.00055534	0.00029806	1.86318	0	2	2	true
PROKKA_03593	Protein synthesis	Translation factors	ribosome silencing factor	Ribosomal silencing factor RsfS	18 kDa	0.00049532	0.0011015		0.0010531	0.00045385		0.00079841	0.000753475	1.05964	0	2	2	true
PROKKA_03741	Protein synthesis	tRNA and rRNA base modification	tRNA pseudouridine(55) synthase	tRNA pseudouridine synthase B	33 kDa	0.00079902	0.00035536		0.00028312	0.00024404		0.00057719	0.00026358	2.18981	1	2	2	true
PROKKA_01626	Protein synthesis	tRNA aminoacylation	valine--tRNA ligase	Valine--tRNA ligase	107 kDa	0.00051413	7.6221e-05			0.00086366	0.00028215	0.000295176	0.000572905	0.515226	0	2	2	true
PROKKA_04725	Protein synthesis	tRNA aminoacylation	tyrosine--tRNA ligase	Tyrosine--tRNA ligase	44 kDa	0.0010129	0.00063068	0.0030063		0.00080433	0.00088937	0.00154996	0.00084685	1.83027	0	3	2	true
PROKKA_00026	Protein synthesis	Ribosomal proteins: synthesis and modification	ribosomal protein uS19	30S ribosomal protein S19	10 kDa				0.00094893	0.0010906	0.00097977		0.00100643	on UT	0	off	3	false
PROKKA_00031	Protein synthesis	Ribosomal proteins: synthesis and modification	ribosomal protein uS17	30S ribosomal protein S17	10 kDa			0.013699	0.0039251	0.0036652	0.003715	0.013699	0.00376843	3.6352	0	1	3	false
PROKKA_04766	Protein synthesis	Translation factors	ribosome recycling factor	Ribosome-recycling factor	20 kDa		0.00039058		0.00093354	0.00040233	0.0003213	0.00039058	0.00055239	0.707073	0	1	3	false
PROKKA_00044	Protein synthesis	Ribosomal proteins: synthesis and modification	ribosomal protein uS11	30S ribosomal protein S11	14 kDa	0.0040931	0.0025206		0.0036817	0.0042313	0.002995	0.00330685	0.003636	0.909475	0	2	3	true
PROKKA_00043	Protein synthesis	Ribosomal proteins: synthesis and modification	ribosomal protein uS13	30S ribosomal protein S13	13 kDa	0.0061958	0.0045926		0.003659	0.0031539	0.0047854	0.0053942	0.0038661	1.39526	0	2	3	true
PROKKA_03190	Protein synthesis	Ribosomal proteins: synthesis and modification	ribosomal protein bS18	30S ribosomal protein S18	9 kDa	0.0032066	0.0019015		0.0062492	0.0022852	0.0039105	0.00255405	0.0041483	0.615686	0	2	3	true
PROKKA_00028	Protein synthesis	Ribosomal proteins: synthesis and modification	ribosomal protein uS3	30S ribosomal protein S3	26 kDa	0.0017814	0.0011092		0.0020831	0.0021764	0.0033891	0.0014453	0.00254953	0.566888	1	2	3	true
PROKKA_00036	Protein synthesis	Ribosomal proteins: synthesis and modification	ribosomal protein uS8	30S ribosomal protein S8	14 kDa	0.0028119	0.0022233		0.0029891	0.0019085	0.0022861	0.0025176	0.00239457	1.05138	0	2	3	true
PROKKA_01020	Protein synthesis	Ribosomal proteins: synthesis and modification	ribosomal protein uS9	30S ribosomal protein S9	15 kDa	0.00062487	0.0025012		0.0023249	0.0015268	0.0025148	0.00156303	0.00212217	0.736528	0	2	3	true
PROKKA_00029	Protein synthesis	Ribosomal proteins: synthesis and modification	ribosomal protein uL16	50S ribosomal protein L16	15 kDa	0.0014824	0.0021097		0.004097	0.0023543	0.0026032	0.00179605	0.00301817	0.59508	1	2	3	true
PROKKA_00047	Protein synthesis	Ribosomal proteins: synthesis and modification	ribosomal protein bL17	50S ribosomal protein L17	14 kDa	0.011106	0.0087499		0.0087702	0.0075595	0.0067334	0.00992795	0.0076877	1.29141	0	2	3	true
PROKKA_02773	Protein synthesis	Ribosomal proteins: synthesis and modification	ribosomal protein bL20	50S ribosomal protein L20	13 kDa	0.0013768	0.0012247		0.0014636	0.0010513	0.0015112	0.00130075	0.00134203	0.969238	0	2	3	true
PROKKA_04929	Protein synthesis	Ribosomal proteins: synthesis and modification	ribosomal protein bL21	50S ribosomal protein L21	12 kDa	0.0019527	0.0090322		0.0041516	0.0057255	0.012002	0.00549245	0.00729303	0.753109	0	2	3	true
PROKKA_03342	Protein synthesis	Ribosomal proteins: synthesis and modification	ribosomal protein bL28	50S ribosomal protein L28	9 kDa	0.0052749	0.004692		0.006168	0.0061221	0.0069475	0.00498345	0.00641253	0.777142	1	2	3	true
PROKKA_03192	Protein synthesis	Ribosomal proteins: synthesis and modification	ribosomal protein bL9	50S ribosomal protein L9	15 kDa	0.0052143	0.011473		0.007585	0.0025146	0.0028113	0.00834365	0.00430363	1.93875	0	2	3	true
PROKKA_01889	Protein synthesis	tRNA aminoacylation	alanine--tRNA ligase	Alanine--tRNA ligase	94 kDa	0.000885		0.0013825	9.9028e-05	0.0010527	0.00078389	0.00113375	0.000645206	1.75719	0	2	3	true
PROKKA_05231	Protein synthesis	tRNA aminoacylation	methionyl-tRNA formyltransferase	Bifunctional polymyxin resistance protein ArnA	74 kDa	0.0010415	0.00027246		0.00019537	0.00041164	0.00035861	0.00065698	0.000321873	2.04111	0	2	3	true
PROKKA_02599	Protein synthesis	tRNA aminoacylation	glutamine--tRNA ligase	Glutamine--tRNA ligase	65 kDa	0.0017223	0.00089364		0.0004577	0.0013589	0.00047258	0.00130797	0.00076306	1.71411	0	2	3	true
PROKKA_04931	Protein synthesis	Other	Obg family GTPase CgtA	GTPase Obg	45 kDa	0.00069857	0.00062138		0.00021217	0.00097535	0.00058417	0.000659975	0.000590563	1.11753	0	2	3	true
PROKKA_03875	Protein synthesis	tRNA aminoacylation	isoleucine--tRNA ligase	Isoleucine--tRNA ligase	106 kDa	0.00068915	0.00015325		0.00018314	0.00094717	0.00056729	0.0004212	0.000565867	0.744345	0	2	3	true
PROKKA_04810	Protein synthesis	tRNA aminoacylation	lysine--tRNA ligase	Lysine--tRNA ligase, heat inducible	57 kDa	0.0030869	0.0031071		0.0016407	0.0019848	0.0016049	0.003097	0.00174347	1.77635	1	2	3	true
PROKKA_04029	Protein synthesis	tRNA aminoacylation	methionine--tRNA ligase	Methionine--tRNA ligase	76 kDa	0.00089202	0.00042318		0.00037929	0.00065387	0.00060919	0.0006576	0.00054745	1.20121	0	2	3	true
PROKKA_01111	Protein synthesis	tRNA and rRNA base modification	16S rRNA (cytosine(1402)-N(4))-methyltransferase	Ribosomal RNA small subunit methyltransferase H	34 kDa	0.00077365	0.00034408		0.00027414	0.00023629	0.0001887	0.000558865	0.000233043	2.39812	0	2	3	true
PROKKA_03739	Protein synthesis	Translation factors	0	Translation initiation factor IF-2	90 kDa	0.0010178	0.00025868		0.00025762	0.0014803	0.00092209	0.00063824	0.00088667	0.719817	0	2	3	true
PROKKA_04495	Protein synthesis	Ribosomal proteins: synthesis and modification	ribosomal protein bS1	30S ribosomal protein S1	62 kDa	0.0074572	0.0040572	0.0064467	0.0036173	0.0083586	0.0043441	0.00598703	0.00544	1.10056	0	3	3	true
PROKKA_00021	Protein synthesis	Ribosomal proteins: synthesis and modification	ribosomal protein uS10	30S ribosomal protein S10	12 kDa	0.001183	0.0021046	0.0058521	0.0016767	0.0024088	0.0020198	0.00304657	0.0020351	1.49701	0	3	3	true
PROKKA_04769	Protein synthesis	Ribosomal proteins: synthesis and modification	ribosomal protein uS2	30S ribosomal protein S2	27 kDa	0.0074602	0.006341	0.0024603	0.0095164	0.0069875	0.0054587	0.0054205	0.00732087	0.740418	0	3	3	true
PROKKA_00045	Protein synthesis	Ribosomal proteins: synthesis and modification	ribosomal protein uS4	30S ribosomal protein S4	23 kDa	0.014393	0.014031	0.0058521	0.0046111	0.0026497	0.0024526	0.0114254	0.0032378	3.52874	1	3	3	true
PROKKA_00039	Protein synthesis	Ribosomal proteins: synthesis and modification	ribosomal protein uS5	30S ribosomal protein S5	18 kDa	0.0092978	0.0093587	0.0054467	0.0093635	0.010313	0.010563	0.0080344	0.0100798	0.797077	1	3	3	true
PROKKA_03189	Protein synthesis	Ribosomal proteins: synthesis and modification	ribosomal protein bS6	30S ribosomal protein S6	16 kDa	0.0034814	0.0056774	0.010764	0.006168	0.0044305	0.0048825	0.00664093	0.00516033	1.28692	0	3	3	true
PROKKA_00018	Protein synthesis	Ribosomal proteins: synthesis and modification	ribosomal protein uS7	30S ribosomal protein S7	18 kDa	0.0023433	0.0044003	0.013524	0.0066425	0.0022266	0.0032387	0.00675587	0.00403593	1.67393	0	3	3	true
PROKKA_00012	Protein synthesis	Ribosomal proteins: synthesis and modification	ribosomal protein uL1	50S ribosomal protein L1	24 kDa	0.015121	0.018455	0.013047	0.017009	0.0099887	0.011708	0.015541	0.0129019	1.20455	0	3	3	true
PROKKA_00013	Protein synthesis	Ribosomal proteins: synthesis and modification	ribosomal protein uL10	50S ribosomal protein L10	18 kDa	0.0034255	0.0056587	0.0072622	0.0062424	0.0046333	0.005013	0.0054488	0.00529623	1.02881	0	3	3	true
PROKKA_00011	Protein synthesis	Ribosomal proteins: synthesis and modification	ribosomal protein uL11	50S ribosomal protein L11	15 kDa	0.0076689	0.0085901	0.010538	0.0075483	0.007981	0.0076897	0.00893233	0.00773967	1.1541	0	3	3	true
PROKKA_01019	Protein synthesis	Ribosomal proteins: synthesis and modification	ribosomal protein uL13	50S ribosomal protein L13	16 kDa	0.0022883	0.0022899	0.0063672	0.0036487	0.0012231	0.0033487	0.00364847	0.00274017	1.33148	0	3	3	true
PROKKA_00032	Protein synthesis	Ribosomal proteins: synthesis and modification	ribosomal protein uL14	50S ribosomal protein L14	13 kDa	0.013983	0.011549	0.027174	0.012387	0.0056942	0.0068209	0.0175687	0.0083007	2.11653	0	3	3	true
PROKKA_00041	Protein synthesis	Ribosomal proteins: synthesis and modification	ribosomal protein uL15	50S ribosomal protein L15	15 kDa	0.0044818	0.0049833	0.008314	0.0074442	0.0025666	0.0045092	0.00592637	0.00484	1.22446	0	3	3	true
PROKKA_00038	Protein synthesis	Ribosomal proteins: synthesis and modification	ribosomal protein uL18	50S ribosomal protein L18	13 kDa	0.012255	0.0090322	0.031178	0.011911	0.011764	0.01281	0.0174884	0.0121617	1.43799	0	3	3	true
PROKKA_04985	Protein synthesis	Ribosomal proteins: synthesis and modification	ribosomal protein bL19	50S ribosomal protein L19	13 kDa	0.0066527	0.010901	0.028579	0.0085608	0.0098387	0.013579	0.0153776	0.0106595	1.44262	0	3	3	true
PROKKA_00025	Protein synthesis	Ribosomal proteins: synthesis and modification	ribosomal protein uL2	50S ribosomal protein L2	30 kDa	0.0045953	0.003692	0.0065996	0.002994	0.0037125	0.0034709	0.0049623	0.00339247	1.46274	0	3	3	true
PROKKA_00027	Protein synthesis	Ribosomal proteins: synthesis and modification	ribosomal protein uL22	50S ribosomal protein L22	12 kDa	0.0062771	0.0068973	0.016439	0.0047101	0.0056388	0.0056738	0.00987113	0.0053409	1.84822	1	3	3	true
PROKKA_00024	Protein synthesis	Ribosomal proteins: synthesis and modification	ribosomal protein uL23	50S ribosomal protein L23	11 kDa	0.0016411	0.0036494	0.0091328	0.0043612	0.0017543	0.0021014	0.00480777	0.00273897	1.75532	0	3	3	true
PROKKA_00033	Protein synthesis	Ribosomal proteins: synthesis and modification	ribosomal protein uL24	50S ribosomal protein L24	11 kDa	0.0019527	0.0038213	0.0086937	0.0041516	0.0014314	0.0022861	0.00482257	0.00262303	1.83855	0	3	3	true
PROKKA_03838	Protein synthesis	Ribosomal proteins: synthesis and modification	ribosomal protein bL25, Ctc-form	50S ribosomal protein L25	21 kDa	0.0057149	0.0050834	0.0060579	0.0041224	0.0037403	0.004331	0.00561873	0.00406457	1.38237	1	3	3	true
PROKKA_00022	Protein synthesis	Ribosomal proteins: synthesis and modification	50S ribosomal protein uL3	50S ribosomal protein L3	23 kDa	0.0071223	0.0047943	0.0057134	0.0030694	0.0047034	0.0030987	0.00587667	0.00362383	1.62167	1	3	3	true
PROKKA_00023	Protein synthesis	Ribosomal proteins: synthesis and modification	50S ribosomal protein uL4	50S ribosomal protein L4	22 kDa	0.0046709	0.0039742	0.010548	0.0043176	0.0034735	0.0032692	0.0063977	0.00368677	1.73531	0	3	3	true
PROKKA_00034	Protein synthesis	Ribosomal proteins: synthesis and modification	ribosomal protein uL5	50S ribosomal protein L5	20 kDa	0.0079418	0.0056514	0.011786	0.006995	0.0037424	0.005313	0.00845973	0.00535013	1.58122	0	3	3	true
PROKKA_00037	Protein synthesis	Ribosomal proteins: synthesis and modification	ribosomal protein uL6	50S ribosomal protein L6	19 kDa	0.0066547	0.0055112	0.011919	0.007562	0.0036445	0.0043656	0.0080283	0.0051907	1.54667	0	3	3	true
PROKKA_00014	Protein synthesis	Ribosomal proteins: synthesis and modification	ribosomal protein bL12	50S ribosomal protein L7/L12	12 kDa	0.0026854	0.0059717	0.019926	0.0053524	0.004511	0.0095791	0.0095277	0.00648083	1.47014	0	3	3	true
PROKKA_03064	Protein synthesis	tRNA aminoacylation	arginine--tRNA ligase	Arginine--tRNA ligase	64 kDa	0.0021081	0.0011251	0.0026071	0.00097109	0.0015882	0.0010798	0.00194677	0.00121303	1.60488	0	3	3	true
PROKKA_05566	Protein synthesis	tRNA aminoacylation	aspartate--tRNA ligase	Aspartate--tRNA ligase	66 kDa	0.0013745	0.00048905	0.0010199	0.00058445	0.002141	0.0012572	0.00096115	0.00132755	0.724003	0	3	3	true
PROKKA_00019	Protein synthesis	Translation factors	translation elongation factor G	Elongation factor G 1	77 kDa	0.0076482	0.0039685	0.0047293	0.0029564	0.0065123	0.0053843	0.00544867	0.004951	1.10052	0	3	3	true
PROKKA_05366	Protein synthesis	Translation factors	translation elongation factor P	Elongation factor P	21 kDa	0.0044892	0.0030424	0.0063449	0.0038631	0.0039175	0.0032848	0.0046255	0.00368847	1.25404	0	3	3	true
PROKKA_04768	Protein synthesis	Translation factors	translation elongation factor Ts	Elongation factor Ts	31 kDa	0.016983	0.018379	0.023103	0.012186	0.018673	0.016258	0.0194883	0.0157057	1.24085	0	3	3	true
PROKKA_00020	Protein synthesis	Translation factors	translation elongation factor Tu	Elongation factor Tu	44 kDa	0.01463	0.0084634	0.022775	0.0079392	0.012374	0.0087587	0.0152895	0.00969063	1.57776	0	3	3	true
PROKKA_02775	Protein synthesis	Translation factors	translation initiation factor IF-3	Translation initiation factor IF-3	20 kDa	0.0050484	0.0042865	0.0034055	0.0041469	0.0036445	0.003694	0.0042468	0.00382847	1.10927	0	3	3	true
PROKKA_01014	Protein synthesis	tRNA aminoacylation	tryptophan--tRNA ligase	Tryptophan--tRNA ligase	49 kDa	0.0010807	0.0010414	0.0013365	0.0011488	0.0008802	0.00092257	0.00115287	0.000983857	1.17178	0	3	3	true
PROKKA_03338	Purines, pyrimidines, nucleosides, and nucleotides	2'-Deoxyribonucleotide metabolism	dUTP diphosphatase	Deoxyuridine 5'-triphosphate nucleotidohydrolase	16 kDa		0.00071779					0.00071779			0	1	off	false
PROKKA_05544	Purines, pyrimidines, nucleosides, and nucleotides	Purine ribonucleotide biosynthesis	formyltetrahydrofolate deformylase	Formyltetrahydrofolate deformylase	32 kDa	0.00028806						0.00028806			0	1	off	false
PROKKA_05074	Purines, pyrimidines, nucleosides, and nucleotides	Nucleotide and nucleoside interconversions	dTMP kinase	Thymidylate kinase	23 kDa		0.00034408					0.00034408			0	1	off	false
PROKKA_01438	Purines, pyrimidines, nucleosides, and nucleotides	Purine ribonucleotide biosynthesis	inosine-5'-monophosphate dehydrogenase	Hypoxic response protein 1	16 kDa					0.00050981			0.00050981		0	off	1	false
PROKKA_05739	Purines, pyrimidines, nucleosides, and nucleotides	Other	futalosine hydrolase	Purine nucleoside permease (NUP)	38 kDa				0.00037764				0.00037764		0	off	1	false
PROKKA_04118	Purines, pyrimidines, nucleosides, and nucleotides	Other	allantoicase	allantoicase	37 kDa		0.0002183			0.00014991		0.0002183	0.00014991	1.45621	0	1	1	false
PROKKA_02075	Purines, pyrimidines, nucleosides, and nucleotides	Purine ribonucleotide biosynthesis	GMP synthase (glutamine-hydrolyzing), N-terminal domain	GMP synthase [glutamine-hydrolyzing]	27 kDa	0.00067413			0.00035831			0.00067413	0.00035831	1.88142	0	1	1	false
PROKKA_00702	Purines, pyrimidines, nucleosides, and nucleotides	Purine ribonucleotide biosynthesis	phosphoribosylaminoimidazole carboxylase, ATPase subunit	N5-carboxyaminoimidazole ribonucleotide synthase	39 kDa	0.00022502				0.00020618		0.00022502	0.00020618	1.09138	0	1	1	false
PROKKA_03334	Purines, pyrimidines, nucleosides, and nucleotides	Pyrimidine ribonucleotide biosynthesis	orotate phosphoribosyltransferase	Orotate phosphoribosyltransferase	23 kDa		0.0006753				0.00055551	0.0006753	0.00055551	1.21564	0	1	1	false
PROKKA_00450	Purines, pyrimidines, nucleosides, and nucleotides	Pyrimidine ribonucleotide biosynthesis	aspartate carbamoyltransferase	Aspartate carbamoyltransferase	36 kDa	0.00072964	0.00086536		0.00051708			0.0007975	0.00051708	1.54231	0	2	1	false
PROKKA_03046	Purines, pyrimidines, nucleosides, and nucleotides	Purine ribonucleotide biosynthesis	-	phosphoribosyl-AMP cyclohydrolase	15 kDa	0.00062487	0.00083374			0.0003817		0.000729305	0.0003817	1.91068	0	2	1	false
PROKKA_04767	Purines, pyrimidines, nucleosides, and nucleotides	Nucleotide and nucleoside interconversions	UMP kinase	Uridylate kinase	27 kDa	0.00148	0.00043881				0.0015642	0.000959405	0.0015642	0.613352	0	2	1	false
PROKKA_04751	Purines, pyrimidines, nucleosides, and nucleotides	Pyrimidine ribonucleotide biosynthesis	CTP synthase	CTP synthase	60 kDa	0.0002244				0.00031984	0.00054733	0.0002244	0.000433585	0.517546	0	1	2	false
PROKKA_02015	Purines, pyrimidines, nucleosides, and nucleotides	Pyrimidine ribonucleotide biosynthesis	dihydroorotate dehydrogenase (fumarate)	Dihydroorotate dehydrogenase (quinone)	36 kDa	0.00047925				0.00029275	0.00026301	0.00047925	0.00027788	1.72467	0	1	2	false
PROKKA_03168	Purines, pyrimidines, nucleosides, and nucleotides	Other	-	Oligoribonuclease	20 kDa		0.0010036		0.0011993		0.00066044	0.0010036	0.00092987	1.07929	0	1	2	false
PROKKA_03359	Purines, pyrimidines, nucleosides, and nucleotides	Salvage of nucleosides and nucleotides	xanthine phosphoribosyltransferase	Xanthine phosphoribosyltransferase	20 kDa		0.0003803			0.00026116	0.00046926	0.0003803	0.00036521	1.04132	0	1	2	false
PROKKA_03727	Purines, pyrimidines, nucleosides, and nucleotides	Pyrimidine ribonucleotide biosynthesis	carbamoyl-phosphate synthase, small subunit	Carbamoyl-phosphate synthase small chain	41 kDa	0.00032235	0.00019116		0.00022845		0.00039312	0.000256755	0.000310785	0.82615	0	2	2	true
PROKKA_03329	Purines, pyrimidines, nucleosides, and nucleotides	Nucleotide and nucleoside interconversions	guanylate kinase	Guanylate kinase	23 kDa	0.00039434		0.002926	0.00062878	0.00024088		0.00166017	0.00043483	3.81797	0	2	2	true
PROKKA_04797	Purines, pyrimidines, nucleosides, and nucleotides	Nucleotide and nucleoside interconversions	adenylate kinase	Adenylate kinase	23 kDa	0.0030226	0.0031928		0.0038156	0.0039235	0.0023499	0.0031077	0.003363	0.924086	0	2	3	true
PROKKA_02643	Purines, pyrimidines, nucleosides, and nucleotides	Purine ribonucleotide biosynthesis	adenylosuccinate lyase	Adenylosuccinate lyase	51 kDa	0.0015142	0.00063384		0.00028405	0.0013058	0.0005214	0.00107402	0.00070375	1.52614	0	2	3	true
PROKKA_03181	Purines, pyrimidines, nucleosides, and nucleotides	Purine ribonucleotide biosynthesis	adenylosuccinate synthase	Adenylosuccinate synthetase	47 kDa	0.00047339	0.00025265		0.00030193	0.00080967	0.00048494	0.00036302	0.00053218	0.682138	0	2	3	true
PROKKA_03623	Purines, pyrimidines, nucleosides, and nucleotides	Other	AMP nucleosidase	AMP nucleosidase	54 kDa	0.0010842	0.00096442		0.00044329	0.00081513	0.00067129	0.00102431	0.000643237	1.59243	1	2	3	true
PROKKA_03728	Purines, pyrimidines, nucleosides, and nucleotides	Pyrimidine ribonucleotide biosynthesis	carbamoyl-phosphate synthase, large subunit	Carbamoyl-phosphate synthase large chain	117 kDa	0.00083277	0.00016835		0.00016096	0.00043933	0.00041547	0.00050056	0.000338587	1.47838	0	2	3	true
PROKKA_04494	Purines, pyrimidines, nucleosides, and nucleotides	Nucleotide and nucleoside interconversions	cytidylate kinase	Cytidylate kinase	25 kDa	0.00070946	0.0018932		0.0011313	0.00086675	0.0006489	0.00130133	0.000882317	1.4749	0	2	3	true
PROKKA_04736	Purines, pyrimidines, nucleosides, and nucleotides	2'-Deoxyribonucleotide metabolism	deoxycytidine triphosphate deaminase	Deoxycytidine triphosphate deaminase	21 kDa	0.0017284	0.0021139		0.001378	0.0018476	0.0017389	0.00192115	0.00165483	1.16093	0	2	3	true
PROKKA_04036	Purines, pyrimidines, nucleosides, and nucleotides	Pyrimidine ribonucleotide biosynthesis	dihydroorotase, homodimeric type	Dihydroorotase	38 kDa	0.00046686	0.00051909		0.00024814	0.00042777	0.00034161	0.000492975	0.000339173	1.45346	0	2	3	true
PROKKA_00449	Purines, pyrimidines, nucleosides, and nucleotides	Pyrimidine ribonucleotide biosynthesis	dihydroorotase, multifunctional complex type	Dihydroorotase	44 kDa	0.00057612	0.0007687		0.00030621	0.00046923	0.00028104	0.00067241	0.00035216	1.90939	0	2	3	true
PROKKA_00701	Purines, pyrimidines, nucleosides, and nucleotides	Purine ribonucleotide biosynthesis	phosphoribosylaminoimidazole carboxylase, catalytic subunit	N5-carboxyaminoimidazole ribonucleotide mutase	17 kDa	0.0024918	0.0033247		0.0034435	0.0013699	0.0023703	0.00290825	0.00239457	1.21452	0	2	3	true
PROKKA_02340	Purines, pyrimidines, nucleosides, and nucleotides	Purine ribonucleotide biosynthesis	phosphoribosylaminoimidazolesuccinocarboxamide synthase	Phosphoribosylaminoimidazole-succinocarboxamide synthase	27 kDa	0.0022279	0.0012195		0.0010931	0.0028265	0.0035112	0.0017237	0.00247693	0.695901	0	2	3	true
PROKKA_01914	Purines, pyrimidines, nucleosides, and nucleotides	Purine ribonucleotide biosynthesis	phosphoribosylformylglycinamidine cyclo-ligase	Phosphoribosylformylglycinamidine cyclo-ligase	37 kDa	0.0023078	0.0013343		0.0011039	0.0013392	0.001182	0.00182105	0.00120837	1.50703	0	2	3	true
PROKKA_04963	Purines, pyrimidines, nucleosides, and nucleotides	Purine ribonucleotide biosynthesis	phosphoribosylformylglycinamidine synthase	Phosphoribosylformylglycinamidine synthase	141 kDa	0.00093875	0.00025051		0.00016632	0.00084104	0.00045793	0.00059463	0.00048843	1.21743	0	2	3	true
PROKKA_03839	Purines, pyrimidines, nucleosides, and nucleotides	Purine ribonucleotide biosynthesis	ribose-phosphate diphosphokinase	Ribose-phosphate pyrophosphokinase	34 kDa	0.0053719	0.0045452		0.002507	0.0019208	0.0016298	0.00495855	0.0020192	2.4557	1	2	3	true
PROKKA_01075	Purines, pyrimidines, nucleosides, and nucleotides	Salvage of nucleosides and nucleotides	uracil phosphoribosyltransferase	Uracil phosphoribosyltransferase	23 kDa	0.00057476	0.00051126		0.0014256	0.00058516	0.00070094	0.00054301	0.0009039	0.600741	0	2	3	true
PROKKA_05540	Purines, pyrimidines, nucleosides, and nucleotides	Purine ribonucleotide biosynthesis	amidophosphoribosyltransferase	Amidophosphoribosyltransferase	55 kDa	0.00048643	0.00028845	0.0012031	0.00017236	0.00084188	0.00029661	0.000659327	0.00043695	1.50893	0	3	3	true
PROKKA_03262	Purines, pyrimidines, nucleosides, and nucleotides	Purine ribonucleotide biosynthesis	phosphoribosylaminoimidazolecarboxamide formyltransferase/IMP cyclohydrolase	Bifunctional purine biosynthesis protein PurH	57 kDa	0.0018221	0.001148	0.00169	0.00032281	0.0010666	0.00077772	0.00155337	0.000722377	2.15036	1	3	3	true
PROKKA_01457	Purines, pyrimidines, nucleosides, and nucleotides	Purine ribonucleotide biosynthesis	GMP synthase (glutamine-hydrolyzing), C-terminal domain	GMP synthase [glutamine-hydrolyzing]	58 kDa	0.002321	0.0014451	0.0022962	0.00090465	0.001654	0.00090575	0.00202077	0.0011548	1.74988	0	3	3	true
PROKKA_01458	Purines, pyrimidines, nucleosides, and nucleotides	Purine ribonucleotide biosynthesis	inosine-5'-monophosphate dehydrogenase	Inosine-5'-monophosphate dehydrogenase	52 kDa	0.00083061	0.00051718	0.0024653	0.00044148	0.00086254	0.00085087	0.00127103	0.000718297	1.76951	0	3	3	true
PROKKA_01476	Purines, pyrimidines, nucleosides, and nucleotides	Other	-	Nucleoside diphosphate kinase	15 kDa	0.009218	0.017424	0.0085499	0.01776	0.011965	0.018127	0.0117306	0.0159507	0.735432	0	3	3	true
PROKKA_03261	Purines, pyrimidines, nucleosides, and nucleotides	Purine ribonucleotide biosynthesis	phosphoribosylamine--glycine ligase	Phosphoribosylamine--glycine ligase	45 kDa	0.0017002	0.0010082	0.0014018	0.00060246	0.001154	0.0012441	0.00137007	0.00100019	1.36981	0	3	3	true
PROKKA_05100	Purines, pyrimidines, nucleosides, and nucleotides	2'-Deoxyribonucleotide metabolism	ribonucleoside-diphosphate reductase, alpha subunit	Ribonucleoside-diphosphate reductase 1 subunit alpha	107 kDa	0.0040027	0.0027359	0.00093791	0.0012541	0.0029083	0.0022506	0.00255884	0.00213767	1.19702	0	3	3	true
PROKKA_03928	Regulatory functions	DNA interactions	D-fructose-responsive transcription factor	HTH-type transcriptional regulator KdgR	39 kDa		0.00020127					0.00020127			0	1	off	false
PROKKA_00070	Regulatory functions	DNA interactions	transcriptional repressor BetI	HTH-type transcriptional regulator TtgR	24 kDa		0.00034408					0.00034408			0	1	off	false
PROKKA_01793	Regulatory functions	DNA interactions	homoprotocatechuate degradation operon regulator, HpaR	Transcriptional regulator SlyA	16 kDa		0.00050179					0.00050179			0	1	off	false
PROKKA_00726	Regulatory functions	DNA interactions	transcriptional regulator, y4mF family	Helix-turn-helix	17 kDa				0.00055711				0.00055711		0	off	1	false
PROKKA_02036	Regulatory functions	Other	-	Phosphoenolpyruvate synthase regulatory protein	31 kDa						0.00021853		0.00021853		0	off	1	false
PROKKA_05525	Regulatory functions	Small molecule interactions	PAS domain S-box protein	Phytochrome-like protein cph2	123 kDa				7.9077e-05				7.9077e-05		0	off	1	false
PROKKA_02243	Regulatory functions	DNA interactions	transcriptional repressor BetI	putative HTH-type transcriptional regulator TtgW	26 kDa						0.00025293		0.00025293		0	off	1	false
PROKKA_00457	Regulatory functions	DNA interactions	phosphate regulon transcriptional regulatory protein PhoB	Response regulator PleD	13 kDa				0.00071366				0.00071366		0	off	1	false
PROKKA_03626	Regulatory functions	Other	-	Leucine-responsive regulatory protein	18 kDa		0.00045445			0.00031208		0.00045445	0.00031208	1.4562	0	1	1	false
PROKKA_00712	Regulatory functions	Other	phosphate transport system regulatory protein PhoU	Phosphate-specific transport system accessory protein PhoU	29 kDa	0.00032108				0.00019613		0.00032108	0.00019613	1.63708	0	1	1	false
PROKKA_01641	Regulatory functions	Protein interactions	-	Sigma 54 modulation protein / S30EA ribosomal protein	15 kDa		0.0015939				0.00065558	0.0015939	0.00065558	2.43128	0	1	1	false
PROKKA_00978	Regulatory functions	DNA interactions	D-fructose-responsive transcription factor	Catabolite repressor/activator	36 kDa				0.00026088		0.00017958		0.00022023	on UT	0	off	2	false
PROKKA_01026	Regulatory functions	Transcription factors	phosphonate utilization associated transcriptional regulator	HTH-type transcriptional regulator LutR	28 kDa					0.00029892	0.00035807		0.000328495	on UT	0	off	2	false
PROKKA_02878	Regulatory functions	DNA interactions	phosphate regulon transcriptional regulatory protein PhoB	Transcriptional regulatory protein OmpR	27 kDa	0.00066043			0.0012286		0.00024162	0.00066043	0.00073511	0.89841	0	1	2	false
PROKKA_00527	Regulatory functions	DNA interactions	PEP-CTERM-box response regulator transcription factor	Alginate biosynthesis transcriptional regulatory protein AlgB	50 kDa	0.0018132	0.0012097	0.0020182		0.00038767	0.00026536	0.00168037	0.000326515	5.14637	1	3	2	true
PROKKA_01992	Regulatory functions	DNA interactions	DNA-binding protein, YbaB/EbfC family	Nucleoid-associated protein	12 kDa		0.00096773		0.001542	0.00044305	0.0015921	0.00096773	0.00119238	0.811593	0	1	3	false
PROKKA_02614	Regulatory functions	DNA interactions	transcriptional repressor BetI	putative DNA-binding transcriptional regulator	27 kDa		0.00044603		0.00053304	0.0004084	0.00048922	0.00044603	0.000476887	0.935296	0	1	3	false
PROKKA_02562	Regulatory functions	DNA interactions	DNA-binding regulatory protein, YebC/PmpR family	putative transcriptional regulatory protein	25 kDa	0.00034715			0.00036903	0.00021206	0.00050803	0.00034715	0.00036304	0.956231	0	1	3	false
PROKKA_03008	Regulatory functions	Other	GTP-binding protein TypA/BipA	GTP-binding protein TypA/BipA	67 kDa	0.00080429	0.00041733		0.00035624	0.00077789	0.00029426	0.00061081	0.00047613	1.28286	0	2	3	true
PROKKA_05362	Regulatory functions	DNA interactions	aminoethylphosphonate catabolism associated LysR family transcriptional regulator	HTH-type transcriptional regulator CysB	36 kDa	0.00037608	0.00022302		0.00039978	0.00045946	0.00027518	0.00029955	0.00037814	0.792167	0	2	3	true
PROKKA_02008	Regulatory functions	Transcription factors	phosphonate utilization associated transcriptional regulator	putative HTH-type transcriptional regulator YdfH	28 kDa	0.00031982	0.00028448		0.00033997	0.00039072	0.00023401	0.00030215	0.000321567	0.939619	0	2	3	true
PROKKA_01987	Regulatory functions	DNA interactions	global nitrogen regulator NtcA	Transcriptional activator protein Anr	27 kDa	0.0016646	0.0014807		0.00070781	0.0016269	0.00085262	0.00157265	0.00106244	1.48022	0	2	3	true
PROKKA_03721	Regulatory functions	Other	-	Ferric uptake regulation protein	15 kDa	0.0021218	0.0040443	0.0067474	0.0067664	0.0018515	0.0039922	0.0043045	0.00420337	1.02406	0	3	3	true
PROKKA_01056	Signal transduction	PTS	PTS IIA-like nitrogen-regulatory protein PtsN	Nitrogen regulatory protein	17 kDa		0.00070381					0.00070381			0	1	off	false
PROKKA_03369	Signal transduction	PTS	-	Nitrogen regulatory protein P-II 2	12 kDa		0.00096773		0.003084	0.00066457	0.0021228	0.00096773	0.00195712	0.494466	0	1	3	false
PROKKA_02351	Transcription	Transcription factors	RNA polymerase sigma factor RpoE	ECF RNA polymerase sigma-E factor	22 kDa		0.00037439					0.00037439			0	1	off	false
PROKKA_04367	Transcription	Transcription factors	RNA polymerase sigma factor, sigma-70 family	Transcriptional regulator LsrR	35 kDa	0.00024918	0.00033247					0.000290825		on T	0	2	off	false
PROKKA_05680	Transcription	Transcription factors	-	Bacterial transcription activator, effector binding domain	18 kDa						0.0003715		0.0003715		0	off	1	false
PROKKA_03548	Transcription	Transcription factors	transcription antitermination factor NusB	hypothetical protein	19 kDa					0.00044838			0.00044838		0	off	1	false
PROKKA_01618	Transcription	RNA processing	ribonuclease III	Ribonuclease 3	25 kDa					0.00043337			0.00043337		0	off	1	false
PROKKA_03757	Transcription	Transcription factors	RNA polymerase-binding protein DksA	RNA polymerase-binding transcription factor DksA	17 kDa		0.00073732				0.00040435	0.00073732	0.00040435	1.82347	0	1	1	false
PROKKA_02287	Transcription	RNA processing	ribonuclease D	Ribonuclease D	43 kDa	0.00032321	0.00057499			0.00013162		0.0004491	0.00013162	3.4121	0	2	1	false
PROKKA_04037	Transcription	RNA processing	ribonuclease T	Ribonuclease T	25 kDa	0.00036427	0.00064805			0.00077881		0.00050616	0.00077881	0.649915	0	2	1	false
PROKKA_04255	Transcription	Transcription factors	-	Helix-turn-helix	22 kDa		0.00037439		0.00067113	0.0002571		0.00037439	0.000464115	0.806675	0	1	2	false
PROKKA_03419	Transcription	Transcription factors	transcription termination factor Rho	hypothetical protein	47 kDa	0.00048469	0.00025868			0.00053292	0.00042558	0.000371685	0.00047925	0.775556	0	2	2	true
PROKKA_03331	Transcription	RNA processing	ribonuclease PH	Ribonuclease PH	26 kDa	0.0011847	0.0012043		0.0010794		0.0012383	0.0011945	0.00115885	1.03076	0	2	2	true
PROKKA_00010	Transcription	Transcription factors	transcription termination/antitermination factor NusG	hypothetical protein	18 kDa		0.0015906		0.0019008	0.00031208	0.00074767	0.0015906	0.00098685	1.6118	0	1	3	false
PROKKA_03187	Transcription	Degradation of RNA	ribonuclease R	Ribonuclease R	97 kDa	0.00055703			0.00019738	0.00051039	0.00033966	0.00055703	0.000349143	1.59542	0	1	3	false
PROKKA_03740	Transcription	RNA processing	ribosome-binding factor A	Ribosome-binding factor A	15 kDa		0.0022063		0.001648	0.00037879	0.0011343	0.0022063	0.0010537	2.09387	0	1	3	false
PROKKA_03729	Transcription	Transcription factors	transcription elongation factor GreA	Transcription elongation factor GreA	18 kDa		0.0013548		0.0024287	0.0004652	0.000743	0.0013548	0.0012123	1.11755	0	1	3	false
PROKKA_04682	Transcription	Transcription factors	RNA polymerase sigma factor RpoD	RNA polymerase sigma factor RpoD	69 kDa	0.0013209	0.00058746		0.00070205	0.0010892	0.00062822	0.00095418	0.00080649	1.18313	0	2	3	true
PROKKA_00046	Transcription	DNA-dependent RNA polymerase	DNA-directed RNA polymerase, alpha subunit	DNA-directed RNA polymerase subunit alpha	37 kDa	0.0053668	0.0039058	0.0054303	0.0032415	0.0036508	0.0037484	0.00490097	0.0035469	1.38176	1	3	3	true
PROKKA_00015	Transcription	DNA-dependent RNA polymerase	DNA-directed RNA polymerase, beta subunit	DNA-directed RNA polymerase subunit beta	151 kDa	0.0032326	0.00058573	0.0011105	0.00057271	0.002322	0.0017521	0.00164294	0.00154894	1.06069	0	3	3	true
PROKKA_00016	Transcription	DNA-dependent RNA polymerase	DNA-directed RNA polymerase, beta' subunit	DNA-directed RNA polymerase subunit beta'	155 kDa	0.002642	0.00061979	0.0017234	0.00037035	0.001401	0.0010834	0.00166173	0.000951583	1.74628	0	3	3	true
PROKKA_03738	Transcription	Transcription factors	transcription termination factor NusA	hypothetical protein	54 kDa	0.0011534	0.0004397	0.0030566	0.0010509	0.002466	0.0012057	0.0015499	0.0015742	0.984564	0	3	3	true
PROKKA_03743	Transcription	Degradation of RNA	polyribonucleotide nucleotidyltransferase	Polyribonucleotide nucleotidyltransferase	75 kDa	0.00591	0.0031439	0.0038694	0.001971	0.0043534	0.0027558	0.00430777	0.00302673	1.42324	0	3	3	true
PROKKA_05088	Transcription	Degradation of RNA	ribonuclease, Rne/Rng family	Ribonuclease E	115 kDa	0.0023938	0.00089292	0.0011459	0.00041042	0.0011556	0.00045201	0.00147754	0.000672677	2.19651	0	3	3	true
PROKKA_04040	Transport and binding proteins	Cations and iron carrying compounds	bacterioferritin	Bacterioferritin	18 kDa	0.0010415						0.0010415			0	1	off	false
PROKKA_00990	Transport and binding proteins	Amino acids, peptides and amines	choline ABC transporter, permease protein	Choline transport system permease protein OpuBB	23 kDa		0.00033298					0.00033298			0	1	off	false
PROKKA_04962	Transport and binding proteins	Amino acids, peptides and amines	lysine-arginine-ornithine-binding periplasmic protein	Membrane-bound lytic murein transglycosylase F precursor	55 kDa		0.00014868					0.00014868			0	1	off	false
PROKKA_00544	Transport and binding proteins	Amino acids, peptides and amines	D-methionine ABC transporter, ATP-binding protein	Methionine import ATP-binding protein MetN	37 kDa		0.00032354					0.00032354			0	1	off	false
PROKKA_05155	Transport and binding proteins	Anions	molybdate ABC transporter, periplasmic molybdate-binding protein	Molybdate-binding periplasmic protein precursor	26 kDa	0.00032493						0.00032493			0	1	off	false
PROKKA_03341	Transport and binding proteins	Cations and iron carrying compounds	nickel ABC transporter, nickel/metallophore periplasmic binding protein	Periplasmic dipeptide transport protein precursor	58 kDa		0.00013633					0.00013633			0	1	off	false
PROKKA_03683	Transport and binding proteins	Other	ATP-binding cassette protein, ChvD family	putative ABC transporter ATP-binding protein	61 kDa	0.00029326						0.00029326			0	1	off	false
PROKKA_01304	Transport and binding proteins	Cations and iron carrying compounds	2,3-dihydro-2,3-dihydroxybenzoate dehydrogenase	Fatty acyl-CoA reductase	28 kDa	0.00031856	0.00085009					0.000584325		on T	0	2	off	false
PROKKA_04371	Transport and binding proteins	Carbohydrates, organic alcohols, and acids	D-xylose ABC transporter, D-xylose-binding protein	ABC transporter periplasmic-binding protein YtfQ precursor	36 kDa					0.00014812			0.00014812		0	off	1	false
PROKKA_00694	Transport and binding proteins	Amino acids, peptides and amines	amino acid carrier protein	Amino-acid carrier protein AlsT	52 kDa					0.00025791			0.00025791		0	off	1	false
PROKKA_05572	Transport and binding proteins	Other	protein TolQ	Biopolymer transport protein ExbB	25 kDa				0.00037382				0.00037382		0	off	1	false
PROKKA_03323	Transport and binding proteins	Cations and iron carrying compounds	tonB-system energizer ExbB	Biopolymer transport protein ExbB	34 kDa				0.00039611				0.00039611		0	off	1	false
PROKKA_03322	Transport and binding proteins	Other	TonB system transport protein ExbD	Biopolymer transport protein ExbD	15 kDa					0.00035192			0.00035192		0	off	1	false
PROKKA_01346	Transport and binding proteins	Carbohydrates, organic alcohols, and acids	D-xylose ABC transporter, D-xylose-binding protein	D-xylose-binding periplasmic protein precursor	36 kDa					0.00014901			0.00014901		0	off	1	false
PROKKA_05709	Transport and binding proteins	Amino acids, peptides and amines	lysine-arginine-ornithine-binding periplasmic protein	L-cystine-binding protein TcyA precursor	30 kDa				0.00031631				0.00031631		0	off	1	false
PROKKA_02595	Transport and binding proteins	Other	efflux pump membrane protein	Multidrug export protein EmrA	43 kDa					0.00012436			0.00012436		0	off	1	false
PROKKA_05588	Transport and binding proteins	Other	efflux pump membrane protein	Multidrug export protein EmrA	43 kDa				0.00033213				0.00033213		0	off	1	false
PROKKA_00997	Transport and binding proteins	Cations and iron carrying compounds	nickel import ATP-binding protein NikE	putative D,D-dipeptide transport ATP-binding protein DdpF	36 kDa					0.00015363			0.00015363		0	off	1	false
PROKKA_02939	Transport and binding proteins	Anions	sulfate ABC transporter, sulfate-binding protein	Sulfate-binding protein precursor	37 kDa				0.000257				0.000257		0	off	1	false
PROKKA_03517	Transport and binding proteins	Cations and iron carrying compounds	bacterioferritin	Bacterioferritin	18 kDa	0.001055				0.00032222		0.001055	0.00032222	3.27416	0	1	1	false
PROKKA_00683	Transport and binding proteins	Amino acids, peptides and amines	lysine-arginine-ornithine-binding periplasmic protein	Cystine-binding periplasmic protein precursor	30 kDa					0.00018176	0.00021773		0.000199745	on UT	0	off	2	false
PROKKA_04296	Transport and binding proteins	Carbohydrates, organic alcohols, and acids	D-xylose ABC transporter, D-xylose-binding protein	D-galactose-binding periplasmic protein precursor	34 kDa					0.00015955	0.00019112		0.000175335	on UT	0	off	2	false
PROKKA_05370	Transport and binding proteins	Cations and iron carrying compounds	TonB-dependent siderophore receptor	Ferripyoverdine receptor precursor	88 kDa					0.00015391	7.3746e-05		0.000113828	on UT	0	off	2	false
PROKKA_02443	Transport and binding proteins	Amino acids, peptides and amines	choline ABC transporter, periplasmic binding protein	Glycine betaine-binding protein OpuAC precursor	34 kDa				0.00054827	0.00015753			0.0003529	on UT	0	off	2	false
PROKKA_04650	Transport and binding proteins	Cations and iron carrying compounds	TonB-dependent hemoglobin/transferrin/lactoferrin receptor family protein	Hemin receptor precursor	93 kDa					8.7157e-05	0.000174		0.000130579	on UT	0	off	2	false
PROKKA_00538	Transport and binding proteins	Unknown substrate	anchored repeat ABC transporter, substrate-binding protein	High-affinity zinc uptake system protein ZnuA precursor	33 kDa				0.0002822		0.00038849		0.000335345	on UT	0	off	2	false
PROKKA_05330	Transport and binding proteins	Anions	phosphate ABC transporter, ATP-binding protein	hypothetical protein	74 kDa					0.00014879	8.9115e-05		0.000118953	on UT	0	off	2	false
PROKKA_01003	Transport and binding proteins	Cations and iron carrying compounds	nickel ABC transporter, nickel/metallophore periplasmic binding protein	Periplasmic dipeptide transport protein precursor	60 kDa				0.00016171	0.00013939			0.00015055	on UT	0	off	2	false
PROKKA_00656	Transport and binding proteins	Unknown substrate	anchored repeat ABC transporter, substrate-binding protein	putative periplasmic iron-binding protein precursor	31 kDa					0.0011046	0.00061068		0.00085764	on UT	0	off	2	false
PROKKA_01603	Transport and binding proteins	Cations and iron carrying compounds	TonB-dependent hemoglobin/transferrin/lactoferrin receptor family protein	putative TonB-dependent receptor precursor	72 kDa				0.0001285	0.00011076			0.00011963	on UT	0	off	2	false
PROKKA_05646	Transport and binding proteins	Amino acids, peptides and amines	putative 2-aminoethylphosphonate ABC transporter, permease protein	sn-glycerol-3-phosphate transport system permease protein UgpA	34 kDa					0.00049293	0.00059046		0.000541695	on UT	0	off	2	false
PROKKA_01920	Transport and binding proteins	Cations and iron carrying compounds	TonB-dependent siderophore receptor	Ferric aerobactin receptor precursor	78 kDa		0.00010235		0.00012231	0.00028114		0.00010235	0.000201725	0.507374	0	1	2	false
PROKKA_03021	Transport and binding proteins	Amino acids, peptides and amines	choline ABC transporter, periplasmic binding protein	Glycine betaine-binding periplasmic protein precursor	35 kDa	0.00025306	0.0002251			0.00023187	0.00046293	0.00023908	0.0003474	0.688198	0	2	2	true
PROKKA_05019	Transport and binding proteins	Carbohydrates, organic alcohols, and acids	exopolysaccharide transport protein family	LPS O-antigen length regulator	49 kDa	0.00092101	0.00081925			0.00039382	0.00026957	0.00087013	0.000331695	2.62328	1	2	2	true
PROKKA_02316	Transport and binding proteins	Anions	molybdate ABC transporter, periplasmic molybdate-binding protein	Bacterial extracellular solute-binding protein	27 kDa				0.00034267	0.00039382	0.00035381		0.000363433	on UT	0	off	3	false
PROKKA_01319	Transport and binding proteins	Cations and iron carrying compounds	proposed F420-0 ABC transporter, periplasmic F420-0 binding protein	Hemin-binding periplasmic protein HmuT precursor	37 kDa				0.0003855	0.00014768	0.00026536		0.00026618	on UT	0	off	3	false
PROKKA_03761	Transport and binding proteins	Cations and iron carrying compounds	heme ABC transporter, heme-binding protein isdE	Hemin-binding periplasmic protein HmuT precursor	30 kDa				0.0014786	0.00076471	0.0012214		0.0011549	on UT	0	off	3	false
PROKKA_04599	Transport and binding proteins	Other	2-aminoethylphosphonate ABC transporter, 2-aminoethylphosphonate binding protein	hypothetical protein	39 kDa				0.00060302	0.00076234	0.0009962		0.000787187	on UT	0	off	3	false
PROKKA_03209	Transport and binding proteins	Amino acids, peptides and amines	urea ABC transporter, urea binding protein	Leucine-, isoleucine-, valine-, threonine-, and alanine-binding protein precursor	40 kDa				0.00057112	0.0010502	0.0011794		0.000933573	on UT	0	off	3	false
PROKKA_01352	Transport and binding proteins	Amino acids, peptides and amines	lysine-arginine-ornithine-binding periplasmic protein	Lysine-arginine-ornithine-binding periplasmic protein precursor	28 kDa				0.0006694	0.00048083	0.00057597		0.0005754	on UT	0	off	3	false
PROKKA_04728	Transport and binding proteins	Amino acids, peptides and amines	lysine-arginine-ornithine-binding periplasmic protein	Lysine-arginine-ornithine-binding periplasmic protein precursor	27 kDa				0.0013336	0.00028738	0.00068849		0.000769823	on UT	0	off	3	false
PROKKA_01001	Transport and binding proteins	Cations and iron carrying compounds	nickel ABC transporter, nickel/metallophore periplasmic binding protein	Periplasmic dipeptide transport protein precursor	59 kDa				0.00081158	0.00041973	0.00033519		0.000522167	on UT	0	off	3	false
PROKKA_04286	Transport and binding proteins	Cations and iron carrying compounds	TonB-dependent siderophore receptor	putative TonB-dependent receptor BfrD precursor	78 kDa				0.00030492	0.00035043	0.00012593		0.000260427	on UT	0	off	3	false
PROKKA_00355	Transport and binding proteins	Anions	sulfate ABC transporter, sulfate-binding protein	Sulfate-binding protein precursor	37 kDa				0.00038898	0.00037253	0.00035699		0.000372833	on UT	0	off	3	false
PROKKA_00678	Transport and binding proteins	Cations and iron carrying compounds	oxaloacetate decarboxylase alpha subunit	2-oxoglutarate carboxylase large subunit	65 kDa	0.00013494			0.00014344	0.00053578	0.00083926	0.00013494	0.00050616	0.266596	0	1	3	false
PROKKA_02290	Transport and binding proteins	Amino acids, peptides and amines	lysine-arginine-ornithine-binding periplasmic protein	Cyclohexadienyl dehydratase precursor	33 kDa		0.00047853		0.0004289	0.00024646	0.00019682	0.00047853	0.000290727	1.64598	0	1	3	false
PROKKA_01690	Transport and binding proteins	Amino acids, peptides and amines	lysine-arginine-ornithine-binding periplasmic protein	General L-amino acid-binding periplasmic protein AapJ precursor	37 kDa		0.00021066		0.0012588	0.0011573	0.0011264	0.00021066	0.00118083	0.178399	0	1	3	false
PROKKA_04651	Transport and binding proteins	Cations and iron carrying compounds	-	Heme oxygenase	22 kDa		0.00035771		0.00064123	0.0004913	0.00058851	0.00035771	0.00057368	0.623536	0	1	3	false
PROKKA_02502	Transport and binding proteins	Amino acids, peptides and amines	lysine-arginine-ornithine-binding periplasmic protein	Histidine-binding periplasmic protein precursor	29 kDa		0.00041848		0.0011669	0.00076635	0.0011475	0.00041848	0.00102692	0.407511	0	1	3	false
PROKKA_05125	Transport and binding proteins	Anions	phosphate ABC transporter, phosphate-binding protein PstS	Phosphate-binding protein PstS precursor	37 kDa		0.00021066		0.00062939	0.00036167	0.00025994	0.00021066	0.000417	0.50518	0	1	3	false
PROKKA_02973	Transport and binding proteins	Amino acids, peptides and amines	lysine-arginine-ornithine-binding periplasmic protein	ABC transporter arginine-binding protein 1 precursor	28 kDa	0.00081233	0.0010116		0.0025906	0.0014886	0.0020209	0.000911965	0.00203337	0.4485	0	2	3	true
PROKKA_02890	Transport and binding proteins	Amino acids, peptides and amines	lysine-arginine-ornithine-binding periplasmic protein	Cystine-binding periplasmic protein precursor	29 kDa	0.00046155	0.0017791		0.003598	0.0020675	0.0025892	0.00112033	0.00275157	0.407159	0	2	3	true
PROKKA_03036	Transport and binding proteins	Amino acids, peptides and amines	lysine-arginine-ornithine-binding periplasmic protein	Cystine-binding periplasmic protein precursor	30 kDa	0.00076347	0.0010866		0.0011362	0.00083946	0.00067037	0.000925035	0.00088201	1.04878	0	2	3	true
PROKKA_02788	Transport and binding proteins	Carbohydrates, organic alcohols, and acids	rhamnose ABC transporter, rhamnose-binding protein	D-ribose-binding periplasmic protein precursor	33 kDa	0.00063662	0.00056628		0.0021656	0.0010111	0.0010248	0.00060145	0.0014005	0.429454	1	2	3	true
PROKKA_03247	Transport and binding proteins	Cations and iron carrying compounds	TonB-dependent copper receptor	Ferric enterobactin receptor precursor	74 kDa	0.00047366	0.00021066		0.0003147	0.00047017	0.00030326	0.00034216	0.00036271	0.943343	0	2	3	true
PROKKA_04483	Transport and binding proteins	Cations and iron carrying compounds	nickel ABC transporter, nickel/metallophore periplasmic binding protein	Glutathione-binding protein GsiB precursor	56 kDa	0.00096706	0.0011469		0.00042834	0.0013784	0.0012973	0.00105698	0.00103468	1.02155	0	2	3	true
PROKKA_04287	Transport and binding proteins	Amino acids, peptides and amines	choline ABC transporter, periplasmic binding protein	Glycine betaine-binding periplasmic protein precursor	37 kDa	0.00048497	0.00053924		0.00064442	0.00051843	0.00026615	0.000512105	0.000476333	1.0751	0	2	3	true
PROKKA_05029	Transport and binding proteins	Cations and iron carrying compounds	-	Iron uptake system component EfeO precursor	30 kDa	0.00044963	0.00053327		0.0023898	0.0013733	0.0017547	0.00049145	0.00183927	0.267199	1	2	3	true
PROKKA_03184	Transport and binding proteins	Amino acids, peptides and amines	putative 2-aminoethylphosphonate ABC transporter, periplasmic 2-aminoethylphosphonate-binding protein	Iron-utilization periplasmic protein precursor	37 kDa	0.0016675	0.002013		0.0030388	0.0020372	0.0023532	0.00184025	0.0024764	0.743115	0	2	3	true
PROKKA_00101	Transport and binding proteins	Amino acids, peptides and amines	urea ABC transporter, urea binding protein	Leucine-, isoleucine-, valine-, threonine-, and alanine-binding protein precursor	40 kDa	0.00075818	0.0012525		0.002533	0.0033081	0.0026153	0.00100534	0.0028188	0.356655	1	2	3	true
PROKKA_04499	Transport and binding proteins	Carbohydrates, organic alcohols, and acids	polysaccharide export protein, MPA1 family	LPS O-antigen length regulator	47 kDa	0.0012483	0.00059788		0.00040829	0.00058654	0.00021078	0.00092309	0.00040187	2.29699	0	2	3	true
PROKKA_02904	Transport and binding proteins	Unknown substrate	efflux transporter, RND family, MFP subunit	Macrolide export protein MacA	38 kDa	0.00022818	0.00040594		0.00024256	0.00013939	0.00016697	0.00031706	0.000182973	1.73282	0	2	3	true
PROKKA_04201	Transport and binding proteins	Cations and iron carrying compounds	nickel ABC transporter, nickel/metallophore periplasmic binding protein	Oligopeptide-binding protein AppA precursor	69 kDa	0.00013317	0.00011845		0.00042468	0.00020337	9.7442e-05	0.00012581	0.000241831	0.52024	0	2	3	true
PROKKA_01004	Transport and binding proteins	Cations and iron carrying compounds	nickel ABC transporter, nickel/metallophore periplasmic binding protein	Periplasmic dipeptide transport protein precursor	60 kDa	0.00029975	0.00039995		0.00079661	0.0009613	0.00076767	0.00034985	0.00084186	0.415568	1	2	3	true
PROKKA_00071	Transport and binding proteins	Unknown substrate	efflux transporter, RND family, MFP subunit	putative efflux pump periplasmic linker TtgA precursor	41 kDa	0.00085061	0.0012295		0.00045211	0.00071444	0.0005446	0.00104006	0.000570383	1.82343	0	2	3	true
PROKKA_03464	Transport and binding proteins	Amino acids, peptides and amines	putative 2-aminoethylphosphonate ABC transporter, periplasmic 2-aminoethylphosphonate-binding protein	Putrescine-binding periplasmic protein precursor	40 kDa	0.00088058	0.00068537		0.0014041	0.00087409	0.0014497	0.000782975	0.00124263	0.630095	0	2	3	true
PROKKA_05648	Transport and binding proteins	Amino acids, peptides and amines	putative 2-aminoethylphosphonate ABC transporter, ATP-binding protein	sn-glycerol-3-phosphate import ATP-binding protein UgpC	42 kDa	0.00073657	0.00065518		0.00089485	0.00096414	0.00053896	0.000695875	0.000799317	0.870587	0	2	3	true
PROKKA_03225	Transport and binding proteins	Cations and iron carrying compounds	bacterioferritin	Bacterioferritin	20 kDa	0.0018462	0.0030792	0.0034248	0.0012266	0.00028194	0.00067545	0.0027834	0.000727997	3.82337	1	3	3	true
PROKKA_05636	Transport and binding proteins	Cations and iron carrying compounds	-	Iron-regulated protein A precursor	47 kDa	0.001004	0.0014614	0.0013545	0.0018435	0.0018399	0.0019368	0.0012733	0.0018734	0.679673	1	3	3	true
PROKKA_01872	Transport and binding proteins	Amino acids, peptides and amines	lysine-arginine-ornithine-binding periplasmic protein	Lysine-arginine-ornithine-binding periplasmic protein precursor	28 kDa	0.0026455	0.0016611	0.0046189	0.0041357	0.0025666	0.0030745	0.00297517	0.00325893	0.912927	0	3	3	true
PROKKA_05575	Transport and binding proteins	Other	Tol-Pal system beta propeller repeat protein TolB	translocation protein TolB	46 kDa	0.0022296	0.0013796	0.0021579	0.0017518	0.0015988	0.0017023	0.00192237	0.0016843	1.14134	0	3	3	true
TRYP_PIG				contamination	24 kDa	0.0033408	0.0026588		0.0033644	0.0022555	0.0018012	0.0029998	0.0024737	1.21268	0	2	3	true
K22E_HUMAN				contamination	66 kDa	0.0024559	0.0014003	0.012149	0.002209	0.0018079	0.0025342	0.00533507	0.0021837	2.44313	0	3	3	true
K1C10_HUMAN				contamination	60 kDa	0.0034932	0.0025589	0.016772	0.0022571	0.0028869	0.003408	0.00760803	0.00285067	2.66886	0	3	3	true
K2C1_HUMAN				contamination	66 kDa	0.0066957	0.0046636	0.030935	0.0055733	0.0044759	0.0055927	0.0140981	0.00521397	2.70391	0	3	3	true
K1C9_HUMAN				contamination	62 kDa	0.0018907	0.0013918	0.011126	0.0014554	0.0020709	0.0014311	0.00480283	0.00165247	2.90646	0	3	3	true

## Sheet: treemap
					ratio
main role (TIRGRFAMS)	subrole (TIGRFAMS)	descr (TIGRFAMS)	Identified Proteins (1032)	Accession Number	T/UT	log2 ratio
Fatty acid and phospholipid metabolism	Biosynthesis	3-oxoacyl-[acyl-carrier-protein] reductase	3-oxoacyl-[acyl-carrier-protein] reductase FabG	PROKKA_05217	0.142116	-2.81486
No classification	No classification	-	PrkA AAA domain protein	PROKKA_04692	0.220801	-2.17918
No classification	Unknown function	-	hypothetical protein	PROKKA_01096	0.252067	-1.98812
Transport and binding proteins	Cations and iron carrying compounds	-	Iron uptake system component EfeO precursor	PROKKA_05029	0.267199	-1.90401
Energy metabolism	Sugars	UDP-glucose 4-epimerase GalE	UDP-glucose 4-epimerase	PROKKA_02836	0.277672	-1.84855
Protein fate	Degradation of proteins, peptides, and glycopeptides	-	Cytosol aminopeptidase	PROKKA_01623	0.300327	-1.73539
Fatty acid and phospholipid metabolism	Other	3-oxoacid CoA-transferase, B subunit	putative succinyl-CoA:3-ketoacid coenzyme A transferase subunit B	PROKKA_01443	0.356575	-1.48772
Transport and binding proteins	Amino acids, peptides and amines	urea ABC transporter, urea binding protein	Leucine-, isoleucine-, valine-, threonine-, and alanine-binding protein precursor	PROKKA_00101	0.356655	-1.4874
No classification	No classification	-	putative sugar-binding periplasmic protein precursor	PROKKA_05645	0.36792	-1.44253
No classification	No classification	-	Porin B precursor	PROKKA_05649	0.380778	-1.39298
Transport and binding proteins	Amino acids, peptides and amines	lysine-arginine-ornithine-binding periplasmic protein	Cystine-binding periplasmic protein precursor	PROKKA_02890	0.407159	-1.29634
Transport and binding proteins	Cations and iron carrying compounds	nickel ABC transporter, nickel/metallophore periplasmic binding protein	Periplasmic dipeptide transport protein precursor	PROKKA_01004	0.415568	-1.26684
Transport and binding proteins	Carbohydrates, organic alcohols, and acids	rhamnose ABC transporter, rhamnose-binding protein	D-ribose-binding periplasmic protein precursor	PROKKA_02788	0.429454	-1.21943
Transport and binding proteins	Amino acids, peptides and amines	lysine-arginine-ornithine-binding periplasmic protein	ABC transporter arginine-binding protein 1 precursor	PROKKA_02973	0.4485	-1.15682
No classification	Unknown function	-	hypothetical protein	PROKKA_01238	0.476475	-1.06953
No classification	Unknown function	-	hypothetical protein	PROKKA_00480	0.477615	-1.06608
Fatty acid and phospholipid metabolism	Biosynthesis	3-oxoacyl-[acyl-carrier-protein] reductase	C-factor	PROKKA_01830	0.49876	-1.00358
Energy metabolism	Amino acids and amines	histidine ammonia-lyase	Histidine ammonia-lyase	PROKKA_03025	0.500191	-0.999449
Energy metabolism	TCA cycle	isocitrate dehydrogenase, NADP-dependent	Isocitrate dehydrogenase [NADP]	PROKKA_02650	0.507616	-0.978189
Energy metabolism	Amino acids and amines	maleylacetoacetate isomerase	Disulfide-bond oxidoreductase YghU	PROKKA_05391	0.515011	-0.957324
Protein synthesis	tRNA aminoacylation	valine--tRNA ligase	Valine--tRNA ligase	PROKKA_01626	0.515226	-0.956723
DNA metabolism	DNA replication, recombination, and repair	integration host factor, beta subunit	DNA-binding protein HU-beta	PROKKA_02546	0.51863	-0.947224
Transport and binding proteins	Cations and iron carrying compounds	nickel ABC transporter, nickel/metallophore periplasmic binding protein	Oligopeptide-binding protein AppA precursor	PROKKA_04201	0.52024	-0.942751
No classification	No classification	-	putative nucleotide-binding protein	PROKKA_05557	0.536355	-0.89874
Cellular processes	Adaptations to atypical conditions	betaine-aldehyde dehydrogenase	Aldehyde dehydrogenase B	PROKKA_03577	0.540039	-0.888864
DNA metabolism	DNA replication, recombination, and repair	DNA topoisomerase I	DNA topoisomerase 1	PROKKA_02249	0.540641	-0.887257
Protein fate	Protein folding and stabilization	-	Peptidyl-prolyl cis-trans isomerase cyp18	PROKKA_02598	0.551427	-0.858758
Energy metabolism	Pentose phosphate pathway	6-phosphogluconolactonase	6-phosphogluconolactonase	PROKKA_05653	0.562333	-0.830504
Energy metabolism	Amino acids and amines	adenosylhomocysteinase	Adenosylhomocysteinase	PROKKA_00485	0.564363	-0.825304
Protein synthesis	Ribosomal proteins: synthesis and modification	ribosomal protein uS3	30S ribosomal protein S3	PROKKA_00028	0.566888	-0.818864
No classification	Unknown function	-	hypothetical protein	PROKKA_04786	0.567423	-0.817502
DNA metabolism	DNA replication, recombination, and repair	DNA gyrase, A subunit	DNA gyrase subunit A	PROKKA_04489	0.594397	-0.750502
Protein synthesis	Ribosomal proteins: synthesis and modification	ribosomal protein uL16	50S ribosomal protein L16	PROKKA_00029	0.59508	-0.748845
DNA metabolism	DNA replication, recombination, and repair	DNA polymerase III, beta subunit	DNA polymerase III subunit beta	PROKKA_00612	0.5955	-0.747827
Protein fate	Degradation of proteins, peptides, and glycopeptides	endopeptidase La	Lon protease	PROKKA_02545	0.599364	-0.738495
Purines, pyrimidines, nucleosides, and nucleotides	Salvage of nucleosides and nucleotides	uracil phosphoribosyltransferase	Uracil phosphoribosyltransferase	PROKKA_01075	0.600741	-0.735184
Energy metabolism	Amino acids and amines	L-asparaginase, type II	Glutaminase-asparaginase precursor	PROKKA_02789	0.604846	-0.725359
Energy metabolism	Amino acids and amines	delta-1-pyrroline-5-carboxylate dehydrogenase	Bifunctional protein PutA	PROKKA_03112	0.614643	-0.702178
Protein synthesis	Ribosomal proteins: synthesis and modification	ribosomal protein bS18	30S ribosomal protein S18	PROKKA_03190	0.615686	-0.699733
Biosynthesis of cofactors, prosthetic groups, and carriers	Pantothenate and coenzyme A	pantetheine-phosphate adenylyltransferase	Phosphopantetheine adenylyltransferase	PROKKA_00418	0.616529	-0.697759
No classification	Unknown function	-	hypothetical protein	PROKKA_04546	0.628815	-0.669293
Transport and binding proteins	Amino acids, peptides and amines	putative 2-aminoethylphosphonate ABC transporter, periplasmic 2-aminoethylphosphonate-binding protein	Putrescine-binding periplasmic protein precursor	PROKKA_03464	0.630095	-0.666359
Cellular processes	Chemotaxis and motility	flagellar hook-associated protein FlgK	Flagellar hook-associated protein 1	PROKKA_01778	0.631822	-0.662409
Energy metabolism	Amino acids and amines	maleylacetoacetate isomerase	Glutathione S-transferase GstB	PROKKA_01277	0.634592	-0.656099
Cellular processes	Adaptations to atypical conditions	-	Osmotically-inducible protein Y precursor	PROKKA_01105	0.634989	-0.655196
Energy metabolism	Pentose phosphate pathway	glucose-6-phosphate dehydrogenase	Glucose-6-phosphate 1-dehydrogenase	PROKKA_05652	0.654204	-0.612187
Energy metabolism	Electron transport	-	Electron transfer flavoprotein subunit alpha	PROKKA_02092	0.654244	-0.612099
No classification	Unknown function	-	hypothetical protein	PROKKA_01869	0.658474	-0.602803
Cellular processes	Chemotaxis and motility	-	Methyl-accepting chemotaxis protein PctB	PROKKA_02393	0.673185	-0.570926
DNA metabolism	DNA replication, recombination, and repair	integration host factor, beta subunit	DNA-binding protein HRm	PROKKA_01628	0.67706	-0.562645
No classification	No classification	-	Small-conductance mechanosensitive channel	PROKKA_05558	0.678403	-0.559785
Transport and binding proteins	Cations and iron carrying compounds	-	Iron-regulated protein A precursor	PROKKA_05636	0.679673	-0.557087
Purines, pyrimidines, nucleosides, and nucleotides	Purine ribonucleotide biosynthesis	adenylosuccinate synthase	Adenylosuccinate synthetase	PROKKA_03181	0.682138	-0.551865
No classification	Unknown function	-	hypothetical protein	PROKKA_01082	0.686171	-0.54336
No classification	Unknown function	-	hypothetical protein	PROKKA_04259	0.686293	-0.543103
Transport and binding proteins	Amino acids, peptides and amines	choline ABC transporter, periplasmic binding protein	Glycine betaine-binding periplasmic protein precursor	PROKKA_03021	0.688198	-0.539104
Purines, pyrimidines, nucleosides, and nucleotides	Purine ribonucleotide biosynthesis	phosphoribosylaminoimidazolesuccinocarboxamide synthase	Phosphoribosylaminoimidazole-succinocarboxamide synthase	PROKKA_02340	0.695901	-0.523046
Cell envelope	Other	lipoprotein, YaeC family	Methionine-binding lipoprotein MetQ precursor	PROKKA_00546	0.696629	-0.521537
Cellular processes	Detoxification	peroxiredoxin	Alkyl hydroperoxide reductase subunit C	PROKKA_05169	0.696656	-0.521482
Protein synthesis	tRNA aminoacylation	cysteine--tRNA ligase	Cysteine--tRNA ligase	PROKKA_02600	0.700556	-0.513428
Energy metabolism	TCA cycle	isocitrate dehydrogenase, NADP-dependent	Isocitrate dehydrogenase [NADP]	PROKKA_02649	0.709254	-0.495625
Protein fate	Protein folding and stabilization	-	periplasmic chaperone	PROKKA_04760	0.712826	-0.488378
No classification	No classification	-	Putative NAD(P)H nitroreductase	PROKKA_05133	0.713561	-0.486892
Protein synthesis	Translation factors	0	Translation initiation factor IF-2	PROKKA_03739	0.719817	-0.474298
No classification	Unknown function	TIGR00255 family protein	hypothetical protein	PROKKA_03330	0.72066	-0.472609
Protein synthesis	tRNA aminoacylation	aspartate--tRNA ligase	Aspartate--tRNA ligase	PROKKA_05566	0.724003	-0.465933
Energy metabolism	TCA cycle	aconitate hydratase 2	Aconitate hydratase 2	PROKKA_00154	0.729845	-0.454339
Purines, pyrimidines, nucleosides, and nucleotides	Other	-	Nucleoside diphosphate kinase	PROKKA_01476	0.735432	-0.443336
Protein synthesis	Ribosomal proteins: synthesis and modification	ribosomal protein uS9	30S ribosomal protein S9	PROKKA_01020	0.736528	-0.441188
Protein synthesis	Ribosomal proteins: synthesis and modification	ribosomal protein uS2	30S ribosomal protein S2	PROKKA_04769	0.740418	-0.433589
Energy metabolism	Glycolysis/gluconeogenesis	glyceraldehyde-3-phosphate dehydrogenase, type I	Glyceraldehyde-3-phosphate dehydrogenase 1	PROKKA_04647	0.743091	-0.42839
Transport and binding proteins	Amino acids, peptides and amines	putative 2-aminoethylphosphonate ABC transporter, periplasmic 2-aminoethylphosphonate-binding protein	Iron-utilization periplasmic protein precursor	PROKKA_03184	0.743115	-0.428343
Protein synthesis	tRNA aminoacylation	isoleucine--tRNA ligase	Isoleucine--tRNA ligase	PROKKA_03875	0.744345	-0.425957
Fatty acid and phospholipid metabolism	Biosynthesis	acetyl-CoA carboxylase, biotin carboxylase subunit	Biotin carboxylase	PROKKA_03267	0.752427	-0.410377
Protein synthesis	Ribosomal proteins: synthesis and modification	ribosomal protein bL21	50S ribosomal protein L21	PROKKA_04929	0.753109	-0.409069
Protein fate	Protein and peptide secretion and trafficking	protein-export chaperone SecB	Protein-export protein SecB	PROKKA_02998	0.754603	-0.406211
Amino acid biosynthesis	Pyruvate family	branched-chain amino acid aminotransferase	Branched-chain-amino-acid aminotransferase	PROKKA_02506	0.755498	-0.4045
Cell envelope	Biosynthesis and degradation of murein sacculus and peptidoglycan	cell shape determining protein, MreB/Mrl family	Rod shape-determining protein MreB	PROKKA_01039	0.767108	-0.382498
No classification	Unknown function	-	hypothetical protein	PROKKA_04331	0.774949	-0.367827
Transcription	Transcription factors	transcription termination factor Rho	hypothetical protein	PROKKA_03419	0.775556	-0.366698
Protein synthesis	Ribosomal proteins: synthesis and modification	ribosomal protein bL28	50S ribosomal protein L28	PROKKA_03342	0.777142	-0.36375
Cellular processes	Chemotaxis and motility	-	Chemotaxis protein CheW	PROKKA_01735	0.777778	-0.362569
Energy metabolism	Other	3-oxoadipate enol-lactonase	Non-heme chloroperoxidase	PROKKA_01450	0.778297	-0.361608
Energy metabolism	TCA cycle	oxoglutarate dehydrogenase (succinyl-transferring), E1 component	2-oxoglutarate dehydrogenase E1 component	PROKKA_00332	0.790728	-0.338746
Regulatory functions	DNA interactions	aminoethylphosphonate catabolism associated LysR family transcriptional regulator	HTH-type transcriptional regulator CysB	PROKKA_05362	0.792167	-0.336124
Biosynthesis of cofactors, prosthetic groups, and carriers	Heme, porphyrin, and cobalamin	5,6-dimethylbenzimidazole synthase	malonic semialdehyde reductase	PROKKA_02284	0.793082	-0.334457
Protein synthesis	Ribosomal proteins: synthesis and modification	ribosomal protein uS5	30S ribosomal protein S5	PROKKA_00039	0.797077	-0.32721
No classification	No classification	extracellular protein	hypothetical protein	PROKKA_02835	0.797343	-0.326728
Central intermediary metabolism	Other	succinate-semialdehyde dehydrogenase	Glutarate-semialdehyde dehydrogenase DavD	PROKKA_02946	0.801505	-0.319216
No classification	No classification	PQQ-dependent catabolism-associated beta-propeller protein	6-phosphogluconolactonase	PROKKA_04144	0.801975	-0.31837
Protein fate	Protein folding and stabilization	ATP-dependent protease HslVU, ATPase subunit	ATP-dependent protease ATPase subunit HslU	PROKKA_03061	0.807083	-0.30921
No classification	No classification	-	putative acyl-CoA thioester hydrolase	PROKKA_00486	0.812636	-0.299318
Biosynthesis of cofactors, prosthetic groups, and carriers	Pyridoxine	pyridoxine 5'-phosphate synthase	Pyridoxine 5'-phosphate synthase	PROKKA_01615	0.815417	-0.294389
Fatty acid and phospholipid metabolism	Biosynthesis	beta-hydroxyacyl-(acyl-carrier-protein) dehydratase FabA	3-hydroxydecanoyl-[acyl-carrier-protein] dehydratase	PROKKA_00313	0.820225	-0.285908
No classification	Unknown function	-	hypothetical protein	PROKKA_00576	0.823825	-0.27959
Energy metabolism	Amino acids and amines	pyridoxal phosphate-dependent enzymes, D-cysteine desulfhydrase family	D-cysteine desulfhydrase	PROKKA_02889	0.825237	-0.277119
Purines, pyrimidines, nucleosides, and nucleotides	Pyrimidine ribonucleotide biosynthesis	carbamoyl-phosphate synthase, small subunit	Carbamoyl-phosphate synthase small chain	PROKKA_03727	0.82615	-0.275525
No classification	No classification	-	Indole-3-glycerol phosphate synthase	PROKKA_04711	0.832486	-0.264502
Protein synthesis	tRNA aminoacylation	leucine--tRNA ligase	Leucine--tRNA ligase	PROKKA_03608	0.833793	-0.262239
Cell envelope	Surface structures	type IV pilus biogenesis/stability protein PilW	hypothetical protein	PROKKA_03768	0.843033	-0.246339
No classification	No classification	putative NAD(P)H quinone oxidoreductase, PIG3 family	Mycocerosic acid synthase	PROKKA_05765	0.843561	-0.245435
No classification	Unknown function	-	hypothetical protein	PROKKA_05606	0.84611	-0.241083
Biosynthesis of cofactors, prosthetic groups, and carriers	Riboflavin, FMN, and FAD	6,7-dimethyl-8-ribityllumazine synthase	6,7-dimethyl-8-ribityllumazine synthase	PROKKA_03547	0.869178	-0.202277
No classification	No classification	-	NAD-specific glutamate dehydrogenase	PROKKA_00138	0.870305	-0.200407
Amino acid biosynthesis	Glutamate family	argininosuccinate lyase	Argininosuccinate lyase 1	PROKKA_03386	0.870315	-0.20039
Transport and binding proteins	Amino acids, peptides and amines	putative 2-aminoethylphosphonate ABC transporter, ATP-binding protein	sn-glycerol-3-phosphate import ATP-binding protein UgpC	PROKKA_05648	0.870587	-0.199939
Amino acid biosynthesis	Serine family	phosphoserine transaminase	Phosphoserine aminotransferase	PROKKA_04490	0.871425	-0.198552
Cell envelope	Biosynthesis and degradation of surface polysaccharides and lipopolysaccharides	3-deoxy-8-phosphooctulonate synthase	2-dehydro-3-deoxyphosphooctonate aldolase	PROKKA_04750	0.874542	-0.193401
Energy metabolism	Electron transport	thioredoxin	Thioredoxin-1	PROKKA_03540	0.876612	-0.189989
Energy metabolism	Other	voltage-dependent potassium channel beta subunit	L-glyceraldehyde 3-phosphate reductase	PROKKA_01018	0.881172	-0.182504
Energy metabolism	Electron transport	azurin	Azurin precursor	PROKKA_03203	0.892246	-0.164487
No classification	No classification	redox-active disulfide protein 1	Thiol:disulfide interchange protein DsbA precursor	PROKKA_00532	0.892913	-0.163409
No classification	No classification	-	Dienelactone hydrolase family protein	PROKKA_00319	0.90301	-0.147186
Biosynthesis of cofactors, prosthetic groups, and carriers	Glutathione and analogs	glutathione synthase	Glutathione synthetase	PROKKA_00455	0.903772	-0.145969
Protein synthesis	Ribosomal proteins: synthesis and modification	ribosomal protein uS11	30S ribosomal protein S11	PROKKA_00044	0.909475	-0.136895
No classification	No classification	TIGR00730 family protein	LOG family protein YgdH	PROKKA_04466	0.910491	-0.135283
Transport and binding proteins	Amino acids, peptides and amines	lysine-arginine-ornithine-binding periplasmic protein	Lysine-arginine-ornithine-binding periplasmic protein precursor	PROKKA_01872	0.912927	-0.131429
Protein fate	Protein folding and stabilization	peptidyl-prolyl isomerase, gliding motility-associated	FKBP-type 22 kDa peptidyl-prolyl cis-trans isomerase	PROKKA_04587	0.913047	-0.131239
Energy metabolism	Glycolysis/gluconeogenesis	phosphopyruvate hydratase	Enolase	PROKKA_04749	0.913738	-0.130147
No classification	No classification	-	Pyrimidine-specific ribonucleoside hydrolase RihA	PROKKA_02782	0.914737	-0.128571
Protein fate	Degradation of proteins, peptides, and glycopeptides	aminopeptidase N	Aminopeptidase N	PROKKA_04162	0.916975	-0.125045
Purines, pyrimidines, nucleosides, and nucleotides	Nucleotide and nucleoside interconversions	adenylate kinase	Adenylate kinase	PROKKA_04797	0.924086	-0.113902
No classification	No classification	-	Thiol peroxidase	PROKKA_03960	0.929179	-0.105972
Cellular processes	Adaptations to atypical conditions	betaine-aldehyde dehydrogenase	NADP-dependent glyceraldehyde-3-phosphate dehydrogenase	PROKKA_02616	0.932516	-0.100799
Protein fate	Protein and peptide secretion and trafficking	preprotein translocase, SecA subunit	preprotein translocase subunit SecA	PROKKA_05551	0.937163	-0.0936287
Energy metabolism	Electron transport	ubiquinol oxidase, subunit II	Cytochrome bo(3) ubiquinol oxidase subunit 2 precursor	PROKKA_01528	0.937643	-0.0928887
Energy metabolism	Electron transport	electron transfer flavoprotein, mycofactocin-associated	Electron transfer flavoprotein subunit beta	PROKKA_02093	0.937849	-0.0925717
Regulatory functions	Transcription factors	phosphonate utilization associated transcriptional regulator	putative HTH-type transcriptional regulator YdfH	PROKKA_02008	0.939619	-0.0898529
Cellular processes	Chemotaxis and motility	-	Flagellar hook-associated protein 2	PROKKA_01773	0.939659	-0.089791
Protein fate	Protein modification and repair	methionine aminopeptidase, type I	Aminopeptidase	PROKKA_04617	0.94161	-0.0867987
Transport and binding proteins	Cations and iron carrying compounds	TonB-dependent copper receptor	Ferric enterobactin receptor precursor	PROKKA_03247	0.943343	-0.0841454
Protein fate	Degradation of proteins, peptides, and glycopeptides	HflK protein	Modulator of FtsH protease HflK	PROKKA_03178	0.946605	-0.0791657
Protein fate	Protein folding and stabilization	-	FKBP-type 22 kDa peptidyl-prolyl cis-trans isomerase	PROKKA_04925	0.950477	-0.0732756
No classification	No classification	membrane-bound PQQ-dependent dehydrogenase, glucose/quinate/shikimate family	Quinoprotein glucose dehydrogenase	PROKKA_01604	0.957153	-0.0631781
No classification	No classification	-	Tim44-like domain protein	PROKKA_00671	0.964671	-0.051891
No classification	Unknown function	-	hypothetical protein	PROKKA_01424	0.964812	-0.0516806
Cellular processes	Cell division	-	Chromosome partition protein Smc	PROKKA_05643	0.966071	-0.0497983
Protein synthesis	Ribosomal proteins: synthesis and modification	ribosomal protein bL20	50S ribosomal protein L20	PROKKA_02773	0.969238	-0.0450768
Amino acid biosynthesis	Glutamate family	formylmethanofuran dehydrogenase subunit C	Glutamate synthase [NADPH] large chain precursor	PROKKA_03077	0.973266	-0.0390939
Cellular processes	Adaptations to atypical conditions	-	DNA protection during starvation protein 2	PROKKA_05563	0.976995	-0.0335764
Transcription	Transcription factors	transcription termination factor NusA	hypothetical protein	PROKKA_03738	0.984564	-0.0224437
Fatty acid and phospholipid metabolism	Biosynthesis	acyl-CoA thioesterase II	Acyl-CoA thioesterase 2	PROKKA_03646	0.986874	-0.019062
Protein synthesis	tRNA aminoacylation	glutamate--tRNA ligase	Glutamate--tRNA ligase	PROKKA_01328	0.989909	-0.0146321
No classification	Unknown function	-	hypothetical protein	PROKKA_02030	1.00202	0.00291804
Energy metabolism	ATP-proton motive force interconversion	ATP synthase F1, gamma subunit	ATP synthase gamma chain	PROKKA_00630	1.00264	0.00380697
No classification	Unknown function	-	hypothetical protein	PROKKA_01913	1.01568	0.0224519
Transport and binding proteins	Cations and iron carrying compounds	nickel ABC transporter, nickel/metallophore periplasmic binding protein	Glutathione-binding protein GsiB precursor	PROKKA_04483	1.02155	0.0307634
Protein fate	Protein and peptide secretion and trafficking	outer membrane autotransporter barrel domain	Esterase EstA precursor	PROKKA_04708	1.02266	0.0323299
Fatty acid and phospholipid metabolism	Degradation	fatty oxidation complex, alpha subunit FadB	Fatty acid oxidation complex subunit alpha	PROKKA_02252	1.02279	0.0325123
No classification	Unknown function	-	hypothetical protein	PROKKA_02623	1.0238	0.0339381
Regulatory functions	Other	-	Ferric uptake regulation protein	PROKKA_03721	1.02406	0.0343004
Amino acid biosynthesis	Histidine family	ATP phosphoribosyltransferase, regulatory subunit	ATP phosphoribosyltransferase regulatory subunit	PROKKA_03180	1.0269	0.0382898
No classification	No classification	-	Inorganic pyrophosphatase	PROKKA_03570	1.02761	0.0392967
Protein synthesis	Ribosomal proteins: synthesis and modification	ribosomal protein uL10	50S ribosomal protein L10	PROKKA_00013	1.02881	0.0409719
Cell envelope	Other	-	Lipoteichoic acid synthase 1	PROKKA_04088	1.02949	0.0419313
Transcription	RNA processing	ribonuclease PH	Ribonuclease PH	PROKKA_03331	1.03076	0.043713
Energy metabolism	Other	glycolate oxidase, subunit GlcD	putative FAD-linked oxidoreductase	PROKKA_03482	1.03298	0.0468168
No classification	No classification	-	putative outer membrane lipoprotein	PROKKA_03316	1.04523	0.0638202
Transport and binding proteins	Amino acids, peptides and amines	lysine-arginine-ornithine-binding periplasmic protein	Cystine-binding periplasmic protein precursor	PROKKA_03036	1.04878	0.0687129
Protein synthesis	Ribosomal proteins: synthesis and modification	-	50S ribosomal protein L16 arginine hydroxylase	PROKKA_02642	1.05014	0.0705805
Cellular processes	Chemotaxis and motility	flagellar hook-associated protein 3	B-type flagellin	PROKKA_01775	1.051	0.0717688
Protein synthesis	Ribosomal proteins: synthesis and modification	ribosomal protein uS8	30S ribosomal protein S8	PROKKA_00036	1.05138	0.0722845
Protein synthesis	Translation factors	ribosome silencing factor	Ribosomal silencing factor RsfS	PROKKA_03593	1.05964	0.0835701
Transcription	DNA-dependent RNA polymerase	DNA-directed RNA polymerase, beta subunit	DNA-directed RNA polymerase subunit beta	PROKKA_00015	1.06069	0.0850046
No classification	Unknown function	-	hypothetical protein	PROKKA_05354	1.06326	0.08849
Protein fate	Degradation of proteins, peptides, and glycopeptides	oligoendopeptidase, M3 family	Oligopeptidase A	PROKKA_00566	1.06593	0.0921068
Cellular processes	Chemotaxis and motility	gliding motility-associated protein GldE	Magnesium and cobalt efflux protein CorC	PROKKA_03612	1.07229	0.100691
Transport and binding proteins	Amino acids, peptides and amines	choline ABC transporter, periplasmic binding protein	Glycine betaine-binding periplasmic protein precursor	PROKKA_04287	1.0751	0.104468
No classification	Unknown function	-	hypothetical protein	PROKKA_01470	1.08356	0.115785
Amino acid biosynthesis	Glutamate family	N-acetyl-gamma-glutamyl-phosphate reductase	N-acetyl-gamma-glutamyl-phosphate reductase	PROKKA_04721	1.08818	0.121913
Cell envelope	Biosynthesis and degradation of surface polysaccharides and lipopolysaccharides	polysaccharide chain length determinant protein, PEP-CTERM locus subfamily	Chain length determinant protein	PROKKA_04440	1.09266	0.127847
Energy metabolism	Glycolysis/gluconeogenesis	triose-phosphate isomerase	Triosephosphate isomerase	PROKKA_03736	1.09293	0.128202
Protein synthesis	Translation factors	translation elongation factor G	Elongation factor G 1	PROKKA_00019	1.10052	0.138183
Protein synthesis	Ribosomal proteins: synthesis and modification	ribosomal protein bS1	30S ribosomal protein S1	PROKKA_04495	1.10056	0.138235
Protein synthesis	Translation factors	translation initiation factor IF-3	Translation initiation factor IF-3	PROKKA_02775	1.10927	0.149609
Protein synthesis	Other	Obg family GTPase CgtA	GTPase Obg	PROKKA_04931	1.11753	0.16032
Amino acid biosynthesis	Pyruvate family	ketol-acid reductoisomerase	Ketol-acid reductoisomerase	PROKKA_03772	1.12199	0.166062
Amino acid biosynthesis	Histidine family	histidinol-phosphate transaminase	Aromatic-amino-acid aminotransferase	PROKKA_01326	1.12578	0.170923
Energy metabolism	Pentose phosphate pathway	6-phosphogluconate dehydrogenase (decarboxylating)	6-phosphogluconate dehydrogenase, NADP(+)-dependent, decarboxylating	PROKKA_04274	1.12833	0.174188
Energy metabolism	TCA cycle	citrate (Si)-synthase	Citrate synthase	PROKKA_00337	1.13946	0.188348
Cell envelope	Other	-	Outer membrane protein W precursor	PROKKA_03534	1.13961	0.188545
Transport and binding proteins	Other	Tol-Pal system beta propeller repeat protein TolB	translocation protein TolB	PROKKA_05575	1.14134	0.190734
Amino acid biosynthesis	Aspartate family	aspartate-semialdehyde dehydrogenase	Aspartate-semialdehyde dehydrogenase	PROKKA_05531	1.14266	0.192398
Cellular processes	Cell division	septum site-determining protein MinD	Septum site-determining protein MinD	PROKKA_04126	1.14767	0.198705
Biosynthesis of cofactors, prosthetic groups, and carriers	Menaquinone and ubiquinone	heptaprenyl diphosphate synthase component II	Farnesyl diphosphate synthase	PROKKA_03556	1.1515	0.203519
Protein synthesis	Ribosomal proteins: synthesis and modification	ribosomal protein uL11	50S ribosomal protein L11	PROKKA_00011	1.1541	0.206766
Energy metabolism	Other	2,3,4,5-tetrahydropyridine-2,6-dicarboxylate N-succinyltransferase	2,3,4,5-tetrahydropyridine-2,6-dicarboxylate N-succinyltransferase	PROKKA_04775	1.15546	0.208468
Energy metabolism	Other	voltage-dependent potassium channel beta subunit	L-glyceraldehyde 3-phosphate reductase	PROKKA_02886	1.15647	0.209727
Cell envelope	Biosynthesis and degradation of surface polysaccharides and lipopolysaccharides	cellulose synthase catalytic subunit (UDP-forming)	Glucans biosynthesis glucosyltransferase H	PROKKA_03034	1.16076	0.215072
Purines, pyrimidines, nucleosides, and nucleotides	2'-Deoxyribonucleotide metabolism	deoxycytidine triphosphate deaminase	Deoxycytidine triphosphate deaminase	PROKKA_04736	1.16093	0.215284
Central intermediary metabolism	Nitrogen fixation	nitrogen fixation protein NifM	Peptidyl-prolyl cis-trans isomerase C	PROKKA_04344	1.16194	0.216535
Protein fate	Degradation of proteins, peptides, and glycopeptides	putative ATP-dependent protease	Lon protease	PROKKA_03696	1.1685	0.224658
Protein synthesis	tRNA aminoacylation	tryptophan--tRNA ligase	Tryptophan--tRNA ligase	PROKKA_01014	1.17178	0.228706
Biosynthesis of cofactors, prosthetic groups, and carriers	Menaquinone and ubiquinone	ubiquinone biosynthesis hydroxylase, UbiH/UbiF/VisC/COQ6 family	2-octaprenylphenol hydroxylase	PROKKA_03437	1.17282	0.229984
No classification	No classification	-	LemA family protein	PROKKA_00051	1.17912	0.237716
Transcription	Transcription factors	RNA polymerase sigma factor RpoD	RNA polymerase sigma factor RpoD	PROKKA_04682	1.18313	0.242605
DNA metabolism	DNA replication, recombination, and repair	protein RecA	recombinase A	PROKKA_04882	1.18345	0.242996
Protein synthesis	tRNA aminoacylation	glycine--tRNA ligase, alpha subunit	Glycine--tRNA ligase alpha subunit	PROKKA_00604	1.18363	0.243214
Energy metabolism	Pentose phosphate pathway	transketolase	Transketolase 1	PROKKA_02418	1.18562	0.245642
Biosynthesis of cofactors, prosthetic groups, and carriers	Pyridine nucleotides	NAD+ synthetase	NH(3)-dependent NAD(+) synthetase	PROKKA_03204	1.19069	0.251798
Cellular processes	Adaptations to atypical conditions	-	Superoxide dismutase [Fe]	PROKKA_05639	1.19289	0.254464
Energy metabolism	Glycolysis/gluconeogenesis	-	Glucose-6-phosphate isomerase	PROKKA_03748	1.1937	0.255438
Purines, pyrimidines, nucleosides, and nucleotides	2'-Deoxyribonucleotide metabolism	ribonucleoside-diphosphate reductase, alpha subunit	Ribonucleoside-diphosphate reductase 1 subunit alpha	PROKKA_05100	1.19702	0.259451
Amino acid biosynthesis	Glutamate family	glutamine synthetase, type I	Glutamine synthetase	PROKKA_03005	1.20094	0.264168
Protein synthesis	tRNA aminoacylation	methionine--tRNA ligase	Methionine--tRNA ligase	PROKKA_04029	1.20121	0.264483
Protein synthesis	Ribosomal proteins: synthesis and modification	ribosomal protein uL1	50S ribosomal protein L1	PROKKA_00012	1.20455	0.268496
No classification	Unknown function	-	hypothetical protein	PROKKA_00123	1.21318	0.27879
Purines, pyrimidines, nucleosides, and nucleotides	Purine ribonucleotide biosynthesis	phosphoribosylaminoimidazole carboxylase, catalytic subunit	N5-carboxyaminoimidazole ribonucleotide mutase	PROKKA_00701	1.21452	0.280387
Cell envelope	Biosynthesis and degradation of surface polysaccharides and lipopolysaccharides	glucose-1-phosphate thymidylyltransferase	Glucose-1-phosphate thymidylyltransferase 2	PROKKA_02849	1.21557	0.281636
Purines, pyrimidines, nucleosides, and nucleotides	Purine ribonucleotide biosynthesis	phosphoribosylformylglycinamidine synthase	Phosphoribosylformylglycinamidine synthase	PROKKA_04963	1.21743	0.28384
Protein synthesis	tRNA aminoacylation	histidine--tRNA ligase	Histidine--tRNA ligase	PROKKA_01471	1.22322	0.290686
Protein synthesis	Ribosomal proteins: synthesis and modification	ribosomal protein uL15	50S ribosomal protein L15	PROKKA_00041	1.22446	0.292141
Energy metabolism	ATP-proton motive force interconversion	ATP synthase F1, beta subunit	ATP synthase subunit beta	PROKKA_00631	1.22642	0.294452
Protein fate	Protein folding and stabilization	-	heat shock protein GrpE	PROKKA_03723	1.23717	0.307049
Protein synthesis	Translation factors	translation elongation factor Ts	Elongation factor Ts	PROKKA_04768	1.24085	0.311326
Amino acid biosynthesis	Histidine family	ATP phosphoribosyltransferase	ATP phosphoribosyltransferase	PROKKA_01071	1.24848	0.320168
Cellular processes	Chemotaxis and motility	-	chemotaxis regulator CheZ	PROKKA_01743	1.25192	0.324146
Energy metabolism	Glycolysis/gluconeogenesis	phosphoglycerate mutase (2,3-diphosphoglycerate-independent)	2,3-bisphosphoglycerate-independent phosphoglycerate mutase	PROKKA_02995	1.25329	0.325724
No classification	Unknown function	-	hypothetical protein	PROKKA_01916	1.2536	0.326077
Protein synthesis	Translation factors	translation elongation factor P	Elongation factor P	PROKKA_05366	1.25404	0.326588
No classification	No classification	-	Putative reductase/y4119/YP_4011	PROKKA_04468	1.25971	0.33309
Protein fate	Protein folding and stabilization	ATP-dependent chaperone protein ClpB	Chaperone protein ClpB	PROKKA_03889	1.27268	0.347868
Cell envelope	Biosynthesis and degradation of surface polysaccharides and lipopolysaccharides	UDP-3-O-[3-hydroxymyristoyl] N-acetylglucosamine deacetylase	UDP-3-O-[3-hydroxymyristoyl] N-acetylglucosamine deacetylase	PROKKA_01125	1.27394	0.349303
Energy metabolism	Other	-	Glycerophosphoryl diester phosphodiesterase	PROKKA_05696	1.27406	0.349434
No classification	No classification	-	Putative uroporphyrinogen-III C-methyltransferase	PROKKA_03390	1.27762	0.353455
Regulatory functions	Other	GTP-binding protein TypA/BipA	GTP-binding protein TypA/BipA	PROKKA_03008	1.28286	0.359368
Energy metabolism	Glycolysis/gluconeogenesis	-	Phosphoglycerate kinase	PROKKA_02420	1.28677	0.363753
Protein synthesis	Ribosomal proteins: synthesis and modification	ribosomal protein bS6	30S ribosomal protein S6	PROKKA_03189	1.28692	0.363922
Amino acid biosynthesis	Aromatic amino acid family	tryptophan synthase, beta subunit	Tryptophan synthase beta chain	PROKKA_00578	1.29012	0.367506
Protein synthesis	Ribosomal proteins: synthesis and modification	ribosomal protein bL17	50S ribosomal protein L17	PROKKA_00047	1.29141	0.368944
Cellular processes	Detoxification	peroxiredoxin, OsmC subfamily	Peroxiredoxin OsmC	PROKKA_00572	1.29161	0.369175
Amino acid biosynthesis	Aspartate family	O-succinylhomoserine sulfhydrylase	O-succinylhomoserine sulfhydrylase	PROKKA_05541	1.29468	0.372591
Central intermediary metabolism	Other	4-aminobutyrate transaminase	5-aminovalerate aminotransferase DavT	PROKKA_02945	1.29547	0.373478
Energy metabolism	Biosynthesis and degradation of polysaccharides	glycogen debranching enzyme GlgX	Glycogen debranching enzyme	PROKKA_00229	1.29651	0.374631
Biosynthesis of cofactors, prosthetic groups, and carriers	Biotin	8-amino-7-oxononanoate synthase	Low specificity L-threonine aldolase	PROKKA_01888	1.29736	0.375575
Energy metabolism	ATP-proton motive force interconversion	ATP synthase F1, alpha subunit	ATP synthase subunit alpha	PROKKA_00629	1.30143	0.380103
Protein fate	Degradation of proteins, peptides, and glycopeptides	putative dipeptidase	Beta-Ala-Xaa dipeptidase	PROKKA_00281	1.3019	0.380616
No classification	No classification	-	PepSY-associated TM helix	PROKKA_03246	1.30348	0.382364
Energy metabolism	TCA cycle	isocitrate lyase	Isocitrate lyase	PROKKA_02639	1.30384	0.382767
Cellular processes	Adaptations to atypical conditions	-	Catalase	PROKKA_01449	1.32225	0.402994
Fatty acid and phospholipid metabolism	Biosynthesis	acetyl-CoA carboxylase, biotin carboxyl carrier protein	Biotin carboxyl carrier protein of acetyl-CoA carboxylase	PROKKA_03268	1.3228	0.403591
Cell envelope	Biosynthesis and degradation of surface polysaccharides and lipopolysaccharides	-	LPS-assembly lipoprotein RlpB	PROKKA_03607	1.32936	0.410736
Protein synthesis	Ribosomal proteins: synthesis and modification	ribosomal protein uL13	50S ribosomal protein L13	PROKKA_01019	1.33148	0.413027
Energy metabolism	Aerobic	succinate dehydrogenase and fumarate reductase iron-sulfur protein	Succinate dehydrogenase iron-sulfur subunit	PROKKA_00333	1.33526	0.417125
No classification	No classification	-	AsmA family protein	PROKKA_03745	1.33709	0.419101
Energy metabolism	Other	-	NADP-dependent malic enzyme	PROKKA_03068	1.33714	0.419148
No classification	No classification	-	Ankyrin repeats (3 copies)	PROKKA_04091	1.34063	0.422914
Amino acid biosynthesis	Serine family	phosphoserine phosphatase SerB	Phosphoserine phosphatase	PROKKA_03160	1.34185	0.424225
Cellular processes	Adaptations to atypical conditions	-	Osmotically-inducible protein Y precursor	PROKKA_03744	1.34514	0.427759
Protein fate	Protein and peptide secretion and trafficking	outer membrane assembly lipoprotein YfiO	Outer membrane protein assembly factor BamD precursor	PROKKA_03886	1.34626	0.428958
No classification	No classification	-	Imelysin	PROKKA_04656	1.35862	0.442141
Central intermediary metabolism	Nitrogen metabolism	nitrite reductase [NAD(P)H], large subunit	Rubredoxin-NAD(+) reductase	PROKKA_00721	1.36631	0.450284
Purines, pyrimidines, nucleosides, and nucleotides	Purine ribonucleotide biosynthesis	phosphoribosylamine--glycine ligase	Phosphoribosylamine--glycine ligase	PROKKA_03261	1.36981	0.453977
Biosynthesis of cofactors, prosthetic groups, and carriers	Menaquinone and ubiquinone	3-demethylubiquinone-9 3-O-methyltransferase	Ubiquinone biosynthesis O-methyltransferase	PROKKA_04486	1.37018	0.454361
Amino acid biosynthesis	Aromatic amino acid family	shikimate dehydrogenase	Carboxynorspermidine synthase	PROKKA_04321	1.37098	0.455208
Energy metabolism	Glycolysis/gluconeogenesis	pyruvate kinase	Pyruvate kinase II	PROKKA_04632	1.37902	0.463646
Energy metabolism	Amino acids and amines	glycine dehydrogenase	Glycine dehydrogenase (decarboxylating)	PROKKA_05602	1.38015	0.464826
Transcription	DNA-dependent RNA polymerase	DNA-directed RNA polymerase, alpha subunit	DNA-directed RNA polymerase subunit alpha	PROKKA_00046	1.38176	0.466508
Protein synthesis	Ribosomal proteins: synthesis and modification	ribosomal protein bL25, Ctc-form	50S ribosomal protein L25	PROKKA_03838	1.38237	0.467143
Energy metabolism	TCA cycle	succinate-CoA ligase, beta subunit	Succinyl-CoA ligase [ADP-forming] subunit beta	PROKKA_00329	1.38502	0.469906
Amino acid biosynthesis	Aspartate family	aspartate kinase	Aspartokinase	PROKKA_01890	1.38865	0.473685
Protein fate	Protein folding and stabilization	peptidase Do	hypothetical protein	PROKKA_04323	1.3902	0.475291
Protein synthesis	Ribosomal proteins: synthesis and modification	ribosomal protein uS13	30S ribosomal protein S13	PROKKA_00043	1.39526	0.48053
Amino acid biosynthesis	Serine family	cysteine synthase A	Cysteine synthase A	PROKKA_02265	1.39869	0.484074
Energy metabolism	ATP-proton motive force interconversion	ATP synthase F1, epsilon subunit	ATP synthase epsilon chain	PROKKA_00632	1.40802	0.493666
Protein fate	Protein and peptide secretion and trafficking	protein-export membrane protein SecD	preprotein translocase subunit SecD	PROKKA_01490	1.41129	0.497018
Energy metabolism	Pyruvate dehydrogenase	dihydrolipoyl dehydrogenase	Dihydrolipoamide dehydrogenase	PROKKA_00330	1.41396	0.49974
Biosynthesis of cofactors, prosthetic groups, and carriers	Menaquinone and ubiquinone	solanesyl diphosphate synthase	Octaprenyl-diphosphate synthase	PROKKA_04928	1.41468	0.500472
Biosynthesis of cofactors, prosthetic groups, and carriers	Heme, porphyrin, and cobalamin	hydroxymethylbilane synthase	Porphobilinogen deaminase	PROKKA_03388	1.4229	0.508832
Transcription	Degradation of RNA	polyribonucleotide nucleotidyltransferase	Polyribonucleotide nucleotidyltransferase	PROKKA_03743	1.42324	0.509179
Energy metabolism	TCA cycle	malate dehydrogenase (acceptor)	Malate:quinone oxidoreductase	PROKKA_04460	1.42627	0.512243
No classification	Unknown function	-	hypothetical protein	PROKKA_03272	1.4294	0.515405
Cell envelope	Biosynthesis and degradation of surface polysaccharides and lipopolysaccharides	dTDP-4-dehydrorhamnose 3,5-epimerase	dTDP-4-dehydrorhamnose 3,5-epimerase	PROKKA_02850	1.4344	0.520445
No classification	No classification	-	Porin-like protein NicP precursor	PROKKA_03451	1.43461	0.520654
No classification	Unknown function	-	hypothetical protein	PROKKA_01007	1.43494	0.52099
Protein synthesis	Ribosomal proteins: synthesis and modification	ribosomal protein uL18	50S ribosomal protein L18	PROKKA_00038	1.43799	0.524057
Protein fate	Protein folding and stabilization	chaperonin GroL	60 kDa chaperonin	PROKKA_04665	1.44029	0.526361
Amino acid biosynthesis	Aromatic amino acid family	tryptophan synthase, alpha subunit	Tryptophan synthase alpha chain	PROKKA_00579	1.44181	0.527885
Protein synthesis	Ribosomal proteins: synthesis and modification	ribosomal protein bL19	50S ribosomal protein L19	PROKKA_04985	1.44262	0.528687
Cellular processes	Detoxification	peroxiredoxin	putative peroxiredoxin	PROKKA_04038	1.44313	0.529197
Fatty acid and phospholipid metabolism	Biosynthesis	3-oxoacyl-[acyl-carrier-protein] reductase	3-oxoacyl-[acyl-carrier-protein] reductase FabG	PROKKA_05079	1.44456	0.530628
Energy metabolism	Sugars	fructose-bisphosphate aldolase, class II, Calvin cycle subtype	Fructose-bisphosphate aldolase	PROKKA_02423	1.44539	0.531459
No classification	No classification	-	NADP-specific glutamate dehydrogenase	PROKKA_03691	1.44903	0.535083
Purines, pyrimidines, nucleosides, and nucleotides	Pyrimidine ribonucleotide biosynthesis	dihydroorotase, homodimeric type	Dihydroorotase	PROKKA_04036	1.45346	0.539492
Cell envelope	Biosynthesis and degradation of surface polysaccharides and lipopolysaccharides	dTDP-4-dehydrorhamnose reductase	dTDP-4-dehydrorhamnose reductase	PROKKA_02851	1.45669	0.542694
Protein fate	Protein folding and stabilization	trigger factor	Trigger factor	PROKKA_02542	1.45677	0.542777
No classification	No classification	leukotriene B4 12-hydroxydehydrogenase/15-oxo-prostaglandin 13-reductase	NADPH-dependent curcumin reductase	PROKKA_01991	1.45883	0.544809
Cellular processes	Cell division	chromosome segregation protein SMC	Methyl-accepting chemotaxis protein McpS	PROKKA_04924	1.45936	0.545332
Protein synthesis	Ribosomal proteins: synthesis and modification	ribosomal protein uL2	50S ribosomal protein L2	PROKKA_00025	1.46274	0.548674
Cell envelope	Biosynthesis and degradation of murein sacculus and peptidoglycan	UDP-N-acetylmuramyl-tripeptide synthetase	UDP-N-acetylmuramoyl-L-alanyl-D-glutamate--2,6-diaminopimelate ligase	PROKKA_01114	1.46504	0.550944
Protein synthesis	Ribosomal proteins: synthesis and modification	ribosomal protein bL12	50S ribosomal protein L7/L12	PROKKA_00014	1.47014	0.555949
Purines, pyrimidines, nucleosides, and nucleotides	Nucleotide and nucleoside interconversions	cytidylate kinase	Cytidylate kinase	PROKKA_04494	1.4749	0.560618
No classification	Unknown function	-	hypothetical protein	PROKKA_03698	1.47523	0.560936
Central intermediary metabolism	Other	4-aminobutyrate transaminase	Diaminobutyrate--2-oxoglutarate aminotransferase	PROKKA_04061	1.47597	0.561664
Energy metabolism	Electron transport	thioredoxin-disulfide reductase	Glucosaminate ammonia-lyase	PROKKA_04938	1.47637	0.562052
Purines, pyrimidines, nucleosides, and nucleotides	Pyrimidine ribonucleotide biosynthesis	carbamoyl-phosphate synthase, large subunit	Carbamoyl-phosphate synthase large chain	PROKKA_03728	1.47838	0.564018
Regulatory functions	DNA interactions	global nitrogen regulator NtcA	Transcriptional activator protein Anr	PROKKA_01987	1.48022	0.565812
No classification	Unknown function	-	hypothetical protein	PROKKA_04556	1.49186	0.577108
Protein synthesis	Ribosomal proteins: synthesis and modification	ribosomal protein uS10	30S ribosomal protein S10	PROKKA_00021	1.49701	0.582085
Protein fate	Degradation of proteins, peptides, and glycopeptides	intracellular protease, PfpI family	General stress protein 18	PROKKA_04332	1.49974	0.584708
Biosynthesis of cofactors, prosthetic groups, and carriers	Other	coenzyme PQQ biosynthesis protein PqqF	Protease 3 precursor	PROKKA_00427	1.50259	0.587447
Purines, pyrimidines, nucleosides, and nucleotides	Purine ribonucleotide biosynthesis	phosphoribosylformylglycinamidine cyclo-ligase	Phosphoribosylformylglycinamidine cyclo-ligase	PROKKA_01914	1.50703	0.591712
Purines, pyrimidines, nucleosides, and nucleotides	Purine ribonucleotide biosynthesis	amidophosphoribosyltransferase	Amidophosphoribosyltransferase	PROKKA_05540	1.50893	0.593525
Energy metabolism	TCA cycle	succinate-CoA ligase, alpha subunit	Succinyl-CoA ligase [ADP-forming] subunit alpha	PROKKA_00328	1.5188	0.60293
DNA metabolism	DNA replication, recombination, and repair	ATP-dependent DNA helicase RecQ	ATP-dependent RNA helicase RhlE	PROKKA_00481	1.5212	0.605205
No classification	Unknown function	-	hypothetical protein	PROKKA_00323	1.52422	0.60807
Purines, pyrimidines, nucleosides, and nucleotides	Purine ribonucleotide biosynthesis	adenylosuccinate lyase	Adenylosuccinate lyase	PROKKA_02643	1.52614	0.609886
Cell envelope	Other	peptidoglycan-associated lipoprotein	Outer membrane porin F precursor	PROKKA_02028	1.52716	0.610853
Central intermediary metabolism	Nitrogen metabolism	creatininase	Creatinine amidohydrolase	PROKKA_04311	1.5376	0.620681
Energy metabolism	Electron transport	cytochrome c oxidase, cbb3-type, subunit III	Gluconate 2-dehydrogenase cytochrome c subunit precursor	PROKKA_00561	1.53763	0.620712
Protein fate	Degradation of proteins, peptides, and glycopeptides	C-terminal processing peptidase	Tail-specific protease precursor	PROKKA_04593	1.53772	0.620789
Cell envelope	Biosynthesis and degradation of murein sacculus and peptidoglycan	lytic murein transglycosylase B	Membrane-bound lytic murein transglycosylase B precursor	PROKKA_03597	1.54244	0.625217
Protein synthesis	Ribosomal proteins: synthesis and modification	ribosomal protein uL6	50S ribosomal protein L6	PROKKA_00037	1.54667	0.629165
No classification	Unknown function	-	hypothetical protein	PROKKA_04306	1.564	0.645243
Fatty acid and phospholipid metabolism	Biosynthesis	acetyl-CoA carboxylase, carboxyl transferase, alpha subunit	Acetyl-coenzyme A carboxylase carboxyl transferase subunit alpha	PROKKA_04753	1.56876	0.649629
Energy metabolism	Pyruvate dehydrogenase	pyruvate dehydrogenase (acetyl-transferring), homodimeric type	Pyruvate dehydrogenase E1 component	PROKKA_03120	1.57262	0.653173
Protein fate	Protein folding and stabilization	chaperone protein DnaK	Chaperone protein DnaK	PROKKA_03724	1.57264	0.653192
Protein synthesis	Translation factors	translation elongation factor Tu	Elongation factor Tu	PROKKA_00020	1.57776	0.657875
Protein synthesis	Ribosomal proteins: synthesis and modification	ribosomal protein uL5	50S ribosomal protein L5	PROKKA_00034	1.58122	0.661037
Amino acid biosynthesis	Aspartate family	4-hydroxy-tetrahydrodipicolinate synthase	4-hydroxy-tetrahydrodipicolinate synthase	PROKKA_02343	1.58576	0.665175
Amino acid biosynthesis	Histidine family	1-(5-phosphoribosyl)-5-[(5-phosphoribosylamino)methylideneamino]imidazole-4-carboxamide isomerase	1-(5-phosphoribosyl)-5-[(5-phosphoribosylamino)methylideneamino] imidazole-4-carboxamide isomerase	PROKKA_02989	1.58676	0.666083
Purines, pyrimidines, nucleosides, and nucleotides	Other	AMP nucleosidase	AMP nucleosidase	PROKKA_03623	1.59243	0.671231
Protein synthesis	tRNA aminoacylation	arginine--tRNA ligase	Arginine--tRNA ligase	PROKKA_03064	1.60488	0.682465
Cell envelope	Other	peptidoglycan-associated lipoprotein	Outer membrane porin F precursor	PROKKA_04804	1.60818	0.68543
Energy metabolism	Pentose phosphate pathway	transaldolase	Transaldolase	PROKKA_02220	1.60899	0.686155
Central intermediary metabolism	Nitrogen fixation	nitrogen fixation protein NifM	Peptidyl-prolyl cis-trans isomerase D	PROKKA_02547	1.60952	0.686634
Energy metabolism	Pentose phosphate pathway	ribose 5-phosphate isomerase A	Ribose-5-phosphate isomerase A	PROKKA_03487	1.61412	0.690747
Protein synthesis	Ribosomal proteins: synthesis and modification	50S ribosomal protein uL3	50S ribosomal protein L3	PROKKA_00022	1.62167	0.697481
Protein fate	Protein and peptide secretion and trafficking	signal peptidase I	Signal peptidase I	PROKKA_01619	1.63184	0.7065
Energy metabolism	Electron transport	NADH dehydrogenase (quinone), D subunit	NADH-quinone oxidoreductase subunit C/D	PROKKA_02636	1.63256	0.707132
Protein fate	Degradation of proteins, peptides, and glycopeptides	putative carboxyl-terminal-processing protease, deltaproteobacterial	Carboxy-terminal processing protease CtpB precursor	PROKKA_02993	1.63642	0.710541
Cell envelope	Other	-	Outer membrane protein assembly factor BamC	PROKKA_02342	1.6428	0.716159
Energy metabolism	Glycolysis/gluconeogenesis	phosphoenolpyruvate carboxykinase (ATP)	Phosphoenolpyruvate carboxykinase [ATP]	PROKKA_02870	1.64421	0.717394
Protein fate	Protein folding and stabilization	-	10 kDa chaperonin	PROKKA_04666	1.64822	0.720911
Energy metabolism	Pentose phosphate pathway	ribulose-phosphate 3-epimerase	Ribulose-phosphate 3-epimerase	PROKKA_04705	1.65295	0.725045
No classification	No classification	-	Porin D precursor	PROKKA_02842	1.65473	0.726598
Cellular processes	Cell division	cell division protein ZipA	Cell division protein ZipA	PROKKA_02001	1.673	0.742434
Protein synthesis	Ribosomal proteins: synthesis and modification	ribosomal protein uS7	30S ribosomal protein S7	PROKKA_00018	1.67393	0.743239
No classification	No classification	-	PhoH-like protein	PROKKA_01698	1.67397	0.743271
Energy metabolism	TCA cycle	dihydrolipoyllysine-residue succinyltransferase, E2 component of oxoglutarate dehydrogenase (succinyl-transferring) complex	Dihydrolipoyllysine-residue succinyltransferase component of 2-oxoglutarate dehydrogenase complex	PROKKA_00331	1.68701	0.754472
Cellular processes	Adaptations to atypical conditions	-	heat-inducible protein	PROKKA_00253	1.68804	0.755353
Energy metabolism	TCA cycle	fumarate hydratase, class II	Fumarate hydratase class II	PROKKA_01237	1.68905	0.756208
Protein fate	Degradation of proteins, peptides, and glycopeptides	-	Peptidase M16 inactive domain protein	PROKKA_00426	1.69791	0.763756
Protein fate	Protein folding and stabilization	peptidase Do	putative periplasmic serine endoprotease DegP-like precursor	PROKKA_02348	1.69889	0.764592
Protein synthesis	tRNA aminoacylation	glutamine--tRNA ligase	Glutamine--tRNA ligase	PROKKA_02599	1.71411	0.777461
Cellular processes	Chemotaxis and motility	flagellar hook-basal body protein	Flagellar hook protein FlgE	PROKKA_05101	1.71805	0.780768
Protein fate	Protein and peptide secretion and trafficking	preprotein translocase, YajC subunit	preprotein translocase subunit YajC	PROKKA_01491	1.72284	0.784786
Cell envelope	Biosynthesis and degradation of surface polysaccharides and lipopolysaccharides	-	Glucans biosynthesis protein G precursor	PROKKA_03033	1.72542	0.786949
Energy metabolism	TCA cycle	succinate dehydrogenase, flavoprotein subunit	Succinate dehydrogenase flavoprotein subunit	PROKKA_00334	1.72631	0.787695
Transport and binding proteins	Unknown substrate	efflux transporter, RND family, MFP subunit	Macrolide export protein MacA	PROKKA_02904	1.73282	0.793122
No classification	No classification	-	Tetratricopeptide repeat protein	PROKKA_02865	1.73286	0.793157
Protein synthesis	Ribosomal proteins: synthesis and modification	50S ribosomal protein uL4	50S ribosomal protein L4	PROKKA_00023	1.73531	0.795197
Transcription	DNA-dependent RNA polymerase	DNA-directed RNA polymerase, beta' subunit	DNA-directed RNA polymerase subunit beta'	PROKKA_00016	1.74628	0.804284
Purines, pyrimidines, nucleosides, and nucleotides	Purine ribonucleotide biosynthesis	GMP synthase (glutamine-hydrolyzing), C-terminal domain	GMP synthase [glutamine-hydrolyzing]	PROKKA_01457	1.74988	0.80726
Protein synthesis	Ribosomal proteins: synthesis and modification	ribosomal protein uL23	50S ribosomal protein L23	PROKKA_00024	1.75532	0.811735
Protein synthesis	tRNA aminoacylation	alanine--tRNA ligase	Alanine--tRNA ligase	PROKKA_01889	1.75719	0.813271
Energy metabolism	Other	voltage-dependent potassium channel beta subunit	L-glyceraldehyde 3-phosphate reductase	PROKKA_05189	1.76235	0.8175
Cell envelope	Biosynthesis and degradation of murein sacculus and peptidoglycan	-	D-alanyl-D-alanine carboxypeptidase DacC precursor	PROKKA_03599	1.76239	0.817534
Purines, pyrimidines, nucleosides, and nucleotides	Purine ribonucleotide biosynthesis	inosine-5'-monophosphate dehydrogenase	Inosine-5'-monophosphate dehydrogenase	PROKKA_01458	1.76951	0.823346
Cellular processes	Adaptations to atypical conditions	-	Glycine betaine/carnitine/choline-binding protein OpuCC precursor	PROKKA_00991	1.77005	0.823789
Biosynthesis of cofactors, prosthetic groups, and carriers	Other	2-C-methyl-D-erythritol 2,4-cyclodiphosphate synthase	2-C-methyl-D-erythritol 2,4-cyclodiphosphate synthase	PROKKA_04743	1.77305	0.826232
Protein synthesis	tRNA aminoacylation	lysine--tRNA ligase	Lysine--tRNA ligase, heat inducible	PROKKA_04810	1.77635	0.828913
Protein fate	Degradation of proteins, peptides, and glycopeptides	-	Peptidase inhibitor I78 family protein	PROKKA_02779	1.79107	0.840825
Energy metabolism	Amino acids and amines	carbamate kinase	Carbamate kinase 2	PROKKA_05607	1.79889	0.847104
Protein fate	Protein folding and stabilization	-	Chaperone protein HtpG	PROKKA_00320	1.81036	0.856276
Central intermediary metabolism	Nitrogen fixation	nitrogen fixation protein NifM	Chaperone SurA precursor	PROKKA_04698	1.81545	0.860324
Protein fate	Protein and peptide secretion and trafficking	membrane protein insertase, YidC/Oxa1 family, N-terminal domain	Membrane protein insertase YidC	PROKKA_00615	1.82304	0.866345
Transport and binding proteins	Unknown substrate	efflux transporter, RND family, MFP subunit	putative efflux pump periplasmic linker TtgA precursor	PROKKA_00071	1.82343	0.866656
Protein synthesis	tRNA aminoacylation	tyrosine--tRNA ligase	Tyrosine--tRNA ligase	PROKKA_04725	1.83027	0.872053
Protein synthesis	Ribosomal proteins: synthesis and modification	ribosomal protein uL24	50S ribosomal protein L24	PROKKA_00033	1.83855	0.878565
Fatty acid and phospholipid metabolism	Biosynthesis	beta-ketoacyl-acyl-carrier-protein synthase II	3-oxoacyl-[acyl-carrier-protein] synthase 1	PROKKA_00314	1.8391	0.879002
Amino acid biosynthesis	Aspartate family	methionine synthase	Methionine synthase	PROKKA_04180	1.8418	0.881114
Protein synthesis	Ribosomal proteins: synthesis and modification	ribosomal protein uL22	50S ribosomal protein L22	PROKKA_00027	1.84822	0.886133
Energy metabolism	ATP-proton motive force interconversion	ATP synthase F0, B subunit	ATP synthase subunit b	PROKKA_00627	1.85534	0.891685
Energy metabolism	TCA cycle	aconitate hydratase 1	Aconitate hydratase 1	PROKKA_02263	1.8588	0.89437
Protein fate	Protein and peptide secretion and trafficking	signal recognition particle-docking protein FtsY	Signal recognition particle receptor FtsY	PROKKA_00428	1.86178	0.89668
Cell envelope	Biosynthesis and degradation of murein sacculus and peptidoglycan	-	Penicillin-binding protein activator LpoA precursor	PROKKA_01108	1.86254	0.897275
Protein synthesis	tRNA aminoacylation	methionyl-tRNA formyltransferase	Methionyl-tRNA formyltransferase	PROKKA_00598	1.86318	0.897769
Protein synthesis	tRNA aminoacylation	aspartyl/glutamyl-tRNA(Asn/Gln) amidotransferase, A subunit	Glutamyl-tRNA(Gln) amidotransferase subunit A	PROKKA_01037	1.86831	0.901737
No classification	No classification	heme biosynthesis-associated TPR protein	putative protoheme IX biogenesis protein	PROKKA_03391	1.87655	0.90808
Fatty acid and phospholipid metabolism	Biosynthesis	3-oxoacyl-[acyl-carrier-protein] reductase	Cyclopentanol dehydrogenase	PROKKA_01305	1.90751	0.931688
Purines, pyrimidines, nucleosides, and nucleotides	Pyrimidine ribonucleotide biosynthesis	dihydroorotase, multifunctional complex type	Dihydroorotase	PROKKA_00449	1.90939	0.93311
Energy metabolism	Sugars	phosphoglucomutase, alpha-D-glucose phosphate-specific	Phosphoglucomutase	PROKKA_00823	1.91202	0.935096
Energy metabolism	Pyruvate dehydrogenase	dihydrolipoyllysine-residue acetyltransferase	Dihydrolipoyllysine-residue acetyltransferase component of pyruvate dehydrogenase complex	PROKKA_03119	1.93046	0.948946
Cell envelope	Biosynthesis and degradation of surface polysaccharides and lipopolysaccharides	UTP--glucose-1-phosphate uridylyltransferase	UTP--glucose-1-phosphate uridylyltransferase	PROKKA_05165	1.93276	0.95066
Protein synthesis	Ribosomal proteins: synthesis and modification	ribosomal protein bL9	50S ribosomal protein L9	PROKKA_03192	1.93875	0.955123
Protein fate	Degradation of proteins, peptides, and glycopeptides	-	Metalloprotease LoiP precursor	PROKKA_01089	1.94183	0.957415
Cellular processes	Pathogenesis	-	Bacterial virulence protein (VirJ)	PROKKA_04999	1.95621	0.968064
Cell envelope	Biosynthesis and degradation of surface polysaccharides and lipopolysaccharides	dTDP-glucose 4,6-dehydratase	dTDP-glucose 4,6-dehydratase 2	PROKKA_02848	1.95832	0.969615
Amino acid biosynthesis	Serine family	phosphoglycerate dehydrogenase	D-3-phosphoglycerate dehydrogenase	PROKKA_03481	1.95992	0.970797
Energy metabolism	Amino acids and amines	glycine cleavage system T protein	Aminomethyltransferase	PROKKA_05600	1.9858	0.98972
Protein fate	Protein and peptide secretion and trafficking	type I secretion outer membrane protein, TolC family	Outer membrane efflux protein BepC precursor	PROKKA_04532	1.99564	0.996855
No classification	No classification	TIGR02099 family protein	putative assembly protein	PROKKA_02984	1.99631	0.997339
No classification	Unknown function	conserved hypothetical protein	hypothetical protein	PROKKA_05657	1.99796	0.998531
Central intermediary metabolism	Other	methionine adenosyltransferase	S-adenosylmethionine synthase	PROKKA_02416	2.00749	1.0054
Cell envelope	Other	putative membrane-bound dehydrogenase domain	Membrane bound L-sorbosone dehydrogenase	PROKKA_00195	2.00857	1.00617
Energy metabolism	Other	pyranose oxidase	Gluconate 2-dehydrogenase flavoprotein precursor	PROKKA_00562	2.01683	1.01209
Protein fate	Protein folding and stabilization	ATP-dependent Clp protease, ATP-binding subunit ClpX	ATP-dependent Clp protease ATP-binding subunit ClpX	PROKKA_02544	2.02018	1.01448
Protein synthesis	tRNA aminoacylation	methionyl-tRNA formyltransferase	Bifunctional polymyxin resistance protein ArnA	PROKKA_05231	2.04111	1.02936
Biosynthesis of cofactors, prosthetic groups, and carriers	Thiamine	phosphomethylpyrimidine synthase	Phosphomethylpyrimidine synthase	PROKKA_03147	2.07495	1.05307
Amino acid biosynthesis	Aromatic amino acid family	shikimate dehydrogenase	Shikimate dehydrogenase	PROKKA_00590	2.10562	1.07424
Protein synthesis	Ribosomal proteins: synthesis and modification	ribosomal protein uL14	50S ribosomal protein L14	PROKKA_00032	2.11653	1.0817
Energy metabolism	Sugars	lactaldehyde reductase	Alcohol dehydrogenase 2	PROKKA_02382	2.11775	1.08253
Central intermediary metabolism	Nitrogen metabolism	nitrogen regulation protein NR(I)	Photosynthetic apparatus regulatory protein RegA	PROKKA_01010	2.13214	1.0923
Energy metabolism	Electron transport	NADH dehydrogenase (quinone), G subunit	NADH-quinone oxidoreductase subunit G	PROKKA_02633	2.13222	1.09235
Cell envelope	Biosynthesis and degradation of murein sacculus and peptidoglycan	UDP-N-acetylglucosamine 1-carboxyvinyltransferase	UDP-N-acetylglucosamine 1-carboxyvinyltransferase	PROKKA_01070	2.1418	1.09882
Purines, pyrimidines, nucleosides, and nucleotides	Purine ribonucleotide biosynthesis	phosphoribosylaminoimidazolecarboxamide formyltransferase/IMP cyclohydrolase	Bifunctional purine biosynthesis protein PurH	PROKKA_03262	2.15036	1.10458
Amino acid biosynthesis	Glutamate family	ornithine carbamoyltransferase	Ornithine carbamoyltransferase, catabolic	PROKKA_05608	2.1634	1.1133
Cell envelope	Biosynthesis and degradation of murein sacculus and peptidoglycan	lytic murein transglycosylase	Membrane-bound lytic murein transglycosylase B precursor	PROKKA_03604	2.17409	1.12041
No classification	Unknown function	-	hypothetical protein	PROKKA_04803	2.1778	1.12287
Protein synthesis	tRNA and rRNA base modification	tRNA pseudouridine(55) synthase	tRNA pseudouridine synthase B	PROKKA_03741	2.18981	1.13081
Transcription	Degradation of RNA	ribonuclease, Rne/Rng family	Ribonuclease E	PROKKA_05088	2.19651	1.13521
Central intermediary metabolism	Polyamine biosynthesis	arginine decarboxylase	Biosynthetic arginine decarboxylase	PROKKA_03275	2.22627	1.15463
No classification	No classification	GTP-binding protein YchF	Ribosome-binding ATPase YchF	PROKKA_03836	2.24701	1.16801
Biosynthesis of cofactors, prosthetic groups, and carriers	Heme, porphyrin, and cobalamin	-	Delta-aminolevulinic acid dehydratase	PROKKA_04383	2.25023	1.17007
Protein fate	Protein and peptide secretion and trafficking	outer membrane protein assembly complex, YaeT protein	Outer membrane protein assembly factor BamA precursor	PROKKA_04761	2.28289	1.19086
Cellular processes	Biosynthesis of natural products	fluorothreonine transaldolase	Serine hydroxymethyltransferase 2	PROKKA_03681	2.28834	1.1943
Transport and binding proteins	Carbohydrates, organic alcohols, and acids	polysaccharide export protein, MPA1 family	LPS O-antigen length regulator	PROKKA_04499	2.29699	1.19974
Fatty acid and phospholipid metabolism	Biosynthesis	3-hydroxybutyrate dehydrogenase	putative oxidoreductase YciK	PROKKA_04484	2.31504	1.21104
Protein fate	Protein and peptide secretion and trafficking	outer membrane assembly lipoprotein YfgL	Outer membrane protein assembly factor BamB precursor	PROKKA_01469	2.33033	1.22053
Energy metabolism	Sugars	-	Fructose-1,6-bisphosphatase class 1	PROKKA_03013	2.34969	1.23247
Amino acid biosynthesis	Pyruvate family	2-isopropylmalate synthase	2-isopropylmalate synthase	PROKKA_01465	2.36253	1.24033
No classification	Unknown function	-	hypothetical protein	PROKKA_05590	2.37519	1.24804
Protein synthesis	tRNA and rRNA base modification	16S rRNA (cytosine(1402)-N(4))-methyltransferase	Ribosomal RNA small subunit methyltransferase H	PROKKA_01111	2.39812	1.2619
Energy metabolism	Electron transport	-	Cytochrome b/c1	PROKKA_01023	2.41654	1.27294
Purines, pyrimidines, nucleosides, and nucleotides	Purine ribonucleotide biosynthesis	ribose-phosphate diphosphokinase	Ribose-phosphate pyrophosphokinase	PROKKA_03839	2.4557	1.29613
Energy metabolism	Amino acids and amines	arginine deiminase	Arginine deiminase	PROKKA_05609	2.51162	1.32862
Protein fate	Protein and peptide secretion and trafficking	type VI secretion system peptidoglycan-associated domain	putative lipoprotein YiaD precursor	PROKKA_02089	2.5384	1.34392
Energy metabolism	Sugars	-	Periplasmic beta-glucosidase precursor	PROKKA_00052	2.55814	1.35509
Energy metabolism	Pentose phosphate pathway	glucose-6-phosphate dehydrogenase	Glucose-6-phosphate 1-dehydrogenase	PROKKA_04273	2.58548	1.37043
Transport and binding proteins	Carbohydrates, organic alcohols, and acids	exopolysaccharide transport protein family	LPS O-antigen length regulator	PROKKA_05019	2.62328	1.39137
Energy metabolism	Amino acids and amines	aspartate ammonia-lyase	Aspartate ammonia-lyase	PROKKA_00695	2.69332	1.42939
Protein fate	Protein and peptide secretion and trafficking	type I secretion C-terminal target domain (VC_A0849 subclass)	Leukotoxin	PROKKA_02401	2.74978	1.45931
DNA metabolism	Restriction/modification	type I restriction-modification system, M subunit	Type I restriction enzyme EcoKI M protein	PROKKA_03707	3.12543	1.64405
No classification	No classification	mycofactocin system FadH/OYE family oxidoreductase 2	N-ethylmaleimide reductase	PROKKA_00069	3.12759	1.64505
Amino acid biosynthesis	Aspartate family	diaminopimelate decarboxylase	Diaminopimelate decarboxylase	PROKKA_03377	3.25024	1.70055
Cell envelope	Biosynthesis and degradation of surface polysaccharides and lipopolysaccharides	bifunctional protein RfaE, domain I	Bifunctional protein HldE	PROKKA_03138	3.30681	1.72544
Cellular processes	Adaptations to atypical conditions	-	Catalase HPII	PROKKA_00543	3.31066	1.72712
Protein synthesis	Ribosomal proteins: synthesis and modification	ribosomal protein uS4	30S ribosomal protein S4	PROKKA_00045	3.52874	1.81915
Energy metabolism	Other	glycerol kinase	Glycerol kinase	PROKKA_04047	3.79065	1.92245
Purines, pyrimidines, nucleosides, and nucleotides	Nucleotide and nucleoside interconversions	guanylate kinase	Guanylate kinase	PROKKA_03329	3.81797	1.93281
Transport and binding proteins	Cations and iron carrying compounds	bacterioferritin	Bacterioferritin	PROKKA_03225	3.82337	1.93484
Energy metabolism	Glycolysis/gluconeogenesis	glyceraldehyde-3-phosphate dehydrogenase, type I	Glyceraldehyde-3-phosphate dehydrogenase	PROKKA_02238	3.97001	1.98914
Biosynthesis of cofactors, prosthetic groups, and carriers	Heme, porphyrin, and cobalamin	-	Delta-aminolevulinic acid dehydratase	PROKKA_03405	4.34192	2.11833
Cellular processes	Cell division	cell division protein FtsZ	Cell division protein FtsZ	PROKKA_01124	4.74259	2.24567
Energy metabolism	Amino acids and amines	glycine cleavage system H protein	Glycine cleavage system H protein	PROKKA_05603	4.84384	2.27615
Regulatory functions	DNA interactions	PEP-CTERM-box response regulator transcription factor	Alginate biosynthesis transcriptional regulatory protein AlgB	PROKKA_00527	5.14637	2.36355
DNA metabolism	DNA replication, recombination, and repair	DEXH box helicase, DNA ligase-associated	ATP-dependent RNA helicase DeaD	PROKKA_03903	5.17388	2.37125
Biosynthesis of cofactors, prosthetic groups, and carriers	Pantothenate and coenzyme A	phosphopantothenoylcysteine decarboxylase / phosphopantothenate--cysteine ligase	Coenzyme A biosynthesis bifunctional protein CoaBC	PROKKA_03339	on T	4
Biosynthesis of cofactors, prosthetic groups, and carriers	Chlorophyll and bacteriochlorphyll	geranylgeranyl reductase family	p-hydroxybenzoate hydroxylase	PROKKA_03089	on T	4
Biosynthesis of cofactors, prosthetic groups, and carriers	Pyridoxine	pyridoxal 5'-phosphate synthase, synthase subunit Pdx1	Thiazole synthase	PROKKA_00435	on T	4
Cell envelope	Other	putative membrane-bound dehydrogenase domain	Membrane bound L-sorbosone dehydrogenase	PROKKA_01908	on T	4
Cell envelope	Biosynthesis and degradation of murein sacculus and peptidoglycan	-	Membrane-bound lytic murein transglycosylase A precursor	PROKKA_02411	on T	4
Cellular processes	Cell division	cell division protein FtsA	Cell division protein FtsA	PROKKA_01123	on T	4
Cellular processes	Other	adhesin HecA family 20-residue repeat (two copies)	Filamentous hemagglutinin	PROKKA_04562	on T	4
Cellular processes	Chemotaxis and motility	-	Methyl-accepting chemotaxis protein McpS	PROKKA_05339	on T	4
DNA metabolism	Restriction/modification	type I restriction-modification system, M subunit	putative type I restriction enzymeP M protein	PROKKA_04579	on T	4
Energy metabolism	Electron transport	cytochrome c-type biogenesis protein CcmI	Formate-dependent nitrite reductase complex subunit NrfG	PROKKA_00359	on T	4
Energy metabolism	Other	heme/flavin dehydrogenase, mycofactocin system	L-lactate dehydrogenase [cytochrome]	PROKKA_01246	on T	4
Energy metabolism	Electron transport	pyridine nucleotide-disulfide oxidoreductase family protein	NADH dehydrogenase	PROKKA_00959	on T	4
Energy metabolism	Electron transport	NADH oxidoreductase (quinone), F subunit	NADH-quinone oxidoreductase subunit F	PROKKA_02634	on T	4
Fatty acid and phospholipid metabolism	Biosynthesis	3-oxoacyl-[acyl-carrier-protein] reductase	3-oxoacyl-[acyl-carrier-protein] reductase FabG	PROKKA_01847	on T	4
Fatty acid and phospholipid metabolism	Biosynthesis	malonyl CoA-acyl carrier protein transacylase	Malonyl CoA-acyl carrier protein transacylase	PROKKA_05080	on T	4
No classification	No classification	putative PEP-CTERM system TPR-repeat lipoprotein	bacteriophage N4 receptor, outer membrane subunit	PROKKA_03843	on T	4
No classification	No classification	squalene-associated FAD-dependent desaturase	Dehydrosqualene desaturase	PROKKA_03861	on T	4
No classification	No classification	voltage-dependent potassium channel beta subunit	General stress protein 69	PROKKA_05325	on T	4
No classification	No classification	-	putative assembly protein	PROKKA_03224	on T	4
No classification	No classification	-	Putative glucose-6-phosphate 1-epimerase	PROKKA_00705	on T	4
No classification	No classification	-	Transglutaminase-like superfamily protein	PROKKA_01433	on T	4
Protein fate	Degradation of proteins, peptides, and glycopeptides	hydrolase, peptidase M42 family	Glutamyl aminopeptidase	PROKKA_01230	on T	4
Protein fate	Degradation of proteins, peptides, and glycopeptides	-	peptidase PmbA	PROKKA_01048	on T	4
Protein fate	Degradation of proteins, peptides, and glycopeptides	signal peptide peptidase SppA, 67K type	putative protease SohB	PROKKA_04376	on T	4
Protein synthesis	tRNA and rRNA base modification	tRNA-guanine transglycosylase	Queuine tRNA-ribosyltransferase	PROKKA_01492	on T	4
Transcription	Transcription factors	RNA polymerase sigma factor, sigma-70 family	Transcriptional regulator LsrR	PROKKA_04367	on T	4
Transport and binding proteins	Cations and iron carrying compounds	2,3-dihydro-2,3-dihydroxybenzoate dehydrogenase	Fatty acyl-CoA reductase	PROKKA_01304	on T	4
Amino acid biosynthesis	Aromatic amino acid family	3-dehydroquinate synthase	3-dehydroquinate synthase	PROKKA_03075	on UT	-4
Amino acid biosynthesis	Pyruvate family	acetolactate synthase, small subunit	Acetolactate synthase isozyme 3 small subunit	PROKKA_03771	on UT	-4
Amino acid biosynthesis	Histidine family	histidinol-phosphate transaminase	Histidinol-phosphate aminotransferase 2	PROKKA_01520	on UT	-4
Amino acid biosynthesis	Aspartate family	homocitrate synthase	Hydroxymethylglutaryl-CoA lyase YngG	PROKKA_02584	on UT	-4
Amino acid biosynthesis	Histidine family	-	Imidazoleglycerol-phosphate dehydratase	PROKKA_02986	on UT	-4
Amino acid biosynthesis	Pyruvate family	alanine dehydrogenase	L-lysine cyclodeaminase	PROKKA_02503	on UT	-4
Amino acid biosynthesis	Serine family	sulfite reductase [NADPH] flavoprotein, alpha-component	Sulfite reductase [NADPH] flavoprotein alpha-component	PROKKA_01540	on UT	-4
Biosynthesis of cofactors, prosthetic groups, and carriers	Other	1-deoxy-D-xylulose-5-phosphate synthase	2-oxoisovalerate dehydrogenase subunit beta	PROKKA_02509	on UT	-4
Biosynthesis of cofactors, prosthetic groups, and carriers	Biotin	dethiobiotin synthase	ATP-dependent dethiobiotin synthetase BioD 1	PROKKA_05499	on UT	-4
Biosynthesis of cofactors, prosthetic groups, and carriers	Glutathione and analogs	gamma-glutamyltransferase	Gamma-glutamyltranspeptidase precursor	PROKKA_05004	on UT	-4
Biosynthesis of cofactors, prosthetic groups, and carriers	Heme, porphyrin, and cobalamin	cobalamin biosynthesis protein CobW	Putative metal chaperone YciC	PROKKA_04172	on UT	-4
Biosynthesis of cofactors, prosthetic groups, and carriers	Other	folate-binding protein YgfZ	tRNA-modifying protein YgfZ	PROKKA_02355	on UT	-4
Cell envelope	Biosynthesis and degradation of surface polysaccharides and lipopolysaccharides	acyl-[acyl-carrier-protein]-UDP-N-acetylglucosamine O-acyltransferase	Acyl-[acyl-carrier-protein]--UDP-N-acetylglucosamine O-acyltransferase	PROKKA_04757	on UT	-4
Cell envelope	Other	lipoprotein, YaeC family	D-methionine-binding lipoprotein MetQ precursor	PROKKA_02911	on UT	-4
Cell envelope	Biosynthesis and degradation of surface polysaccharides and lipopolysaccharides	LPS export ABC transporter periplasmic protein LptC	lipopolysaccharide exporter periplasmic protein	PROKKA_01061	on UT	-4
Cell envelope	Biosynthesis and degradation of surface polysaccharides and lipopolysaccharides	nucleotide sugar dehydrogenase	UDP-N-acetyl-D-glucosamine 6-dehydrogenase	PROKKA_00908	on UT	-4
Cellular processes	Other	-	Acyl-homoserine lactone acylase PvdQ precursor	PROKKA_00251	on UT	-4
Cellular processes	Pathogenesis	filamentous hemagglutinin family N-terminal domain	Hemolysin precursor	PROKKA_05595	on UT	-4
Cellular processes	Adaptations to atypical conditions	-	Superoxide dismutase [Mn/Fe]	PROKKA_01052	on UT	-4
Central intermediary metabolism	Other	succinate-semialdehyde dehydrogenase	Succinate-semialdehyde dehydrogenase [NADP(+)]	PROKKA_03207	on UT	-4
DNA metabolism	DNA replication, recombination, and repair	cold shock domain protein CspD	Cold shock protein CapB	PROKKA_04737	on UT	-4
DNA metabolism	DNA replication, recombination, and repair	integration host factor, alpha subunit	DNA-binding protein HU-beta	PROKKA_00722	on UT	-4
DNA metabolism	DNA replication, recombination, and repair	exodeoxyribonuclease III	Exodeoxyribonuclease III	PROKKA_02589	on UT	-4
Energy metabolism	Pyruvate dehydrogenase	pyruvate dehydrogenase (acetyl-transferring) E1 component, alpha subunit	2-oxoisovalerate dehydrogenase subunit alpha	PROKKA_02510	on UT	-4
Energy metabolism	Amino acids and amines	3-hydroxyisobutyrate dehydrogenase	3-hydroxyisobutyrate dehydrogenase	PROKKA_01175	on UT	-4
Energy metabolism	TCA cycle	fumarate hydratase, class II	Fumarate hydratase class II	PROKKA_01050	on UT	-4
Energy metabolism	Amino acids and amines	maleylacetoacetate isomerase	Glutathione S-transferase GstB	PROKKA_00268	on UT	-4
Energy metabolism	Other	phenylacetate degradation probable enoyl-CoA hydratase PaaB	Hydroxycinnamoyl-CoA hydratase-lyase	PROKKA_02580	on UT	-4
Energy metabolism	Amino acids and amines	imidazolonepropionase	Imidazolonepropionase	PROKKA_03027	on UT	-4
Energy metabolism	TCA cycle	dihydrolipoyllysine-residue succinyltransferase, E2 component of oxoglutarate dehydrogenase (succinyl-transferring) complex	Lipoamide acyltransferase component of branched-chain alpha-keto acid dehydrogenase complex	PROKKA_02508	on UT	-4
Energy metabolism	TCA cycle	malate dehydrogenase (acceptor)	Malate:quinone oxidoreductase	PROKKA_01079	on UT	-4
Energy metabolism	Other	methylisocitrate lyase	Methylisocitrate lyase	PROKKA_02048	on UT	-4
Energy metabolism	ATP-proton motive force interconversion	methylmalonyl-CoA decarboxylase alpha subunit	Methylmalonyl-CoA carboxyltransferase 12S subunit	PROKKA_02581	on UT	-4
Energy metabolism	Electron transport	-	NADPH azoreductase	PROKKA_04188	on UT	-4
Energy metabolism	Other	methylisocitrate lyase	Oxaloacetate decarboxylase	PROKKA_05277	on UT	-4
Energy metabolism	Glycolysis/gluconeogenesis	-	Phosphoenolpyruvate carboxylase	PROKKA_04798	on UT	-4
Energy metabolism	Amino acids and amines	succinylglutamate desuccinylase	Succinylglutamate desuccinylase	PROKKA_01886	on UT	-4
Energy metabolism	Amino acids and amines	fumarylacetoacetase	Ureidoglycolate lyase	PROKKA_01666	on UT	-4
Fatty acid and phospholipid metabolism	Other	2-methylcitrate synthase/citrate synthase II	2-methylcitrate synthase	PROKKA_02046	on UT	-4
Fatty acid and phospholipid metabolism	Biosynthesis	acetyl-CoA carboxylase, biotin carboxylase subunit	2-oxoglutarate carboxylase small subunit	PROKKA_00677	on UT	-4
Fatty acid and phospholipid metabolism	Biosynthesis	beta-hydroxyacyl-(acyl-carrier-protein) dehydratase FabZ	3-hydroxyacyl-[acyl-carrier-protein] dehydratase FabZ	PROKKA_04758	on UT	-4
Fatty acid and phospholipid metabolism	Other	acetyl-CoA C-acyltransferase	Acetyl-CoA acetyltransferase	PROKKA_01444	on UT	-4
Fatty acid and phospholipid metabolism	Other	acetyl-CoA C-acyltransferase	Acetyl-CoA acetyltransferase	PROKKA_05218	on UT	-4
Fatty acid and phospholipid metabolism	Other	2-methylisocitrate dehydratase, Fe/S-dependent	Aconitate hydratase 1	PROKKA_02045	on UT	-4
Fatty acid and phospholipid metabolism	Other	cyclohexanecarboxyl-CoA dehydrogenase	Acyl-CoA dehydrogenase	PROKKA_05221	on UT	-4
Fatty acid and phospholipid metabolism	Other	cyclohexanecarboxyl-CoA dehydrogenase	Acyl-CoA dehydrogenase	PROKKA_02582	on UT	-4
Fatty acid and phospholipid metabolism	Other	cyclohexanecarboxyl-CoA dehydrogenase	Acyl-CoA dehydrogenase	PROKKA_05219	on UT	-4
Fatty acid and phospholipid metabolism	Other	dicarboxylate--CoA ligase PimA	Long-chain-fatty-acid--CoA ligase	PROKKA_05661	on UT	-4
Fatty acid and phospholipid metabolism	Other	3-oxoacid CoA-transferase, A subunit	putative succinyl-CoA:3-ketoacid coenzyme A transferase subunit A	PROKKA_01442	on UT	-4
No classification	No classification	-	Carboxymethylenebutenolidase	PROKKA_00175	on UT	-4
No classification	No classification	alkylhydroperoxidase AhpD family core domain	Carboxymuconolactone decarboxylase family protein	PROKKA_01563	on UT	-4
No classification	No classification	-	Cupin domain protein	PROKKA_00144	on UT	-4
No classification	No classification	-	Decarbamoylnovobiocin carbamoyltransferase	PROKKA_03131	on UT	-4
No classification	Unknown function	-	hypothetical protein	PROKKA_05205	on UT	-4
No classification	Unknown function	-	hypothetical protein	PROKKA_02708	on UT	-4
No classification	Unknown function	-	hypothetical protein	PROKKA_03689	on UT	-4
No classification	Unknown function	-	hypothetical protein	PROKKA_04718	on UT	-4
No classification	Unknown function	-	hypothetical protein	PROKKA_05173	on UT	-4
No classification	No classification	-	Indole-3-glycerol phosphate synthase	PROKKA_00895	on UT	-4
No classification	No classification	-	Membrane dipeptidase (Peptidase family M19)	PROKKA_05375	on UT	-4
No classification	No classification	-	NAD dependent epimerase/dehydratase family protein	PROKKA_03324	on UT	-4
No classification	No classification	-	NmrA-like family protein	PROKKA_02300	on UT	-4
No classification	No classification	-	Porin D precursor	PROKKA_01002	on UT	-4
No classification	No classification	-	putative chaperone protein EcpD	PROKKA_02569	on UT	-4
No classification	No classification	-	putative lipoprotein YgdR precursor	PROKKA_00373	on UT	-4
No classification	No classification	-	Putative pterin-4-alpha-carbinolamine dehydratase	PROKKA_01786	on UT	-4
No classification	No classification	putative NAD(P)H quinone oxidoreductase, PIG3 family	Quinone oxidoreductase 1	PROKKA_03426	on UT	-4
No classification	No classification	-	SCP-2 sterol transfer family protein	PROKKA_04378	on UT	-4
No classification	No classification	-	Serralysin precursor	PROKKA_00834	on UT	-4
Protein fate	Degradation of proteins, peptides, and glycopeptides	ATP-dependent Clp endopeptidase, proteolytic subunit ClpP	ATP-dependent Clp protease proteolytic subunit	PROKKA_02543	on UT	-4
Protein fate	Degradation of proteins, peptides, and glycopeptides	peptidase, ArgE/DapE family	Carboxypeptidase G2 precursor	PROKKA_05384	on UT	-4
Protein fate	Protein and peptide secretion and trafficking	outer membrane autotransporter barrel domain	Extracellular serine protease precursor	PROKKA_01697	on UT	-4
Protein fate	Protein and peptide secretion and trafficking	type VI secretion system effector, Hcp1 family	hypothetical protein	PROKKA_03301	on UT	-4
Protein fate	Protein modification and repair	methionine aminopeptidase, type I	Methionine aminopeptidase	PROKKA_04770	on UT	-4
Protein fate	Protein modification and repair	peptide-methionine (S)-S-oxide reductase	Peptide methionine sulfoxide reductase MsrA	PROKKA_03117	on UT	-4
Protein synthesis	Ribosomal proteins: synthesis and modification	ribosomal protein bS16	30S ribosomal protein S16	PROKKA_04982	on UT	-4
Protein synthesis	Ribosomal proteins: synthesis and modification	ribosomal protein uS19	30S ribosomal protein S19	PROKKA_00026	on UT	-4
Protein synthesis	Ribosomal proteins: synthesis and modification	ribosomal-protein-alanine acetyltransferase	Acetyltransferase (GNAT) family protein	PROKKA_03573	on UT	-4
Protein synthesis	Other	ribosome-associated GTPase EngA	GTPase Der	PROKKA_01468	on UT	-4
Protein synthesis	tRNA aminoacylation	serine--tRNA ligase	Serine--tRNA ligase	PROKKA_02661	on UT	-4
Regulatory functions	DNA interactions	D-fructose-responsive transcription factor	Catabolite repressor/activator	PROKKA_00978	on UT	-4
Regulatory functions	Transcription factors	phosphonate utilization associated transcriptional regulator	HTH-type transcriptional regulator LutR	PROKKA_01026	on UT	-4
Transport and binding proteins	Anions	molybdate ABC transporter, periplasmic molybdate-binding protein	Bacterial extracellular solute-binding protein	PROKKA_02316	on UT	-4
Transport and binding proteins	Amino acids, peptides and amines	lysine-arginine-ornithine-binding periplasmic protein	Cystine-binding periplasmic protein precursor	PROKKA_00683	on UT	-4
Transport and binding proteins	Carbohydrates, organic alcohols, and acids	D-xylose ABC transporter, D-xylose-binding protein	D-galactose-binding periplasmic protein precursor	PROKKA_04296	on UT	-4
Transport and binding proteins	Cations and iron carrying compounds	TonB-dependent siderophore receptor	Ferripyoverdine receptor precursor	PROKKA_05370	on UT	-4
Transport and binding proteins	Amino acids, peptides and amines	choline ABC transporter, periplasmic binding protein	Glycine betaine-binding protein OpuAC precursor	PROKKA_02443	on UT	-4
Transport and binding proteins	Cations and iron carrying compounds	TonB-dependent hemoglobin/transferrin/lactoferrin receptor family protein	Hemin receptor precursor	PROKKA_04650	on UT	-4
Transport and binding proteins	Cations and iron carrying compounds	proposed F420-0 ABC transporter, periplasmic F420-0 binding protein	Hemin-binding periplasmic protein HmuT precursor	PROKKA_01319	on UT	-4
Transport and binding proteins	Cations and iron carrying compounds	heme ABC transporter, heme-binding protein isdE	Hemin-binding periplasmic protein HmuT precursor	PROKKA_03761	on UT	-4
Transport and binding proteins	Unknown substrate	anchored repeat ABC transporter, substrate-binding protein	High-affinity zinc uptake system protein ZnuA precursor	PROKKA_00538	on UT	-4
Transport and binding proteins	Anions	phosphate ABC transporter, ATP-binding protein	hypothetical protein	PROKKA_05330	on UT	-4
Transport and binding proteins	Other	2-aminoethylphosphonate ABC transporter, 2-aminoethylphosphonate binding protein	hypothetical protein	PROKKA_04599	on UT	-4
Transport and binding proteins	Amino acids, peptides and amines	urea ABC transporter, urea binding protein	Leucine-, isoleucine-, valine-, threonine-, and alanine-binding protein precursor	PROKKA_03209	on UT	-4
Transport and binding proteins	Amino acids, peptides and amines	lysine-arginine-ornithine-binding periplasmic protein	Lysine-arginine-ornithine-binding periplasmic protein precursor	PROKKA_01352	on UT	-4
Transport and binding proteins	Amino acids, peptides and amines	lysine-arginine-ornithine-binding periplasmic protein	Lysine-arginine-ornithine-binding periplasmic protein precursor	PROKKA_04728	on UT	-4
Transport and binding proteins	Cations and iron carrying compounds	nickel ABC transporter, nickel/metallophore periplasmic binding protein	Periplasmic dipeptide transport protein precursor	PROKKA_01003	on UT	-4
Transport and binding proteins	Cations and iron carrying compounds	nickel ABC transporter, nickel/metallophore periplasmic binding protein	Periplasmic dipeptide transport protein precursor	PROKKA_01001	on UT	-4
Transport and binding proteins	Unknown substrate	anchored repeat ABC transporter, substrate-binding protein	putative periplasmic iron-binding protein precursor	PROKKA_00656	on UT	-4
Transport and binding proteins	Cations and iron carrying compounds	TonB-dependent siderophore receptor	putative TonB-dependent receptor BfrD precursor	PROKKA_04286	on UT	-4
Transport and binding proteins	Cations and iron carrying compounds	TonB-dependent hemoglobin/transferrin/lactoferrin receptor family protein	putative TonB-dependent receptor precursor	PROKKA_01603	on UT	-4
Transport and binding proteins	Amino acids, peptides and amines	putative 2-aminoethylphosphonate ABC transporter, permease protein	sn-glycerol-3-phosphate transport system permease protein UgpA	PROKKA_05646	on UT	-4
Transport and binding proteins	Anions	sulfate ABC transporter, sulfate-binding protein	Sulfate-binding protein precursor	PROKKA_00355	on UT	-4

## Sheet: info
this data sheet contains additional information on the data given in table "all"
column	A-F	information on protein function
		classification of proteins according to TIGRFAMS (with manual editing)
		protein description as stated in the header of the provided protein sequence database
		molecular weight calculated based on the amino acid sequence of the protein
	G-O	quantitative data based on normalized spectrum abundance factor (NSAF)
		NSAF for each analyzed biological replicate and condition
		average of NSAF for each condition
		ratio of averaged NSAF treated(T)/untreated(UT)
		cells highlighted in red: significantly changed amount and fold-change >2
		cells hightlighted in green: significantly changed amount and fold-change <0.5
	P-S	additional information
		result of significance analysis
			MeV software; t-test was applied; p=0.01
			"1" significantly changed amount
			"0" not significantly changed
		repcount = number of replicates with positive protein identification per condition
			off - the protein was not identified in all replicates of a given condition
		MEV indicates if the protein was considered for statistical analysis using MeV (true) or not (false)
			for statistical analysis a protein had to be identified in 2 out of 3 biological replicates per condition
